# Supplementary material for: An interactive nomogram based on clinical and molecular signatures to predict prognosis in multiple myeloma patients
Source: publisher site journal article supplement (doi:10.18632/aging.203294), 2021-07-14
Supplement: Supplementary file [file aging-v13i14-203294-supplementary-material-SD4.pdf]

**SUPPLEMENTARY TABLE**

**Supplementary Table 3. Summary of clinical characteristics of GSE24080.**

| Items           |                                                            | Input data   |                                            |
|-----------------|------------------------------------------------------------|--------------|--------------------------------------------|
| AGE             | 1 year - 80 years                                          | <b>64.16</b> | <b>years</b>                               |
| CREAT           | Creatinine                                                 | <b>0.6</b>   | <b>mg/dl</b>                               |
| LDH             | Lactate dehydrogenase                                      | <b>185</b>   | <b>U/l</b>                                 |
| ALB             | Albumin                                                    | <b>4.2</b>   | <b>g/dl</b>                                |
| Cyto_Abn        | An indicator of the detection of cytogenetic abnormalities | <b>1</b>     | <b>1=abnormal; 0=no detected or absent</b> |
| Riskscore       | Risk score based on genes                                  | <b>1.01</b>  | <b>1=high risk; 0=low risk</b>             |
| <b>Results:</b> | 1-year Survival Prob                                       |              | <b>0.858645467</b>                         |
|                 | 3-years Survival Prob                                      |              | <b>0.61493303</b>                          |
|                 | 5-years Survival Prob                                      |              | <b>0.408277594</b>                         |
|                 | 7-years Survival Prob                                      |              | <b>0.271462399</b>                         |

Nomogram predicts overall survival of MM patients.
