# Supplementary material for: An interactive nomogram based on clinical and molecular signatures to predict prognosis in multiple myeloma patients
Source: Aging (Albany NY). 2021 Jul 14;13(14):18442–63. doi: 10.18632/aging.203294 (PMC8351694; doi:10.18632/aging.203294)
Supplement: Supplementary Table 1 [file aging-13-203294-s002.xlsx]

## Sheet: Sheet1
Supplementary Table 1. Univariate and multivariate Cox regression analysis for clinical characteristics and risk score.
original order	PATID	CELfilename	ArrayScanDate	PROT	CHIP	AGE	SEX	RACE	ISOTYPE	B2M	CRP	CREAT	LDH	ALB	HGB	ASPC	BMPC	MRI	CPS1	CPR1	EFS CENSOR (1=event) JUN2008	EFS TIME JUN2008	OS CENSOR (1=death) JUN2008	OS TIME JUN2008	MAQC_Distribution_Status	Cyto Abn	EFS_MO JUN2008	OS_MO JUN2008	birthdate	entrydate	enrolledon	relapsedate	lastcontactdate	deathdate	EFS-censor	OS-censor	Date of progression, relapse,death or last contact	Date of death or last contact	EFS(months)	OS (months)
1	8241	P0002-01-FAKE03-U133Plus-2.CEL	03/18/2004 14:25:00.000	TT2	U133Plus-P002	53.3562	female	white	IgG	1.8	8.6	0.6	149	4.9	9.9	58	80	0	0	1	0	94.3333	0	94.3333	Training	0	0	0	1946-12-14	2000-02-11	2000-02-29		2007-11-29		0	0	2007-11-29	2007-11-29	93	93
2	9843	P0008-01-FAKE04-U133Plus-2.CEL	03/08/2004 12:31:00.000	TT2	U133Plus-P008	52.7056	female	white	IgG	1.7	8.9	0.6	144	3.9	11.3	30	20	1	0	1	0	96.8667	0	96.8667	Training	1	0	0	1947-10-25	2000-05-16	2000-05-17		2008-05-01		0	0	2008-05-01	2008-05-01	96	96
3	9888	P0009-01-FAKE05-U133Plus-2.CEL	03/02/2004 19:48:00.000	TT2	U133Plus-P009	62.0288	male	white	Nonsecretory	5.5	4.5	0.8	113	4.7	11	56	90	4	1	1	0	88.5	0	88.5	Training	1	0	0	1938-07-15	2000-05-01	2000-05-24		2007-08-31		0	0	2007-08-31	2007-08-31	87	87
4	9835	P0010-01-FAKE06-U133Plus-2.CEL	03/18/2004 12:58:00.000	TT2	U133Plus-P010	60.313	male	white	IgA	2.8	9.9	1	102	4.6	13.3	33	20	0	1	1	1	76.0667	0	98.5	Training	0	0	0	1940-03-29	2000-04-26	2000-05-22	2006-08-21	2008-06-24		1	0	2006-08-21	2008-06-24	75	98
5	9997	P0015-01-A016-U133Plus-2.CEL	03/08/2004 19:45:00.000	TT2	U133Plus-P015	66.9211	male	white	IgG	4	2.6	1.2	194	4.2	9.5	45	70	26	1	1	1	42.6667	1	42.6667	Training	0	0	0	1933-10-09	2000-06-23	2000-07-05		2004-01-06	2004-01-06	0	1	2004-01-06	2004-01-06	42	43
6	9992	P0016-01-A21-U133Plus-2.CEL	03/18/2004 11:10:00.000	TT2	U133Plus-P016	55.2588	female	white	IgA	2.9	2.1	1	146	4.8	6.7		50	13	0	0	0	90.8	0	90.8	Training	0	0	0	1945-05-28	2000-06-27	2000-07-06		2007-12-21		0	0	2007-12-21	2007-12-21	89	90
7	10003	P0018-01-A30-U133Plus-2.CEL	03/08/2004 12:57:00.000	TT2	U133Plus-P018	57.0652	male	white	FLC	3.1	32.5	0.7	199	4.2	11.9	33.5	40	9	1	1	1	33.1333	0	96.2667	Training	0	0	0	1943-08-03	2000-06-29	2000-06-30	2003-03-21	2008-05-27		1	0	2003-03-21	2008-05-27	33	95
8	10021	P0019-01-A40-U133Plus-2.CEL	03/08/2004 13:09:00.000	TT2	U133Plus-P019	55.9341	male	other	IgG	1.7	8.6	0.8	194	4.2	12.9	20	10	17	1	1	1	21.2667	1	38.2667	Training	0	1	0	1944-10-13	2000-07-07	2000-07-25	2002-04-24	2003-09-16	2003-09-16	1	1	2002-04-24	2003-09-16	21	38
9	9983	P0025-01-A53-U133Plus-2.CEL	03/18/2004 11:53:00.000	TT2	U133Plus-P025	54.4873	male	white	IgG	2.5	0.2	1.1	166	5.2	11.1	18	60	0	1	1	0	91.9	0	91.9	Training	0	0	0	1946-03-13	2000-06-21	2000-07-14		2008-01-31		0	0	2008-01-31	2008-01-31	90	91
10	10107	P0029-01-A70-U133Plus-2.CEL	03/08/2004 13:34:00.000	TT2	U133Plus-P029	59.7062	male	white	IgA	3.3	1.8	1	52	3.4	12.2	40	70	0	1	1	1	92.6	0	96.1333	Training	0	0	0	1941-01-09	2000-07-26	2000-07-26	2008-03-04	2008-06-18		1	0	2008-03-04	2008-06-18	92	95
11	10098	P0030-01-A72-U133Plus-2.CEL	03/18/2004 11:38:00.000	TT2	U133Plus-P030	46.6191	male	white	IgG	4	2.2	0.8	131	3.8	9.1	75	70	15	1	1	1	34.8	1	88.2667	Training	0	0	0	1954-01-28	2000-07-26	2000-07-26	2003-06-05	2007-10-26	2007-10-26	1	1	2003-06-05	2007-10-26	35	87
13	10231	P0036-01-A120-U133Plus-2.CEL	02/26/2004 09:40:00.000	TT2	U133Plus-P036	45.8367	female	other	IgG	1.7	12.7	0.8	161	4.3	10.5	36	30	4	0	1	0	84.7	0	84.7	Training	0	0	0	1954-12-20	2000-08-30	2000-09-05		2007-08-21		0	0	2007-08-21	2007-08-21	83	84
14	10195	P0037-01-A111-U133Plus-2.CEL	03/18/2004 14:06:00.000	TT2	U133Plus-P037	55.4152	female	white	IgG	5.7	2.4	0.8	79	2.9	8.6	35	60	17	0	1	1	50.1333	0	95.2	Training	0	0	0	1945-05-21	2000-08-24	2000-08-25	2004-10-07	2008-06-20		1	0	2004-10-07	2008-06-20	50	94
15	10258	P0043-01-A153-U133Plus-2.CEL	03/09/2004 14:33:00.000	TT2	U133Plus-P043	51.9753	female	white	IgG	3.2	5.7	0.7	200	3.9	12.8	40	30	8	0	0	1	8.86667	1	8.86667	Training	0	1	1	1948-11-29	2000-08-23	2000-09-29		2001-06-22	2001-06-22	0	1	2001-06-22	2001-06-22	9	10
16	10338	P0048-01-A172-U133Plus-2.CEL	03/18/2004 12:05:00.000	TT2	U133Plus-P048	68.9197	female	white	IgG	3.3	10.1	0.7	162	4.2	11.8	55	30	2	0	1	1	23	1	36.1	Training	1	1	0	1932-01-13	2000-10-03	2000-10-06	2002-08-27	2003-09-24	2003-09-24	1	1	2002-08-27	2003-09-24	22	35
17	10373	P0051-01-A185-U133Plus-2.CEL	03/08/2004 13:47:00.000	TT2	U133Plus-P051	53.6253	male	white	IgG	18.8	94.1	2.5	192	2.1	8.5	55	70	42	1	1	1	20.1333	1	20.1333	Training	1	1	1	1947-04-26	2000-10-11	2000-10-17		2002-06-13	2002-06-13	0	1	2002-06-13	2002-06-13	20	20
18	10357	P0052-01-A180-U133Plus-2.CEL	03/09/2004 16:40:00.000	TT2	U133Plus-P052	40.173	male	white	FLC	5.8	8.1	3.1	172	4.5	7.8	70	70	14	1	0	1	77.9667	0	93.7333	Training	0	0	0	1960-09-19	2000-10-09	2000-10-12	2007-03-09	2008-06-24		1	0	2007-03-09	2008-06-24	77	92
19	10402	P0053-01-A209-U133Plus-2.CEL	03/08/2004 11:54:00.000	TT2	U133Plus-P053	58.221	female	white	IgG	1.4	1.8	0.6	123	4.1	12.3	25	40	29	0	1	1	29.2	1	29.2	Training	0	0	0	1942-10-01	2000-10-15	2000-10-23		2003-03-18	2003-03-18	0	1	2003-03-18	2003-03-18	29	29
20	10382	P0054-01-A194-U133Plus-2.CEL	03/02/2004 17:18:00.000	TT2	U133Plus-P054	60.0055	male	white	IgG	5.7	2.9	1.2	67	3.7	12.2	48	40	5	1	0	1	52.4667	1	57.8667	Training	1	0	0	1940-12-22	2000-10-13	2000-10-25	2005-02-15	2005-07-27	2005-07-27	1	1	2005-02-15	2005-07-27	52	57
21	10405	P0055-01-A204-U133Plus-2.CEL	03/30/2004 16:43:00.000	TT2	U133Plus-P055	56.9307	male	white	FLC	2	0.8	0.9	170	4.2	12.6	26	10	5	1	1	1	39.0667	1	45.6333	Training	1	0	0	1944-01-10	2000-10-16	2000-10-19	2004-01-04	2004-07-19	2004-07-19	1	1	2004-01-04	2004-07-19	39	45
22	10410	P0056-01-A211-U133Plus-2.CEL	03/17/2004 14:05:00.000	TT2	U133Plus-P056	43.1929	female	white	FLC	8.9	0.8	1.5	122	5.1	10	79	70	4	0	1	0	92.7	0	92.7	Training	1	0	0	1957-09-27	2000-10-18	2000-10-24		2008-06-05		0	0	2008-06-05	2008-06-05	92	92
23	10425	P0057-01-A217-U133Plus-2.CEL	03/08/2004 19:58:00.000	TT2	U133Plus-P057	68.2334	male	white	IgG	2.4	1	1.2	180	4.4	11.4	50	60	16	1	1	1	17.6333	1	27.3	Training	1	1	0	1932-10-16	2000-10-26	2000-11-02	2002-04-15	2003-01-30	2003-01-30	1	1	2002-04-15	2003-01-30	17	27
24	10463	P0061-01-A246-U133Plus-2.CEL	03/13/2004 14:44:00.000	TT2	U133Plus-P061	63.0199	male	white	IgG	2.4	59.6	1.2	181	5.1	12.4	25	30	2	1	1	0	90.9667	0	90.9667	Training	1	0	0	1938-01-04	2000-11-06	2000-11-09		2008-04-30		0	0	2008-04-30	2008-04-30	89	89
25	10473	P0063-01-A248-U133Plus-2.CEL	03/18/2004 10:55:00.000	TT2	U133Plus-P063	53.4029	male	white	IgG	2.8	8.7	0.9	169	4.8	11.8	87	70	27	1	1	1	43.2333	1	52.0333	Training	1	0	0	1947-08-13	2000-11-09	2000-11-14	2004-06-03	2005-02-22	2005-02-22	1	1	2004-06-03	2005-02-22	43	51
26	10504	P0065-01-A261-U133Plus-2.CEL	03/08/2004 20:35:00.000	TT2	U133Plus-P065	50.048	male	white	IgA	14.6	1.9	2	184	4.5	9.3	61	90	12	1	1	1	18.2333	1	71.4	Training	1	1	0	1951-01-02	2000-11-20	2000-11-30	2002-05-31	2006-10-12	2006-10-12	1	1	2002-05-31	2006-10-12	18	71
27	10759	P0066-01-A264-U133Plus-2.CEL	02/25/2004 12:10:00.000	TT2	U133Plus-P066	64.4942	male	white	IgG	6.7	6.8	0.9	190	3	12.9	96	90	4	1	0	1	39.2667	1	39.2667	Training	1	0	0	1936-08-04	2000-11-27	2000-11-28		2004-02-19	2004-02-19	0	1	2004-02-19	2004-02-19	39	39
28	10764	P0067-01-A274-U133Plus-2.CEL	03/08/2004 12:07:00.000	TT2	U133Plus-P067	38.6932	female	white	IgG	1.7	1	0.7	275	4	9.9	78	90	1	0	0	1	1.6	1	1.6	Training	1	1	1	1962-04-30	2000-11-28	2000-11-30		2001-01-17	2001-01-17	0	1	2001-01-17	2001-01-17	2	2
29	11567	P0069-01-A296-U133Plus-2.CEL	03/18/2004 12:18:00.000	TT2	U133Plus-P069	42.9101	male	white	IgG	2.2	63	1	124	3.3	10.8	35	30	15	1	0	0	90.9333	0	90.9333	Training	0	0	0	1958-03-07	2000-12-14	2000-12-21		2008-06-10		0	0	2008-06-10	2008-06-10	90	90
30	11645	P0075-01-A332-U133Plus-2.CEL	03/18/2004 12:30:00.000	TT2	U133Plus-P075	58.5971	female	white	IgG	12.4	1.5	1.4	97	2.9	8.2	48	50	1	0	1	1	18.4333	1	29.8333	Training	1	1	0	1942-08-11	2001-01-11	2001-01-17	2002-07-24	2003-07-01	2003-07-01	1	1	2002-07-24	2003-07-01	18	30
31	11736	P0077-01-A357-U133Plus-2.CEL	03/13/2004 14:32:00.000	TT2	U133Plus-P077	70.0453	male	white	IgG	2	1.3	1	112	4.5	14	39	50	16	1	1	0	84.6333	0	84.6333	Training	0	0	0	1931-03-20	2001-01-22	2001-01-25		2008-01-08		0	0	2008-01-08	2008-01-08	84	84
32	11696	P0079-01-A351-U133Plus-2.CEL	03/13/2004 14:57:00.000	TT2	U133Plus-P079	54.7316	male	white	IgG	2.5	4.3	1.1	168	4.6	11.3	51	70	0	1	0	1	44.9333	1	44.9333	Training	0	0	0	1946-07-04	2001-01-18	2001-02-01		2004-10-11	2004-10-11	0	1	2004-10-11	2004-10-11	44	45
33	11803	P0083-01-A389-U133Plus-2.CEL	03/17/2004 14:42:00.000	TT2	U133Plus-P083	56.2718	male	white	IgG	4.4	1.1	1.3	144	3.4	10.2	30	30	0	1	1	0	86.5	0	86.5	Training	0	0	0	1944-12-28	2001-01-30	2001-02-09		2008-03-19		0	0	2008-03-19	2008-03-19	85	86
35	11819	P0085-01-A396-U133Plus-2.CEL	03/02/2004 19:23:00.000	TT2	U133Plus-P085	50.3226	female	white	IgG	4.7	1.3	1.8	135	3.7	8.3	75	80	19	0	1	1	64.8667	0	87.9	Training	0	0	0	1950-12-02	2001-02-05	2001-02-07	2006-06-07	2008-04-28		1	0	2006-06-07	2008-04-28	64	86
36	11861	P0090-01-A427-U133Plus-2.CEL	03/18/2004 11:23:00.000	TT2	U133Plus-P090	50.1963	male	white	IgG	4.8	16.2	0.9	84	4.5	6.4	15	7.5	0	1	0	0	81.1667	0	81.1667	Training	0	0	0	1951-08-10	2001-02-16	2001-08-31		2008-05-01		0	0	2008-05-01	2008-05-01	81	87
37	11642	P0091-01-A326-U133Plus-2.CEL	03/08/2004 11:42:00.000	TT2	U133Plus-P091	43.1874	female	white	IgA	1.6	2.2	0.6	127	4.6	13	5	30	11	0	1	0	90.6333	0	90.6333	Training	0	0	0	1957-12-18	2001-01-08	2001-01-12		2008-06-23		0	0	2008-06-23	2008-06-23	89	89
38	11666	P0092-01-A353-U133Plus-2.CEL	03/08/2004 20:11:00.000	TT2	U133Plus-P092	57.1421	male	white	IgG	1.7	3	1.2	149	3	10.3	50	30	10	1	0	1	20.5	1	26.2333	Training	1	1	0	1944-01-24	2001-01-16	2001-01-18	2002-09-25	2003-03-16	2003-03-16	1	1	2002-09-25	2003-03-16	20	26
39	11722	P0095-01-A355-U133Plus-2.CEL	03/13/2004 15:46:00.000	TT2	U133Plus-P095	56.3267	male	white	IgG	5.6	11.4	1.9	201	3.6	12.5	51	50		1	1	1	30.3	1	30.3	Training	1	0	0	1944-11-22	2001-01-19	2001-01-24		2003-07-22	2003-07-22	0	1	2003-07-22	2003-07-22	30	30
40	11537	P0096-01-A303-U133Plus-2.CEL	02/24/2004 18:17:00.000	TT2	U133Plus-P096	63.4015	female	other	IgG	7.6	10.9	2.6	276	4.1	9.1	56	70	3	0	0	1	37.7	1	49.4	Training	1	0	0	1937-10-17	2000-12-26	2001-01-08	2004-02-13	2005-01-29	2005-01-29	1	1	2004-02-13	2005-01-29	37	49
41	11602	P0098-01-A308-U133Plus-2.CEL	03/08/2004 20:23:00.000	TT2	U133Plus-P098	51.1187	female	white	IgG	11.9	33.1	0.8	141	2.1	8.8	94	80	3	0	1	1	76.2333	1	76.2333	Training	1	0	0	1950-01-06	2000-12-27	2000-12-29		2007-04-04	2007-04-04	0	1	2007-04-04	2007-04-04	76	76
42	11869	P0099-01-A425-U133Plus-2.CEL	03/15/2004 12:28:00.000	TT2	U133Plus-P099	44.0082	male	white	IgG	3.5	14.5	1	113	3.9	9.7	98	80	5	1	1	1	46.4333	1	66.6667	Training	1	0	0	1957-04-03	2001-02-15	2001-02-21	2004-12-15	2006-08-14	2006-08-14	1	1	2004-12-15	2006-08-14	46	66
43	11805	P0101-01-A383-U133Plus-2.CEL	03/13/2004 15:21:00.000	TT2	U133Plus-P101	69.4221	female	white	IgG	2.2	1.6	0.6	173	3.4	12	30	50	16	0	1	1	16.5333	1	24.8667	Training	0	1	0	1931-11-10	2001-01-30	2001-02-02	2002-06-13	2003-02-18	2003-02-18	1	1	2002-06-13	2003-02-18	16	25
44	11815	P0102-01-A388-U133Plus-2.CEL	03/02/2004 17:31:00.000	TT2	U133Plus-P102	57.7598	female	white	IgG	6.9	5.8	0.9	110	4.6	8.5	73	90	0	0	1	1	69.6333	1	78.9	Training	0	0	0	1943-07-02	2001-02-01	2001-02-06	2006-10-27	2007-08-01	2007-08-01	1	1	2006-10-27	2007-08-01	68	78
45	11834	P0103-01-A401-U133Plus-2.CEL	03/08/2004 12:19:00.000	TT2	U133Plus-P103	60.6891	male	white	IgG	1.8	3.5	0.8	198	3.9	13.8	5	4	0	1	0	1	76.3667	0	80.8333	Training	0	0	0	1940-08-19	2001-02-07	2001-02-26	2007-06-06	2007-10-18		1	0	2007-06-06	2007-10-18	76	80
46	11746	P0104-01-A366-U133Plus-2.CEL	03/17/2004 13:27:00.000	TT2	U133Plus-P104	54.6136	male	white	IgA	3.5	2.1	1.5	181	4.4	10.2	34	40	2	1	1	1	72.9333	0	84.6667	Training	0	0	0	1946-08-10	2001-01-23	2001-01-26	2007-01-23	2008-01-10		1	0	2007-01-23	2008-01-10	72	84
47	11810	P0107-01-A445-U133Plus-2.CEL	03/08/2004 21:26:00.000	TT2	U133Plus-P107	59.5745	male	white	IgA	2.5	39.5	1.1	191	3.3	10.1	45	40	24	1	0	0	89.3333	0	89.3333	Training	0	0	0	1941-09-24	2001-02-14	2001-02-21		2008-06-24		0	0	2008-06-24	2008-06-24	88	88
48	11817	P0111-01-A403-U133Plus-2.CEL	03/30/2004 16:30:00.000	TT2	U133Plus-P111	46.7014	male	white	IgG	1.3	11.1	1	146	4.9	15.2	20	45	32	1	1	1	14.8333	0	74.3667	Training	0	1	0	1955-09-28	2001-02-02	2002-04-25	2003-07-14	2008-06-03		1	0	2003-07-14	2008-06-03	15	88
49	11609	P0117-01-A315-U133Plus-2.CEL	03/13/2004 15:34:00.000	TT2	U133Plus-P117	57.7186	male	white	IgG	6.7	101	1.9	231	4.3	8.2	30	20	1	1	0	1	33.8	1	56.0667	Training	1	0	0	1943-06-21	2001-01-03	2001-01-11	2003-10-22	2005-08-20	2005-08-20	1	1	2003-10-22	2005-08-20	33	55
50	10162	P0118-01-A103-U133Plus-2.CEL	03/08/2004 21:13:00.000	TT2	U133Plus-P118	45.628	male	white	IgG	2.7	0.3	1	121	3.9	13.1	55	60	0	1	0	1	17.0333	1	21.0667	Training	1	1	1	1955-02-14	2000-08-16	2000-08-16	2002-01-09	2002-05-10	2002-05-10	1	1	2002-01-09	2002-05-10	17	21
51	3866	P0119-01-A196-U133Plus-2.CEL	02/26/2004 09:53:00.000	TT2	U133Plus-P119	54.3281	male	white	IgG	3.7	9.1	0.9	138	4.3	11.8	43	50	0	1	1	1	68.6	0	93.3333	Training	1	0	0	1946-08-14	1999-04-30	2000-10-18	2006-06-07	2008-06-18		1	0	2006-06-07	2008-06-18	68	110
52	10451	P0120-01-A284-U133Plus-2.CEL	02/20/2004 21:07:00.000	TT2	U133Plus-P120	45.8888	male	white	IgA	1.7	2.2	1.2	110	4.6	14.5	20	10	0	1	0	1	38.6667	1	52.2333	Training	1	0	0	1955-03-11	2000-10-31	2000-12-14	2004-02-17	2005-03-30	2005-03-30	1	1	2004-02-17	2005-03-30	38	53
53	10763	P0121-01-A289-U133Plus-2.CEL	03/13/2004 15:58:00.000	TT2	U133Plus-P121	59.7859	male	white	IgG	2.2	0.8	1.4	125	4.2	15	50	40	0	1	1	1	39.8667	0	91.2333	Training	0	0	0	1941-04-29	2000-11-30	2000-12-12	2004-03-22	2008-06-10		1	0	2004-03-22	2008-06-10	39	91
54	11535	P0122-01-A295-U133Plus-2.CEL	03/09/2004 09:37:00.000	TT2	U133Plus-P122	65.0789	male	white	IgG	3.5	1.8	1.7	148	4.3	12.5	96	80	32	1	0	0	91.2667	0	91.2667	Training	1	0	0	1936-01-20	2000-12-12	2000-12-14		2008-06-13		0	0	2008-06-13	2008-06-13	90	90
55	11601	P0124-01-A314-U133Plus-2.CEL	03/13/2004 15:09:00.000	TT2	U133Plus-P124	57.9602	male	white	IgG	2.3		1	136	4.4	9.6	26		2	1	1	1	35.9	0	85.6333	Training	0	0	0	1943-03-18	2000-12-27	2001-01-02	2003-12-15	2008-01-15		1	0	2003-12-15	2008-01-15	35	85
56	11898	P0127-01-A471-U133Plus-2.CEL	03/13/2004 16:11:00.000	TT2	U133Plus-P127	67.2478	male	white	IgG	3.8	1	1	143	4	10.6	40	50	0	1	1	1	10.0667	1	26.5	Training	1	1	0	1934-02-18	2001-03-02	2001-03-13	2002-01-09	2003-05-17	2003-05-17	1	1	2002-01-09	2003-05-17	10	26
57	11891	P0131-01-A476-U133Plus-2.CEL	03/18/2004 13:54:00.000	TT2	U133Plus-P131	64.906	male	white	IgG	1.6	1.1	0.9	122	4.6	14	16	20	1	1	0	0	88.4	0	88.4	Training	1	0	0	1936-07-20	2001-02-27	2001-03-13		2008-06-16		0	0	2008-06-16	2008-06-16	87	88
58	11574	P0138-01-A293-U133Plus-2.CEL	03/17/2004 14:17:00.000	TT2	U133Plus-P138	34.1853	male	other	IgG	1.7	2.8	0.9	124	4.3	14.3	42		2	1	1	0	90.5	0	90.5	Training	1	0	0	1966-11-17	2000-12-14	2000-12-20		2008-05-27		0	0	2008-05-27	2008-05-27	89	89
59	11911	P0144-01-A488-U133Plus-2.CEL	03/18/2004 13:36:00.000	TT2	U133Plus-P144	29.7049	female	white	IgG	1.4	2.3	0.6	130	4.2	13.2	30	30	0	0	0	0	85.8333	0	85.8333	Training	0	0	0	1971-09-25	2001-03-02	2001-05-10		2008-05-28		0	0	2008-05-28	2008-05-28	84	86
60	11952	P0154-01-A533-U133Plus-2.CEL	03/02/2004 18:20:00.000	TT2	U133Plus-P154	62.9485	female	white	IgG	3.3		0.7	287	4.5	12.3	12	15	26	0	1	1	19.0333	1	23.9667	Training	1	1	1	1938-06-13	2001-03-19	2001-03-23	2002-10-15	2003-03-12	2003-03-12	1	1	2002-10-15	2003-03-12	19	24
61	11928	P0155-01-A537-U133Plus-2.CEL	03/08/2004 20:48:00.000	TT2	U133Plus-P155	44.453	male	white	IgA	4.3	0.9	1.1	81	3.6	9.2	53	90	1	1	1	1	56.6	0	86	Training	0	0	0	1956-11-22	2001-03-20	2001-03-23	2005-11-15	2008-04-15		1	0	2005-11-15	2008-04-15	56	85
62	11969	P0157-01-A547-U133Plus-2.CEL	03/08/2004 22:04:00.000	TT2	U133Plus-P157	48.291	male	white	IgG	1.9	0.9	1	118	4.4	13.8	24	15	0	1	1	0	88.1	0	88.1	Training	0	0	0	1953-01-27	2001-03-21	2001-03-26		2008-06-20		0	0	2008-06-20	2008-06-20	87	87
63	11979	P0158-01-A554-U133Plus-2.CEL	03/18/2004 13:23:00.000	TT2	U133Plus-P158	64.6012	male	white	IgG	2.6	3.1	1.2	100	4.4	11.3	27	40	7	1	0	1	20.7667	1	43.8667	Training	1	1	0	1936-10-24	2001-03-23	2001-03-28	2002-12-11	2004-11-03	2004-11-03	1	1	2002-12-11	2004-11-03	21	44
64	12011	P0163-01-A575-U133Plus-2.CEL	03/08/2004 21:38:00.000	TT2	U133Plus-P163	62.641	male	white	IgG	2.7	6.9	0.8	153	4.4	12.6	47	50	3	1	1	1	56.6667	1	66.6	Training	1	0	0	1938-10-21	2001-03-29	2001-04-10	2005-12-05	2006-09-29	2006-09-29	1	1	2005-12-05	2006-09-29	56	66
65	12017	P0165-01-A596-U133Plus-2.CEL	03/02/2004 17:43:00.000	TT2	U133Plus-P165	49.7186	female	white	IgG	3.7	2.5	1.3	164	4.4	11.6	75	70	0	0	0	1	28.4	1	52.3333	Training	0	0	0	1951-10-04	2001-04-03	2001-05-04	2003-09-03	2005-08-21	2005-08-21	1	1	2003-09-03	2005-08-21	28	52
66	11740	P0168-01-A602-U133Plus-2.CEL	03/18/2004 15:05:00.000	TT2	U133Plus-P168	64.9307	male	white	IgG	1.6	0.9	1	149	4.8	14.2	11	10	1	1	0	1	65.6333	0	86.8667	Training	0	0	0	1936-07-30	2001-01-23	2001-05-01	2006-09-21	2008-06-19		1	0	2006-09-21	2008-06-19	64	89
67	12041	P0170-01-A609-U133Plus-2.CEL	03/14/2004 15:07:00.000	TT2	U133Plus-P170	43.0885	male	white	IgA	4	0.9	1.1	140	3.6	10.3	54	80	12	1	0	1	0.133333	1	9.1	Training	1	1	1	1958-04-24	2001-04-05	2001-04-13	2001-04-17	2002-01-11	2002-01-11	1	1	2001-04-17	2002-01-11	0	9
68	12032	P0171-01-A617-U133Plus-2.CEL	03/17/2004 13:15:00.000	TT2	U133Plus-P171	38.5999	female	other	IgA	1.6	7.7	0.7	104	3.4	10.2	40	50	1	0	1	1	19	1	19	Training	0	1	1	1962-10-15	2001-04-09	2001-04-13		2002-11-04	2002-11-04	0	1	2002-11-04	2002-11-04	19	19
69	12057	P0175-01-A638-U133Plus-2.CEL	02/20/2004 20:17:00.000	TT2	U133Plus-P175	55.3493	male	white	IgG	13.2	76.6	3.9	315	2.7	10.4	67	50	30	1	1	1	0	1	0	Training	1	1	1	1946-02-20	2001-04-03	2001-05-03		2001-05-03	2001-05-03	0	1	2001-05-03	2001-05-03	0	1
70	12042	P0176-01-A652-U133Plus-2.CEL	03/02/2004 19:10:00.000	TT2	U133Plus-P176	61.9163	male	other	FLC	2.2	30.2	1.4	308	4.1	11	22	20	26	1	0	0	87	0	87	Training	0	0	0	1939-07-19	2001-04-11	2001-04-17		2008-06-09		0	0	2008-06-09	2008-06-09	86	86
71	12122	P0187-01-A691-U133Plus-2.CEL	03/14/2004 15:20:00.000	TT2	U133Plus-P187	52.7522	female	white	IgA	4.4	0.9	0.9	233	4.7	11.8	91	90	2	0	1	1	21.6667	1	23.8667	Training	1	1	1	1948-09-16	2001-04-23	2001-04-26	2003-02-05	2003-04-12	2003-04-12	1	1	2003-02-05	2003-04-12	22	24
72	12170	P0199-01-A780-U133Plus-2.CEL	03/08/2004 21:01:00.000	TT2	U133Plus-P199	45.4413	male	white	IgG	5.5	20.9	5.5	326	3.9	10.6	80	90	12	1	1	1	39.8	1	39.8	Training	1	0	0	1956-01-19	2001-04-27	2001-05-14		2004-08-20	2004-08-20	0	1	2004-08-20	2004-08-20	39	40
73	9980	P0200-01-A776-U133Plus-2.CEL	03/17/2004 12:12:00.000	TT2	U133Plus-P200	68.7165	female	white	IgG	2.2	12.5	0.8	133	4	12.1	22	40	0	0	1	1	72.8333	1	72.8333	Training	1	0	0	1931-12-12	2000-06-21	2000-06-22		2006-06-16	2006-06-16	0	1	2006-06-16	2006-06-16	72	72
74	12179	P0202-01-A786-U133Plus-2.CEL	03/08/2004 21:51:00.000	TT2	U133Plus-P202	46.3281	female	white	IgA	2.5	0.9	1.1	135	3.1	9.6	60	60	0	0	0	0	86.1	0	86.1	Training	1	0	0	1955-03-03	2001-05-10	2001-05-15		2008-06-10		0	0	2008-06-10	2008-06-10	85	85
75	12210	P0208-01-A823-U133Plus-2.CEL	03/08/2004 19:20:00.000	TT2	U133Plus-P208	52.6726	male	other	IgG	1.8	4.5	1	125	4.3	12.9	70	20	47	1	0	1	47.4333	1	47.4333	Training	1	0	0	1948-11-06	2001-05-08	2001-05-18		2005-04-10	2005-04-10	0	1	2005-04-10	2005-04-10	47	47
76	3440	P0212-01-A838-U133Plus-2.CEL	03/08/2004 18:43:00.000	TT2	U133Plus-P212	46.4269	male	white	IgA	3.2	1	1.6	169	4.6	12	10	15	0	1	1	0	83.0333	0	83.0333	Training	0	0	0	1955-03-16	1998-08-13	2001-07-03		2008-04-28		0	0	2008-04-28	2008-04-28	81	116
77	12207	P0213-01-A840-U133Plus-2.CEL	03/18/2004 15:20:00.000	TT2	U133Plus-P213	54.5477	male	white	IgA	1.3	0.9	1	111	4.3	13.5	20	10	0	1	1	0	82.0333	0	82.0333	Training	1	0	0	1946-12-27	2001-04-20	2001-05-21		2008-02-15		0	0	2008-02-15	2008-02-15	81	82
78	12244	P0215-01-A862-U133Plus-2.CEL	03/08/2004 18:56:00.000	TT2	U133Plus-P215	54.2759	male	white	IgG	2.2	0.9	1.1	127	4.3	13.6	58	60		1	1	0	85.0667	0	85.0667	Training	1	0	0	1947-04-16	2000-07-01	2001-06-01		2008-05-27		0	0	2008-05-27	2008-05-27	83	94
79	12280	P0221-01-A882-U133Plus-2.CEL	03/08/2004 18:31:00.000	TT2	U133Plus-P221	39.4097	male	white	IgG	5.5	49.6	1	212	3.5	8.3	52	80	0	1	1	1	54.1	1	81.4667	Training	1	0	0	1962-02-17	2001-05-08	2001-06-07	2005-11-16	2008-02-15	2008-02-15	1	1	2005-11-16	2008-02-15	53	81
80	12248	P0222-01-A893-U133Plus-2.CEL	03/08/2004 18:18:00.000	TT2	U133Plus-P222	57.6362	female	white	IgG	3.5	0.9	1	250	5.1	12.7	77	70	1	0	0	1	45.7333	0	84.1333	Training	0	0	0	1943-12-08	2001-05-24	2001-05-31	2005-03-03	2008-04-28		1	0	2005-03-03	2008-04-28	46	83
81	12266	P0226-01-A901-U133Plus-2.CEL	03/08/2004 19:33:00.000	TT2	U133Plus-P226	41.3946	female	other	IgG	2.3	0.9	0.9	112	4.3	9.4	71	50	16	0	1	1	73.3667	1	73.3667	Training	0	0	0	1960-02-23	2001-01-31	2001-06-05		2007-06-15	2007-06-15	0	1	2007-06-15	2007-06-15	72	77
82	12291	P0232-01-A932-U133Plus-2.CEL	03/17/2004 13:52:00.000	TT2	U133Plus-P232	51.6019	female	white	IgA	4.1	3.1	0.7	206	5.1	12	90	60	23	0	0	0	74.7	0	74.7	Training	0	0	0	1949-12-26	2001-06-07	2001-06-12		2007-08-01		0	0	2007-08-01	2007-08-01	74	74
83	12344	P0237-01-A953-U133Plus-2.CEL	03/13/2004 16:23:00.000	TT2	U133Plus-P237	53.1256	male	white	IgG	3.3	1.4	0.9	131	4.1	11.7	40	60	12	1	1	0	78.9333	0	78.9333	Training	0	0	0	1948-06-25	2001-06-12	2001-06-18		2007-12-12		0	0	2007-12-12	2007-12-12	78	78
84	12337	P0239-01-A956-U133Plus-2.CEL	03/13/2004 16:35:00.000	TT2	U133Plus-P239	58.7124	male	other	IgG	4.8	7.4	1	241	4.6	8.5	73	90	0	1	0	0	84.8333	0	84.8333	Training	1	0	0	1942-11-25	2001-06-11	2001-06-14		2008-06-02		0	0	2008-06-02	2008-06-02	84	84
85	12329	P0241-01-A969-U133Plus-2.CEL	03/14/2004 14:55:00.000	TT2	U133Plus-P241	64.2636	male	white	IgG	5.7	12.3	1.2	196	3.9	9.2	87	30	0	1	1	1	15.1	1	15.1	Training	1	1	1	1937-05-17	2001-06-13	2001-06-18		2002-09-14	2002-09-14	0	1	2002-09-14	2002-09-14	15	15
86	12366	P0249-01-A990-U133Plus-2.CEL	03/18/2004 16:09:00.000	TT2	U133Plus-P249	44.7687	male	white	IgA	2.5	17	0.7	114	4.3	10.5	33	40	8	1	1	1	44.4	0	84.4667	Training	0	0	0	1956-11-02	2001-06-07	2001-06-26	2005-02-17	2008-06-03		1	0	2005-02-17	2008-06-03	44	84
87	12388	P0250-01-A992-U133Plus-2.CEL	02/20/2004 22:10:00.000	TT2	U133Plus-P250	54.059	female	other	IgA	2.6	23.5	0.4	181	4.1	12.8	35	45	20	0	1	1	70.4	0	85.3	Training	0	0	0	1947-07-25	2001-06-22	2001-06-22	2007-04-04	2008-06-24		1	0	2007-04-04	2008-06-24	70	84
88	12410	P0251-01-A994-U133Plus-2.CEL	03/14/2004 15:32:00.000	TT2	U133Plus-P251	64.5244	male	white	IgG	3	1.2	1	139	3.9	9.3	90	80	1	1	1	1	47.9333	1	74.7	Training	0	0	0	1937-02-18	2001-06-25	2001-06-25	2005-06-02	2007-08-14	2007-08-14	1	1	2005-06-02	2007-08-14	48	74
89	12455	P0254-01-B13-U133Plus-2.CEL	03/15/2004 16:05:00.000	TT2	U133Plus-P254	67.6047	male	white	IgG	5.6	35.4	1.2	194	2.9	12.5	96	95	63	1	0	0	84.2333	0	84.2333	Training	1	0	0	1934-01-26	2001-06-05	2001-06-28		2008-05-29		0	0	2008-05-29	2008-05-29	83	83
90	12389	P0255-01-B14-U133Plus-2.CEL	03/15/2004 16:32:00.000	TT2	U133Plus-P255	67.0913	female	white	IgA	3.7	1.6	0.6	193	4.9	13.5	50	60	37	0	1	1	43.6	1	55.2333	Training	1	0	0	1934-08-06	2001-06-08	2001-07-03	2005-01-31	2006-01-15	2006-01-15	1	1	2005-01-31	2006-01-15	42	55
91	12443	P0256-01-B16-U133Plus-2.CEL	03/08/2004 19:08:00.000	TT2	U133Plus-P256	52.1894	male	white	IgG	2.3	54.4	1.8	168	3.1	11	70	9	17	1	0	1	21.6	1	21.6	Training	0	1	1	1949-06-19	2001-06-06	2001-07-06		2003-04-15	2003-04-15	0	1	2003-04-15	2003-04-15	21	22
92	12465	P0259-01-B22-U133Plus-2.CEL	03/15/2004 17:03:00.000	TT2	U133Plus-P259	64.5573	female	white	IgG	5.3	1	1.2	243	4.3	10.3	34	40	13	0	1	1	7.5	1	7.5	Training	1	1	1	1937-02-20	2001-04-15	2001-07-09		2002-02-19	2002-02-19	0	1	2002-02-19	2002-02-19	7	10
93	12462	P0260-01-B33-U133Plus-2.CEL	03/09/2004 16:28:00.000	TT2	U133Plus-P260	44.3404	male	white	IgG	2.4	4.7	0.8	160	4	12.6	42	60	12	1	1	1	3.2	1	3.2	Training	0	1	1	1957-04-20	2001-07-09	2001-07-09		2001-10-13	2001-10-13	0	1	2001-10-13	2001-10-13	3	3
94	12481	P0265-01-B78-U133Plus-2.CEL	03/09/2004 13:56:00.000	TT2	U133Plus-P265	69.2711	female	white	IgA	1.8	1	0.7	173	4.2	12.8	4	20		0	0	1	23.8	1	23.8	Training	0	1	1	1932-06-26	2001-07-26	2001-07-26		2003-07-10	2003-07-10	0	1	2003-07-10	2003-07-10	24	24
96	12492	P0270-01-B91-U133Plus-2.CEL	03/08/2004 18:06:00.000	TT2	U133Plus-P270	39.8161	female	white	IgA	1.4	1	0.6	97	5	11.6	42	40	0	0	1	1	2.03333	0	83.4333	Training	1	1	0	1961-11-11	2001-06-13	2001-07-27	2001-09-26	2008-06-03		1	0	2001-09-26	2008-06-03	2	84
97	12581	P0271-01-B95-U133Plus-2.CEL	03/03/2004 08:05:00.000	TT2	U133Plus-P271	54.8195	male	white	IgA	5	11.3	1.6	194	4.1	9.7	60	90	36	1	1	0	82.0667	0	82.0667	Training	1	0	0	1946-11-23	2001-07-25	2001-07-25		2008-04-21		0	0	2008-04-21	2008-04-21	81	81
98	12533	P0272-01-B96-U133Plus-2.CEL	03/09/2004 15:27:00.000	TT2	U133Plus-P272	66.5148	male	white	IgA	5	10.4	1.2	164	4.7	10.1	50	50		1	1	1	41.8333	1	41.8333	Training	0	0	0	1935-03-28	2001-07-03	2001-07-27		2005-01-02	2005-01-02	0	1	2005-01-02	2005-01-02	42	42
99	12350	P0274-01-A993-U133Plus-2.CEL	03/16/2004 13:11:00.000	TT2	U133Plus-P274	70.4104	female	other	IgA	4.3	6.3	1.3	166	3	9.3	30	40	28	0	0	0	84.2	0	84.2	Training	0	0	0	1931-04-03	2001-06-21	2001-06-21		2008-05-21		0	0	2008-05-21	2008-05-21	83	83
100	12585	P0276-01-B120-U133Plus-2.CEL	02/25/2004 17:18:00.000	TT2	U133Plus-P276	52.2498	male	white	FLC	2.6	1	0.9	160	4.4	14.5	60	60	22	1	0	1	2.76667	1	2.76667	Training	1	1	1	1949-06-24	2001-08-02	2001-08-02		2001-10-24	2001-10-24	0	1	2001-10-24	2001-10-24	2	2
101	12656	P0277-01-B123-U133Plus-2.CEL	03/09/2004 17:18:00.000	TT2	U133Plus-P277	56.5161	male	white	FLC	18.1	54.4	2.9	179	3.9	10	40	50	31	1	0	1	1.6	1	1.6	Training	0	1	1	1945-03-28	2001-07-14	2001-08-07		2001-09-24	2001-09-24	0	1	2001-09-24	2001-09-24	1	2
102	12658	P0278-01-B133-U133Plus-2.CEL	02/26/2004 09:13:00.000	TT2	U133Plus-P278	61.6005	male	white	IgG	1.6	1.8	0.9	124	5	13.4	35	10	11	1	1	1	51.6	0	72.3333	Training	1	0	0	1940-03-08	2001-07-15	2001-08-13	2005-11-08	2007-07-23		1	0	2005-11-08	2007-07-23	51	72
103	10263	P0279-01-B132-U133Plus-2.CEL	03/17/2004 11:46:00.000	TT2	U133Plus-P279	48.3789	male	white	IgG	2	1	1.1	118	4	12.8	20	50	4	1	1	1	17.8	1	17.8	Training	0	1	1	1953-05-11	2000-09-18	2001-08-09		2003-01-25	2003-01-25	0	1	2003-01-25	2003-01-25	17	28
104	12642	P0280-01-B135-U133Plus-2.CEL	03/02/2004 18:08:00.000	TT2	U133Plus-P280	53.2135	male	white	IgG	4.1	1	1.6	151	4.1	9.2	75	90	1	1	0	1	24.3	1	37.8333	Training	1	0	0	1948-07-15	2001-07-11	2001-08-09	2003-08-08	2004-09-17	2004-09-17	1	1	2003-08-08	2004-09-17	24	38
105	12580	P0281-01-B136-U133Plus-2.CEL	03/18/2004 13:11:00.000	TT2	U133Plus-P281	55.4647	male	white	IgG	10.3	1	2.3	147	4.8	9.8	60	20	22	1	1	1	36.1333	1	36.1333	Training	0	0	0	1946-04-18	2001-07-02	2001-08-10		2004-07-29	2004-07-29	0	1	2004-07-29	2004-07-29	35	36
106	12695	P0283-01-B147-U133Plus-2.CEL	03/18/2004 15:34:00.000	TT2	U133Plus-P283	59.3219	male	white	IgG	8	1	2.7	255	3.6	9.5	25	40	2	1	1	1	10.3333	1	11.3	Training	1	1	1	1942-06-17	2001-07-20	2001-08-14	2002-06-20	2002-07-19	2002-07-19	1	1	2002-06-20	2002-07-19	10	12
107	12582	P0285-01-B127-U133Plus-2.CEL	03/18/2004 12:45:00.000	TT2	U133Plus-P285	73.3672	male	white	IgG	2.4	120.4	0.9	133	4.4	12.5	20	20	1	1	1	0	83.3	0	83.3	Training	0	0	0	2028-06-10	2001-08-10	2001-08-10		2008-06-13		0	0	2008-06-13	2008-06-13	82	82
108	12661	P0286-01-B157-U133Plus-2.CEL	03/30/2004 16:18:00.000	TT2	U133Plus-P286	69.2382	male	white	IgG	3.2	4.3	1.4	144	3.4	11.2	55	50	1	1	0	0	65.3667	0	65.3667	Training	0	0	0	1934-01-10	2001-08-10	2003-01-28		2008-06-11		0	0	2008-06-11	2008-06-11	65	82
109	12672	P0288-01-B169-U133Plus-2.CEL	03/24/2004 14:20:00.000	TT2	U133Plus-P288	53.7406	male	white	IgA	2.8	51.7	0.8	146	5.1	12.9	35	60	43	1	1	0	83.1	0	83.1	Training	1	0	0	1948-01-07	2001-08-21	2001-08-21		2008-06-18		0	0	2008-06-18	2008-06-18	82	82
110	12694	P0291-01-B172-U133Plus-2.CEL	02/26/2004 11:30:00.000	TT2	U133Plus-P291	55.418	male	other	IgG	1.7	10.4	1.1	178	4.9	12.5	30	20		1	0	0	77.7	0	77.7	Training	0	0	0	1946-10-11	2001-08-08	2002-01-16		2008-06-04		0	0	2008-06-04	2008-06-04	77	82
111	12761	P0296-01-B187-U133Plus-2.CEL	03/23/2004 16:03:00.000	TT2	U133Plus-P296	74.5395	male	white	IgG	3.2	12.5	1.3	156	3.6	11.9	36	80	8	1	1	1	80.7	0	82.9333	Training	1	0	0	2027-05-01	2001-06-23	2001-08-31	2008-04-17	2008-06-23		1	0	2008-04-17	2008-06-23	80	84
112	12824	P0299-01-B208-U133Plus-2.CEL	03/24/2004 15:10:00.000	TT2	U133Plus-P299	52.4036	female	white	IgG	1.7	5.2	0.6	140	3.5	11.8	12	10	4	0	0	0	82.2667	0	82.2667	Training	0	0	0	1949-06-03	2001-09-06	2001-09-06		2008-06-09		0	0	2008-06-09	2008-06-09	81	81
113	12813	P0301-01-B211-U133Plus-2.CEL	03/24/2004 16:25:00.000	TT2	U133Plus-P301	68.2279	male	white	IgA	4.3	1	1	132	4.3	12.7	40	80	0	1	1	1	47.9333	0	82.6333	Training	0	0	0	1933-08-26	2001-08-30	2001-09-10	2005-08-18	2008-06-24		1	0	2005-08-18	2008-06-24	47	82
114	12851	P0303-01-B218-U133Plus-2.CEL	03/24/2004 14:33:00.000	TT2	U133Plus-P303	57.9904	male	white	FLC	4.3	7.2	0.9	602	4.3	12.3	30	30	22	1	1	1	14.7667	1	14.7667	Training	1	1	1	1943-11-21	2001-08-02	2001-09-20		2002-12-07	2002-12-07	0	1	2002-12-07	2002-12-07	15	16
115	12766	P0307-01-B234-U133Plus-2.CEL	02/25/2004 16:13:00.000	TT2	U133Plus-P307	65.7268	female	white	IgG	5.4	2.9	0.7	138	4.5	9.2	80	70	3	0	0	1	32.7667	1	59.4667	Training	0	0	0	1936-03-12	2001-09-28	2001-09-28	2004-06-07	2006-08-17	2006-08-17	1	1	2004-06-07	2006-08-17	33	59
116	12865	P0308-01-B235-U133Plus-2.CEL	03/09/2004 14:20:00.000	TT2	U133Plus-P308	65.1311	male	white	IgA	2.8	1	1.3	93	3.9	7.8	73	60	0	1	1	1	10.8	1	67.1	Training	1	1	0	1936-11-08	2001-07-26	2001-10-22	2002-09-11	2007-04-27	2007-04-27	1	1	2002-09-11	2007-04-27	11	69
117	12938	P0313-01-B260-U133Plus-2.CEL	02/20/2004 21:20:00.000	TT2	U133Plus-P313	31.9808	male	white	IgA	2	4	0.8	117	5	12.1	35	50	9	1	0	1	64.3333	0	81.6333	Training	1	0	0	1969-11-19	2001-10-10	2001-10-10	2007-01-22	2008-06-24		1	0	2007-01-22	2008-06-24	63	80
118	12906	P0314-01-B267-U133Plus-2.CEL	03/02/2004 18:33:00.000	TT2	U133Plus-P314	58.8195	female	white	IgA	2.9	43	0.8	149	4.2	12.2	12	20	10	0	0	0	81.4	0	81.4	Training	0	0	0	1943-02-14	2001-08-21	2001-10-12		2008-06-19		0	0	2008-06-19	2008-06-19	80	82
119	12937	P0324-01-B287-U133Plus-2.CEL	03/09/2004 17:56:00.000	TT2	U133Plus-P324	50.9403	male	white	IgG	2.9	4.5	1.2	164	3.7	9.4	10	10	18	1	1	1	9.36667	0	81.0333	Training	1	1	0	1950-12-29	2001-09-02	2001-10-17	2002-07-25	2008-06-13		1	0	2002-07-25	2008-06-13	9	81
120	12990	P0330-01-B300-U133Plus-2.CEL	03/16/2004 14:41:00.000	TT2	U133Plus-P330	63.2588	female	other	IgG	2.5	6.7	0.8	120	3.8	11.1	20	20	0	0	1	0	80.0333	0	80.0333	Training	1	0	0	1938-10-22	2001-10-25	2001-11-21		2008-06-18		0	0	2008-06-18	2008-06-18	79	80
121	12915	P0332-01-B302-U133Plus-2.CEL	02/26/2004 09:28:00.000	TT2	U133Plus-P332	62.8991	male	white	IgG	4.3	1	2.3	234	4	9.6	4	4	45	1	1	1	6.43333	1	54.5	Training	0	1	0	1939-02-06	2001-09-26	2001-10-29	2002-05-10	2006-04-21	2006-04-21	1	1	2002-05-10	2006-04-21	7	55
122	13064	P0335-01-B312-U133Plus-2.CEL	03/09/2004 14:45:00.000	TT2	U133Plus-P335	52.7824	male	white	IgG	2.4	1	1	99	4.7	11.6	66	50	0	1	1	1	76.8667	0	80.4	Training	1	0	0	1949-03-14	2001-08-17	2001-11-02	2008-02-25	2008-06-10		1	0	2008-02-25	2008-06-10	75	82
123	13149	P0340-01-B324-U133Plus-2.CEL	03/09/2004 13:43:00.000	TT2	U133Plus-P340	68.3459	female	white	IgG	4.7	1	1	261	3.5	11.2	58	90	0	0	1	1	56.2667	0	80.2333	Training	1	0	0	1933-09-24	2001-11-19	2001-11-21	2006-07-06	2008-06-24		1	0	2006-07-06	2008-06-24	56	79
124	13121	P0343-01-B333-U133Plus-2.CEL	03/09/2004 13:17:00.000	TT2	U133Plus-P343	64.766	female	white	FLC	5.4	4.2	1.4	197	4.7	10.6	90	90	2	0	0	0	75.1333	0	75.1333	Training	0	0	0	1937-05-03	2001-08-13	2001-12-04		2008-02-05		0	0	2008-02-05	2008-02-05	74	78
125	13243	P0347-01-B346-U133Plus-2.CEL	03/24/2004 17:15:00.000	TT2	U133Plus-P347	56.2059	male	white	IgA	1.7	9.2	0.8	131	3.7	11.6	30	30	44	1	1	1	47.9667	1	58.1667	Training	0	0	0	1945-12-01	2001-11-29	2001-12-20	2005-11-28	2006-09-30	2006-09-30	1	1	2005-11-28	2006-09-30	47	58
126	13220	P0349-01-B347-U133Plus-2.CEL	03/24/2004 15:47:00.000	TT2	U133Plus-P349	60.3926	female	white	IgA	2.1	1.9	0.9	169	4.7	11.8	20	20	18	0	0	1	62.4	0	79.0333	Training	1	0	0	1941-09-29	2001-09-27	2001-12-21	2007-02-05	2008-06-18		1	0	2007-02-05	2008-06-18	62	81
127	13289	P0352-01-B352-U133Plus-2.CEL	02/26/2004 08:35:00.000	TT2	U133Plus-P352	55.1023	female	white	Nonsecretory		279	1.1	138	4.4	14.1	10	4	19	0	1	1	35.6333	0	78.8333	Training	1	0	0	1947-01-15	2000-06-29	2001-12-28	2004-12-01	2008-06-19		1	0	2004-12-01	2008-06-19	36	96
129	13291	P0355-01-B354-U133Plus-2.CEL	01/18/2004 13:34:00.000	TT2	U133Plus-P355	51.5305	female	other	IgG	2.4	1.2	1.1	147	4.7	10.7	88	70	0	0	0	0	78	0	78	Training	0	0	0	1950-08-18	2001-05-01	2002-01-07		2008-06-04		0	0	2008-06-04	2008-06-04	77	85
130	13261	P0357-01-B359-U133Plus-2.CEL	03/17/2004 11:59:00.000	TT2	U133Plus-P357	63.9451	female	white	IgG	2.1	1	0.9	232	4	16.5	50	50	1	0	0	1	31.9	1	31.9	Training	0	0	0	1938-04-02	2001-10-01	2002-01-08		2004-08-22	2004-08-22	0	1	2004-08-22	2004-08-22	31	34
131	13318	P0364-01-B383-U133Plus-2.CEL	01/21/2004 11:12:00.000	TT2	U133Plus-P364	40.6946	male	white	IgG	3.1	1	1.1	111	4.4	14.3	25	12.5	57	1	1	1	33.0667	1	33.0667	Training	0	0	0	1961-06-18	2001-11-15	2002-01-17		2004-10-05	2004-10-05	0	1	2004-10-05	2004-10-05	33	35
132	13332	P0365-01-B379-U133Plus-2.CEL	03/16/2004 14:53:00.000	TT2	U133Plus-P365	63.7035	female	white	FLC	8.6	68	2	427	4.5	10.4		70	38	0	1	1	9.4	1	15.6333	Training	1	1	1	1938-07-05	2001-12-03	2002-01-14	2002-10-23	2003-04-28	2003-04-28	1	1	2002-10-23	2003-04-28	9	16
133	13295	P0366-01-B382-U133Plus-2.CEL	03/26/2004 14:04:00.000	TT2	U133Plus-P366	68.6836	male	white	IgG	2.8	24.3	0.9	291	2.9	12.7	6	7.5	9	1	0	0	72.7667	0	72.7667	Training	0	0	0	1933-07-20	2001-11-14	2002-01-17		2008-01-09		0	0	2008-01-09	2008-01-09	72	74
134	13287	P0368-01-B385-U133Plus-2.CEL	02/24/2004 17:40:00.000	TT2	U133Plus-P368	61.6417	male	white	FLC	2.1	81.6	0.7	277	3.7	11.5	10	10	13	1	1	1	15.0667	1	15.0667	Training	0	1	1	1940-07-26	2001-10-23	2002-01-15		2003-04-12	2003-04-12	0	1	2003-04-12	2003-04-12	15	18
135	13233	P0371-01-B395-U133Plus-2.CEL	01/21/2004 11:59:00.000	TT2	U133Plus-P371	70.976	male	white	IgA	8.9	23.5	2.2	93	3.4	7.4	70	40	0	1	1	1	31.6333	1	39.4	Training	1	0	0	1931-04-15	2001-11-09	2002-01-25	2004-08-31	2005-04-21	2005-04-21	1	1	2004-08-31	2005-04-21	31	41
136	13389	P0374-01-B397-U133Plus-2.CEL	03/09/2004 17:31:00.000	TT2	U133Plus-P374	50.5669	female	white	FLC	2.3	4.1	1	156	4.9	14.2	40	20	4	0	0	1	42.2333	1	70	Training	0	0	0	1951-08-25	2001-12-28	2002-01-28	2005-07-18	2007-10-29	2007-10-29	1	1	2005-07-18	2007-10-29	42	70
137	13411	P0381-01-B409-U133Plus-2.CEL	03/03/2004 14:26:00.000	TT2	U133Plus-P381	58.8579	male	white	IgG	4.3	18	0.8	251	2.7	8.5	80	70	0	1	0	1	3.5	1	3.5	Training	0	1	1	1943-05-23	2002-01-26	2002-02-01		2002-05-17	2002-05-17	0	1	2002-05-17	2002-05-17	3	4
138	13339	P0385-01-B374-U133Plus-2.CEL	03/24/2004 15:35:00.000	TT2	U133Plus-P385	59.9506	male	white	IgA	3.2	11.6	0.6	197	3	10.4	10	10	34	1	0	1	10.7333	1	10.7333	Training	0	1	1	1942-04-03	2001-11-29	2002-01-15		2002-12-03	2002-12-03	0	1	2002-12-03	2002-12-03	11	13
139	13451	P0387-01-B418-U133Plus-2.CEL	02/25/2004 12:22:00.000	TT2	U133Plus-P387	44.9746	male	white	IgA	2.7	11.1	1	115	4.4	13.1	28	20	0	1	1	1	20.7667	1	55.2333	Training	0	1	0	1957-04-08	2002-02-11	2002-02-13	2003-10-29	2006-08-28	2006-08-28	1	1	2003-10-29	2006-08-28	20	54
140	13429	P0390-01-B423-U133Plus-2.CEL	03/16/2004 13:23:00.000	TT2	U133Plus-P390	53.7104	male	white	IgG	2.7	1.5	1	105	4	11.1	70	90	0	1	0	1	62.3667	0	77.3	Training	1	0	0	1948-07-22	2002-01-18	2002-02-13	2007-03-30	2008-06-20		1	0	2007-03-30	2008-06-20	61	77
141	13422	P0391-01-B424-U133Plus-2.CEL	03/16/2004 14:03:00.000	TT2	U133Plus-P391	49.3013	female	other	IgG	1.8	2.5	0.6	168	4.3	10.6	30	60	11	0	1	0	74	0	74	Training	1	0	0	1952-12-14	2001-10-31	2002-02-13		2008-03-13		0	0	2008-03-13	2008-03-13	73	77
142	13454	P0392-01-B427-U133Plus-2.CEL	02/24/2004 17:27:00.000	TT2	U133Plus-P392	63.0968	female	white	IgG	2.9	4.3	0.7	209	3.7	12	25	40	1	0	1	1	62.8333	1	62.8333	Training	1	0	0	1939-03-21	2002-01-16	2002-02-21		2007-04-21	2007-04-21	0	1	2007-04-21	2007-04-21	62	63
143	13458	P0393-01-B433-U133Plus-2.CEL	03/23/2004 15:13:00.000	TT2	U133Plus-P393	48.6589	female	white	IgG	2.2	1.8	0.7	85	3.8	11.5	35	30	0	0	1	0	76.5333	0	76.5333	Training	0	0	0	1953-08-11	2002-02-13	2002-02-19		2008-06-03		0	0	2008-06-03	2008-06-03	76	76
144	13540	P0397-01-B440-U133Plus-2.CEL	03/23/2004 12:49:00.000	TT2	U133Plus-P397	61.4852	male	white	IgG	10.1	39.8	1.3	176	3.6	9.7	50	70	15	1	1	1	20.7333	1	20.7333	Training	1	1	1	1940-11-01	2002-02-21	2002-02-25		2003-11-09	2003-11-09	0	1	2003-11-09	2003-11-09	21	21
145	13477	P0399-01-B442-U133Plus-2.CEL	03/09/2004 14:08:00.000	TT2	U133Plus-P399	54.4791	female	other	IgG	1.8	7.3	0.7	164	4.4	9.4			13	0	1	1	45.2	0	63.0667	Training	0	0	0	1947-10-30	2002-01-24	2002-02-27	2005-11-14	2007-05-04		1	0	2005-11-14	2007-05-04	45	64
146	13507	P0401-01-B444-U133Plus-2.CEL	02/20/2004 20:05:00.000	TT2	U133Plus-P401	48.1345	female	white	IgG	1.7	1	0.6	128	4.3	13.3	40	45	0	0	0	1	36.8	0	72.8667	Training	1	0	0	1954-02-26	2001-11-01	2002-02-27	2005-03-07	2008-02-22		1	0	2005-03-07	2008-02-22	37	75
147	13529	P0405-01-B449-U133Plus-2.CEL	03/09/2004 17:05:00.000	TT2	U133Plus-P405	56.3322	male	white	IgG	2.3	6.2	1	297	4.6	11.8	55	35	2	1	0	1	10.0333	1	14.3333	Training	1	1	1	1945-12-30	2002-01-28	2002-03-05	2002-12-31	2003-05-09	2003-05-09	1	1	2002-12-31	2003-05-09	9	16
148	13524	P0408-01-B457-U133Plus-2.CEL	03/09/2004 16:02:00.000	TT2	U133Plus-P408	35.9259	female	white	IgG	1.6	1	0.6	157	4.1	11.6	71	75	0	0	1	0	75.2333	0	75.2333	Training	0	0	0	1966-05-06	2002-01-14	2002-03-04		2008-05-08		0	0	2008-05-08	2008-05-08	74	76
149	13535	P0415-01-B480-U133Plus-2.CEL	02/24/2004 17:52:00.000	TT2	U133Plus-P415	60.7303	male	white	IgG	1.9	3.7	1.3	145	4.1	12	60	30	0	1	1	0	75.9	0	75.9	Training	0	0	0	1941-08-17	2002-03-05	2002-03-11		2008-06-04		0	0	2008-06-04	2008-06-04	75	75
150	13577	P0418-01-B487-U133Plus-2.CEL	02/25/2004 15:35:00.000	TT2	U133Plus-P418	60.1867	male	white	IgG	1.7	2.7	0.8	197	3.7	13.6	40	40	4	1	1	1	19.6333	1	19.6333	Training	1	1	1	1942-03-06	2001-12-08	2002-03-14		2003-10-24	2003-10-24	0	1	2003-10-24	2003-10-24	19	22
151	13316	P0420-01-B366-U133Plus-2.CEL	03/30/2004 16:05:00.000	TT2	U133Plus-P420	38.9019	male	white	IgA	1.5	6.3	1.1	109	4.8	12.2	50	70	14	1	0	1	53.7	0	77.2333	Training	1	0	0	1963-03-26	2002-01-04	2002-01-10	2006-06-09	2008-05-15		1	0	2006-06-09	2008-05-15	53	76
152	13569	P0421-01-B491-U133Plus-2.CEL	03/02/2004 20:00:00.000	TT2	U133Plus-P421	58.5422	male	white	IgA	2.1	3.8	0.5	103	4.4	11.3	80	80	0	1	0	0	75.8	0	75.8	Training	1	0	0	1943-11-03	2002-01-31	2002-03-22		2008-06-12		0	0	2008-06-12	2008-06-12	75	77
153	2094	P0426-01-B497-U133Plus-2.CEL	03/23/2004 14:36:00.000	TT2	U133Plus-P426	60.7248	female	white	IgG	4.1	2	0.7	131	3.6	11.5	40	60	6	0	1	1	40.8333	0	74.9333	Training	0	0	0	1941-09-04	1997-11-03	2002-03-27	2005-08-03	2008-05-22		1	0	2005-08-03	2008-05-22	41	126
154	13609	P0427-01-B498-U133Plus-2.CEL	02/25/2004 17:31:00.000	TT2	U133Plus-P427	55.4619	male	other	IgG	2.8	12.6	0.8	125	3.5	12.1	15	25	70	1	1	0	74.6	0	74.6	Training	0	0	0	1946-11-29	2002-03-19	2002-03-22		2008-05-07		0	0	2008-05-07	2008-05-07	74	74
155	13556	P0433-01-B517-U133Plus-2.CEL	02/20/2004 20:42:00.000	TT2	U133Plus-P433	46.6356	male	white	Nonsecretory	1.5	1	1	161	4.5	14.3	10	4	3	1	0	0	63.1667	0	63.1667	Training	0	0	0	1955-09-25	2002-02-04	2002-03-29		2007-06-06		0	0	2007-06-06	2007-06-06	63	64
157	13722	P0438-01-B529-U133Plus-2.CEL	03/15/2004 11:26:00.000	TT2	U133Plus-P438	57.8065	female	white	IgA	11.2	26.1	1.5	167	3.8	10	75	70		0	1	1	36.8	0	75	Training	1	0	0	1944-08-18	2002-02-26	2002-04-12	2005-04-20	2008-06-09		1	0	2005-04-20	2008-06-09	36	76
158	13678	P0440-01-B531-U133Plus-2.CEL	03/15/2004 17:31:00.000	TT2	U133Plus-P440	55.1736	female	white	IgG	2.1	49.7	0.8	432	4.6	12.6	75	80	2	0	0	0	74.7333	0	74.7333	Training	1	0	0	1947-04-02	2002-03-08	2002-04-10		2008-05-30		0	0	2008-05-30	2008-05-30	73	74
159	13662	P0446-01-B540-U133Plus-2.CEL	03/09/2004 15:50:00.000	TT2	U133Plus-P446	52.0439	female	white	FLC	1.9	20.7	0.8	244	4.2	14.3	15	5	22	0	1	0	67.4667	0	67.4667	Training	0	0	0	1950-05-22	2002-03-06	2002-04-16		2007-10-31		0	0	2007-10-31	2007-10-31	66	67
160	13746	P0447-01-B544-U133Plus-2.CEL	03/03/2004 15:34:00.000	TT2	U133Plus-P447	60.5738	female	white	FLC	2.8	7.2	0.9	155	4.9	13.4	60	60	1	0	0	1	24.7333	1	28.6667	Training	1	0	0	1941-11-18	2001-11-01	2002-04-16	2004-04-27	2004-08-23	2004-08-23	1	1	2004-04-27	2004-08-23	24	33
161	13752	P0451-01-B549-U133Plus-2.CEL	03/09/2004 16:53:00.000	TT2	U133Plus-P451	60.2334	female	white	FLC	4	31.4	1.3	234	4.5	10.8	4	95	40	0	0	1	12.8333	1	30.5667	Training	0	1	0	1942-03-24	2002-03-26	2002-04-18	2003-05-08	2004-10-21	2004-10-21	1	1	2003-05-08	2004-10-21	13	31
162	13773	P0454-01-B559-U133Plus-2.CEL	03/23/2004 13:39:00.000	TT2	U133Plus-P454	48.4008	male	white	FLC	1.6	3.1	1.1	146	4.8	14.1	40	40	1	1	0	0	57.1667	0	57.1667	Training	0	0	0	1955-01-29	2001-12-18	2003-05-07		2008-01-16		0	0	2008-01-16	2008-01-16	56	73
163	13681	P0457-01-B567-U133Plus-2.CEL	03/03/2004 15:22:00.000	TT2	U133Plus-P457	47.0803	female	white	IgA	2.2	1	0.7	103	4.9	12.9	30	80	0	0	1	1	63.0333	0	73.1667	Training	0	0	0	1955-05-10	2001-12-03	2002-04-22	2007-06-26	2008-04-25		1	0	2007-06-26	2008-04-25	62	76
164	13795	P0463-01-B585-U133Plus-2.CEL	02/26/2004 11:55:00.000	TT2	U133Plus-P463	69.7049	female	other	IgG	1.8	6.8	0.9	182	4.9	12.6	10	15	4	0	1	1	8.86667	1	9.86667	Training	0	1	1	1933-02-15	1999-07-28	2002-08-22	2003-05-15	2003-06-14	2003-06-14	1	1	2003-05-15	2003-06-14	9	47
165	13784	P0465-01-B587-U133Plus-2.CEL	02/20/2004 21:57:00.000	TT2	U133Plus-P465	48.313	male	white	IgG	3.1	8	0.8	169	4	11.2	64	80	35	1	1	1	21.6667	1	57.3	Training	1	1	0	1954-02-23	2002-03-02	2002-04-30	2004-02-09	2007-01-13	2007-01-13	1	1	2004-02-09	2007-01-13	22	58
166	13884	P0474-01-B614-U133Plus-2.CEL	03/02/2004 18:45:00.000	TT2	U133Plus-P474	39.9286	male	white	IgG	10.4	9.8	1.8	306	3.4	9.3	80	80	19	1	1	1	10.6667	1	12.2667	Training	1	1	1	1962-07-18	2002-04-09	2002-05-13	2003-03-29	2003-05-16	2003-05-16	1	1	2003-03-29	2003-05-16	10	13
167	13780	P0478-01-B608-U133Plus-2.CEL	03/04/2004 09:06:00.000	TT2	U133Plus-P478	67.0858	female	white	IgA	1.2	1	0.9	198	4.3	14	15	15	3	0	1	0	69.4333	0	69.4333	Training	0	0	0	1935-07-16	2002-02-12	2002-06-10		2008-02-22		0	0	2008-02-22	2008-02-22	68	72
168	13902	P0480-01-B616-U133Plus-2.CEL	03/03/2004 10:41:00.000	TT2	U133Plus-P480	60.7193	male	white	FLC	7.8	18.6	2.6	107	4.4	10	40	80	58	1	1	0	74.1	0	74.1	Training	0	0	0	1941-10-23	2002-04-22	2002-05-13		2008-06-13		0	0	2008-06-13	2008-06-13	73	74
169	13873	P0481-01-B617-U133Plus-2.CEL	03/15/2004 17:44:00.000	TT2	U133Plus-P481	57.7515	male	white	IgG	2.2	3.7	0.9	181	4.2	13.1	40	90	20	1	0	1	34.3333	1	34.3333	Training	0	0	0	1944-10-08	2002-04-12	2002-05-13		2005-03-08	2005-03-08	0	1	2005-03-08	2005-03-08	34	35
170	13887	P0482-01-B618-U133Plus-2.CEL	03/03/2004 11:48:00.000	TT2	U133Plus-P482	59.7337	male	white	IgG	2.5	16	1.2	123	4.2	12.7	25	20	2	1	1	1	70.9333	0	73.9	Training	1	0	0	1942-10-26	2002-04-25	2002-05-22	2008-03-19	2008-06-16		1	0	2008-03-19	2008-06-16	70	74
171	13934	P0487-01-B653-U133Plus-2.CEL	03/23/2004 15:26:00.000	TT2	U133Plus-P487	48.0439	female	white	IgG	2.2	11	0.9	139	3.8	9.4	70	70	0	0	1	0	73.9333	0	73.9333	Training	0	0	0	1954-06-30	2002-05-06	2002-05-29		2008-06-24		0	0	2008-06-24	2008-06-24	73	73
172	13900	P0490-01-B639-U133Plus-2.CEL	03/04/2004 08:41:00.000	TT2	U133Plus-P490	47.0062	female	white	FLC	14.1	8	3.6	154	3.4	9.4	28	30	7	0	1	0	72.3667	0	72.3667	Training	0	0	0	1955-07-07	2002-03-15	2002-05-23		2008-05-02		0	0	2008-05-02	2008-05-02	72	74
173	13798	P0492-02-B632-U133Plus-2.CEL	03/15/2004 16:20:00.000	TT2	U133Plus-P492-2	52.0714	male	white	Nonsecretory	1.1	2.1	0.7	181	4.2	14.7	5	4	0	1	1	0	64.8667	0	64.8667	Training	0	0	0	1950-06-16	2002-03-27	2002-05-21		2007-09-18		0	0	2007-09-18	2007-09-18	64	66
174	13966	P0495-01-B659-U133Plus-2.CEL	02/25/2004 16:26:00.000	TT2	U133Plus-P495	41.3644	male	white	IgG	2.3	46.6	0.8	144	3.8	12	50	90	3	1	0	0	73.3333	0	73.3333	Training	0	0	0	1961-03-04	2002-04-19	2002-06-04		2008-06-12		0	0	2008-06-12	2008-06-12	72	74
175	13979	P0501-01-B675-U133Plus-2.CEL	03/03/2004 12:13:00.000	TT2	U133Plus-P501	54.0398	female	other	IgA	8	4.4	1.3	463	4.1	6.7	90	90	22	0	1	1	28.4333	1	63.2333	Training	0	0	0	1948-07-21	2002-06-12	2002-06-12	2004-10-12	2007-08-22	2007-08-22	1	1	2004-10-12	2007-08-22	28	62
176	14050	P0502-01-B678-U133Plus-2.CEL	03/03/2004 11:36:00.000	TT2	U133Plus-P502	46.0645	male	other	FLC	1.6	3.1	0.7	336	3.9	11.7	15		0	1	1	0	72.5333	0	72.5333	Training	1	0	0	1956-07-10	2002-06-18	2002-06-18		2008-06-02		0	0	2008-06-02	2008-06-02	72	72
177	14038	P0503-01-B683-U133Plus-2.CEL	03/15/2004 12:41:00.000	TT2	U133Plus-P503	57.4386	male	white	IgG	1.5	2	1	192	4.1	12.9	50	15	45	1	0	1	33.4667	1	55.5	Training	1	0	0	1945-03-07	2002-06-18	2002-06-18	2005-03-18	2007-01-08	2007-01-08	1	1	2005-03-18	2007-01-08	33	55
178	13952	P0504-01-B690-U133Plus-2.CEL	03/09/2004 16:15:00.000	TT2	U133Plus-P504	55.1709	female	white	IgG	11.4	1	1.5	176	3.8	10.9	45	85	1	0	0	1	16.7333	1	17.2667	Training	0	1	1	1947-06-13	2002-06-20	2002-06-20	2003-11-04	2003-11-20	2003-11-20	1	1	2003-11-04	2003-11-20	17	17
179	14053	P0508-01-B697-U133Plus-2.CEL	03/03/2004 15:46:00.000	TT2	U133Plus-P508	68.3569	male	white	IgA	9.7	4.4	2.6	80	3.2	7.8	85	80	9	1	1	1	29.3667	0	72.6333	Training	0	0	0	1934-04-24	2002-06-25	2002-06-25	2004-11-22	2008-06-12		1	0	2004-11-22	2008-06-12	29	72
180	14073	P0510-01-B703-U133Plus-2.CEL	03/16/2004 12:58:00.000	TT2	U133Plus-P510	41.7076	male	white	IgA	4.3	1	1	96	4.5	9	55	60	0	1	1	1	10.3	0	65.1333	Training	1	1	0	1960-11-26	2002-07-01	2002-07-01	2003-05-06	2007-11-06		1	0	2003-05-06	2007-11-06	10	64
181	14060	P0511-01-B707-U133Plus-2.CEL	02/25/2004 15:47:00.000	TT2	U133Plus-P511	66.663	female	white	IgG	13.1	24.6	2	162	2.5	7.3	95	90	2	0	0	0	72.1	0	72.1	Training	0	0	0	1936-01-09	2002-07-03	2002-07-03		2008-06-04		0	0	2008-06-04	2008-06-04	71	71
182	14056	P0517-01-B715-U133Plus-2.CEL	03/09/2004 14:58:00.000	TT2	U133Plus-P517	59.1929	female	white	IgG	2.4	6.8	0.9	180	4.5	11.3	60	20	12	0	0	0	72.5333	0	72.5333	Training	0	0	0	1943-06-28	2002-07-03	2002-07-09		2008-06-23		0	0	2008-06-23	2008-06-23	71	71
183	14004	P0521-02-D162-U133Plus-2.CEL	09/08/2004 14:15:00.000	TT3	U133Plus-P521-2	55	male	white	IgG	2	3.8	0.9	115	4.3	12.1	20	20	0	1	0	0	47.6	0	47.6	Validation	1	0	0	1949-04-13	2002-06-04	2004-07-15		2008-06-12		0	0	2008-06-12	2008-06-12	47	72
184	14079	P0522-01-B730-U133Plus-2.CEL	02/20/2004 21:45:00.000	TT2	U133Plus-P522	53.7323	female	white	FLC	3	25	1.9	233	4.3	11.4	4	4	72	0	0	0	72.1667	0	72.1667	Training	0	0	0	1948-12-07	2002-07-09	2002-07-09		2008-06-12		0	0	2008-06-12	2008-06-12	71	71
185	14078	P0526-01-B738-U133Plus-2.CEL	03/03/2004 12:00:00.000	TT2	U133Plus-P526	55.9369	male	white	IgA	7.7	2.3	1.6	134	4.5	10.5	70	70		1	1	0	71.6333	0	71.6333	Training	0	0	0	1943-10-03	2002-07-15	2002-07-16		2008-06-03		0	0	2008-06-03	2008-06-03	71	71
186	14106	P0535-01-B765-U133Plus-2.CEL	02/25/2004 16:39:00.000	TT2	U133Plus-P535	49.0295	female	white	IgA	1.4	1.1	0.7	132	4.6	10.1	45	30	0	0	1	1	52.9667	0	71.6667	Training	1	0	0	1953-09-01	2002-07-25	2002-07-25	2006-11-30	2008-06-13		1	0	2006-11-30	2008-06-13	52	71
187	14108	P0536-01-B763-U133Plus-2.CEL	03/16/2004 14:28:00.000	TT2	U133Plus-P536	59.2231	male	white	FLC	4.3	5.8	1.6	208	4.7	13.2	90	60	44	1	0	1	40.9	1	60.0667	Training	0	0	0	1943-07-01	2002-07-22	2002-07-23	2005-12-01	2007-06-29	2007-06-29	1	1	2005-12-01	2007-06-29	41	59
188	13789	P0538-01-B760-U133Plus-2.CEL	03/23/2004 15:38:00.000	TT2	U133Plus-P538	49.8037	female	white	IgG	1.6	1	1	181	4.5	11.3	25	30	0	0	1	1	33.3667	0	71.4	Training	0	0	0	1952-11-21	2002-04-26	2002-07-23	2005-04-19	2008-06-03		1	0	2005-04-19	2008-06-03	33	74
189	14146	P0541-01-B792-U133Plus-2.CEL	02/20/2004 22:35:00.000	TT2	U133Plus-P541	57.3425	female	white	IgA	1.8	16.8	0.7	248	3.4	11.4	15	15	11	0	1	0	70.8	0	70.8	Training	0	0	0	1945-05-29	2002-08-05	2002-08-05		2008-05-29		0	0	2008-05-29	2008-05-29	69	69
190	14134	P0549-01-B776-U133Plus-2.CEL	03/03/2004 14:44:00.000	TT2	U133Plus-P549	47.8435	male	white	Nonsecretory	6.3	1	1.3	207	4.4	14.5	30	50	19	1	1	1	53.4667	0	70.7	Training	0	0	0	1954-11-20	2002-07-17	2002-08-07	2006-12-28	2008-05-28		1	0	2006-12-28	2008-05-28	52	70
191	14133	P0556-01-B807-U133Plus-2.CEL	03/03/2004 12:25:00.000	TT2	U133Plus-P556	55.7941	female	white	IgG	1.9	4.9	0.6	171	3.9	11.6	50	40	5	0	1	0	71.2333	0	71.2333	Training	0	0	0	1946-12-14	2002-08-05	2002-08-05		2008-06-11		0	0	2008-06-11	2008-06-11	70	70
192	14141	P0559-01-B814-U133Plus-2.CEL	03/04/2004 12:06:00.000	TT2	U133Plus-P559	65.3644	female	white	IgG	7.5	20.6	1.8	192	4	8.7	12.5	60		0	0	0	70.3333	0	70.3333	Training	0	0	0	1937-06-05	2002-07-18	2002-08-12		2008-05-22		0	0	2008-05-22	2008-05-22	69	70
193	14122	P0561-01-B827-U133Plus-2.CEL	03/04/2004 12:38:00.000	TT2	U133Plus-P561	63.1105	female	white	IgG	2.3	7.7	0.7	240	4.5	9.6	12.5	10	10	0	1	0	70.4333	0	70.4333	Training	0	0	0	1939-09-11	2002-07-11	2002-08-09		2008-05-22		0	0	2008-05-22	2008-05-22	69	70
194	14147	P0562-01-B829-U133Plus-2.CEL	03/03/2004 11:23:00.000	TT2	U133Plus-P562	56.4146	male	other	FLC	4.6	36.5	2.2	202	4.4	9.6	7.5	20	4	1	0	1	36.9333	1	36.9333	Training	0	0	0	1946-05-10	2002-07-19	2002-08-13		2005-08-25	2005-08-25	0	1	2005-08-25	2005-08-25	36	37
195	14183	P0563-01-B831-U133Plus-2.CEL	03/03/2004 15:09:00.000	TT2	U133Plus-P563	36.0577	female	white	IgA	2	15.8	0.8	123	3.9	12.7	25	25	0	0	1	1	48.8667	0	69.3	Training	1	0	0	1966-09-28	2002-08-02	2002-09-13	2006-09-18	2008-05-23		1	0	2006-09-18	2008-05-23	48	69
196	14214	P0564-01-B836-U133Plus-2.CEL	03/03/2004 14:57:00.000	TT2	U133Plus-P564	31.8216	female	other	IgG	1.7	14.2	0.7	136	3.9	12.2	50	15	2	0	1	0	71.0333	0	71.0333	Training	1	0	0	1970-11-24	2002-08-13	2002-08-19		2008-06-19		0	0	2008-06-19	2008-06-19	70	70
197	14213	P0565-01-B840-U133Plus-2.CEL	02/20/2004 21:32:00.000	TT2	U133Plus-P565	61.7021	female	white	IgG	19.7	12.1	8.4	153	4	8.3	40	50	0	0	0	1	41.2333	1	41.2333	Training	0	0	0	1941-02-02	2002-08-12	2002-08-16		2006-01-04	2006-01-04	0	1	2006-01-04	2006-01-04	41	41
198	14113	P0566-01-B843-U133Plus-2.CEL	03/04/2004 08:53:00.000	TT2	U133Plus-P566	53.4962	female	white	IgA	4.5	1	1	99	3.5	9.6	70	70	17	0	0	1	7.03333	1	7.03333	Training	1	1	1	1949-04-13	2002-07-10	2002-08-19		2003-03-18	2003-03-18	0	1	2003-03-18	2003-03-18	7	8
199	14112	P0569-01-B853-U133Plus-2.CEL	03/03/2004 13:50:00.000	TT2	U133Plus-P569	40.7467	female	other	IgG	1.9	28.8	0.6	214	3.9	10.6	40	45	0	0	1	0	60.9333	0	60.9333	Training	0	0	0	1962-02-24	2002-07-10	2002-10-14		2007-10-16		0	0	2007-10-16	2007-10-16	60	63
200	14219	P0575-01-B869-U133Plus-2.CEL	02/20/2004 19:53:00.000	TT2	U133Plus-P575	58.8909	female	white	FLC	38.7	52	7.4	181	2.4	11.8	60	45	16	0	1	1	10.6667	1	10.6667	Training	0	1	1	1943-12-11	2002-08-14	2002-09-03		2003-07-20	2003-07-20	0	1	2003-07-20	2003-07-20	10	11
201	14437	P0577-01-B877-U133Plus-2.CEL	02/26/2004 12:08:00.000	TT2	U133Plus-P577	70.9183	female	white	IgA	22.4	2.9	7.9	99	3.8	8.4	55	65	37	0	0	1	19.3333	1	32.4333	Training	0	1	0	1931-12-14	2002-08-20	2002-09-04	2004-04-06	2005-05-04	2005-05-04	1	1	2004-04-06	2005-05-04	19	33
202	14504	P0584-01-B895-U133Plus-2.CEL	03/02/2004 18:58:00.000	TT2	U133Plus-P584	66.4379	male	white	IgA	4.4	5.5	2.2	106	3.8	9.6	70	55	0	1	0	0	68.9667	0	68.9667	Training	1	0	0	1936-06-18	2002-09-05	2002-09-20		2008-05-20		0	0	2008-05-20	2008-05-20	68	68
203	14529	P0592-01-B913-U133Plus-2.CEL	03/03/2004 11:11:00.000	TT2	U133Plus-P592	37.2464	male	white	IgG	1.3	3.2	1	244	4.1	13	10	7.5	16	1	1	0	70	0	70	Training	0	0	0	1965-08-02	2002-09-13	2002-09-24		2008-06-24		0	0	2008-06-24	2008-06-24	69	69
204	14534	P0597-01-B918-U133Plus-2.CEL	03/02/2004 19:35:00.000	TT2	U133Plus-P597	60.7989	male	white	IgA	8.5	113.4	1.3	290	2.5	9.1	75	35	33	1	1	1	5.83333	1	5.83333	Training	1	1	1	1942-02-12	2002-09-16	2002-10-01		2003-03-25	2003-03-25	0	1	2003-03-25	2003-03-25	5	6
205	14530	P0598-01-B924-U133Plus-2.CEL	02/20/2004 22:22:00.000	TT2	U133Plus-P598	44.2581	female	other	IgG	2.9	15.1	0.7	184	3.6	10.5	80	65	2	0	0	0	64.1333	0	64.1333	Training	0	0	0	1958-08-14	2002-09-13	2002-10-03		2008-01-09		0	0	2008-01-09	2008-01-09	63	64
206	14562	P0600-01-B925-U133Plus-2.CEL	02/20/2004 20:30:00.000	TT2	U133Plus-P600	47.6431	male	white	IgA	1	1	0.9	182	4.3	12.4	45	30	39	1	1	1	7.16667	1	11.4333	Training	0	1	1	1955-03-30	2002-09-25	2002-10-03	2003-05-06	2003-09-11	2003-09-11	1	1	2003-05-06	2003-09-11	7	12
207	14561	P0604-01-B933-U133Plus-2.CEL	03/04/2004 09:51:00.000	TT2	U133Plus-P604	64.6809	male	white	FLC	17.8	37.1	5.8	222	4.2	9.2		80	5	1	1	1	47.5	0	63.1333	Training	0	0	0	1938-04-16	2002-09-25	2002-10-17	2006-09-11	2007-12-24		1	0	2006-09-11	2007-12-24	47	63
208	14605	P0610-01-B949-U133Plus-2.CEL	02/25/2004 16:00:00.000	TT2	U133Plus-P610	72.4557	male	white	IgG	1.8	2.9	0.9	159	3.9	13.4	35	17.5		1	0	0	68.3667	0	68.3667	Training	0	0	0	1930-07-21	2002-10-08	2002-10-23		2008-06-04		0	0	2008-06-04	2008-06-04	68	68
209	14642	P0614-01-B961-U133Plus-2.CEL	03/03/2004 16:36:00.000	TT2	U133Plus-P614	67.2066	male	white	IgA	11.4	39.7	1.8	96	3.5	8.5	70	80	0	1	1	1	4.86667	1	4.86667	Training	0	1	1	1935-10-21	2002-10-28	2002-10-29		2003-03-24	2003-03-24	0	1	2003-03-24	2003-03-24	5	5
210	14723	P0625-01-C25-U133Plus-2.CEL	03/15/2004 15:27:00.000	TT2	U133Plus-P625	66.4406	male	white	IgG	3.1	1	1.1	181	4.8	14.4	65	80	3	1	1	0	67.7667	0	67.7667	Training	1	0	0	1936-08-19	2002-11-09	2002-11-22		2008-06-16		0	0	2008-06-16	2008-06-16	67	67
211	14830	P0630-01-C66-U133Plus-2.CEL	03/16/2004 15:21:00.000	TT2	U133Plus-P630	52.1428	male	white	IgG	1.9	1	1	153	4.8	13.1	7.5	5	3	1	1	1	26.6333	1	32.1667	Training	0	0	0	1951-01-06	2002-12-10	2003-01-06	2005-03-15	2005-08-28	2005-08-28	1	1	2005-03-15	2005-08-28	26	32
212	14698	P0631-01-C61-U133Plus-2.CEL	03/15/2004 11:51:00.000	TT2	U133Plus-P631	65.5731	male	white	IgA	1.6	12.3	0.9	210	4.9	15	5	5	11	1	0	1	35.4	1	38	Training	0	0	0	1937-07-28	2002-11-06	2002-12-19	2005-11-15	2006-02-01	2006-02-01	1	1	2005-11-15	2006-02-01	35	39
213	14833	P0635-01-C75-U133Plus-2.CEL	03/03/2004 09:57:00.000	TT2	U133Plus-P635	61.208	male	white	IgD	2.4	21.6	0.7	151	4.1	13.1	40	15	39	1	0	1	43.4333	0	65.6	Training	0	0	0	1942-01-06	2002-12-10	2003-01-21	2006-08-16	2008-06-11		1	0	2006-08-16	2008-06-11	43	66
214	14803	P0636-01-C46-U133Plus-2.CEL	03/16/2004 17:01:00.000	TT2	U133Plus-P636	24.8291	male	other	IgA	2.5	4.2	0.9	113	4.7	9.2	15	7.5	0	1	0	0	63.5	0	63.5	Training	0	0	0	1978-03-15	2002-12-02	2002-12-18		2008-03-06		0	0	2008-03-06	2008-03-06	63	63
215	14893	P0640-01-C085-U133Plus-2.CEL	03/30/2004 15:53:00.000	TT2	U133Plus-P640	62.8277	male	white	IgG	2.8	27.7	0.8	266	4.5	13.3	30	80	10	1	0	1	5.36667	1	5.36667	Training	1	1	1	1940-05-14	2003-01-03	2003-01-09		2003-06-19	2003-06-19	0	1	2003-06-19	2003-06-19	5	5
216	14835	P0642-01-C91-U133Plus-2.CEL	03/16/2004 17:51:00.000	TT2	U133Plus-P642	48.2032	female	white	FLC	4	33.4	1	171	4.5	10	70	80	5	0	1	0	66.5333	0	66.5333	Training	0	0	0	1954-12-11	2002-12-11	2003-01-06		2008-06-24		0	0	2008-06-24	2008-06-24	65	66
217	14891	P0647-01-C94-U133Plus-2.CEL	02/20/2004 19:28:00.000	TT2	U133Plus-P647	63.0913	female	white	IgG	3	3.5	1.2	319	3.8	9.9	74	80	0	0	1	0	65.8	0	65.8	Training	1	0	0	1940-02-06	2003-01-02	2003-01-07		2008-06-03		0	0	2008-06-03	2008-06-03	65	65
218	14765	P0649-01-C40-U133Plus-2.CEL	03/24/2004 19:00:00.000	TT2	U133Plus-P649	59.8929	male	white	IgG	4.1	19.2	1	183	2.8	9.9	30	35	37	1	1	1	0.433333	1	58.6667	Training	1	1	0	1943-03-12	2002-11-18	2002-12-03	2002-12-16	2007-09-28	2007-09-28	1	1	2002-12-16	2007-09-28	0	58
219	14945	P0651-01-C97-U133Plus-2.CEL	03/16/2004 18:41:00.000	TT2	U133Plus-P651	65.5786	female	white	IgA	1.6	15	0.7	164	3.8	14.7	7.5	5	11	0	1	0	66.3	0	66.3	Training	0	0	0	1937-08-20	2003-01-13	2003-01-13		2008-06-24		0	0	2008-06-24	2008-06-24	65	65
220	14766	P0653-01-C42-U133Plus-2.CEL	03/26/2004 14:41:00.000	TT2	U133Plus-P653	53.0872	male	other	IgG	3.1	1	1	105	3.3	13.8	35	30	10	1	1	0	66.1667	0	66.1667	Training	0	0	0	1950-02-07	2002-11-18	2003-01-17		2008-06-24		0	0	2008-06-24	2008-06-24	65	67
221	14750	P0655-01-C49-U133Plus-2.CEL	03/16/2004 15:33:00.000	TT2	U133Plus-P655	60.6287	male	white	IgG	1.5	4.2	1.1	195	3	10.6	20	7.5	8	1	1	0	66.0333	0	66.0333	Training	0	0	0	1942-07-03	2002-11-14	2002-12-19		2008-05-22		0	0	2008-05-22	2008-05-22	65	66
222	14696	P0657-01-C14-U133Plus-2.CEL	03/16/2004 17:14:00.000	TT2	U133Plus-P657	66.8936	male	white	IgG	1.9	5.9	1.3	179	4.5	13.8	12.5	7.5	1	1	1	0	66	0	66	Training	0	0	0	1936-03-20	2002-11-06	2002-12-05		2008-05-07		0	0	2008-05-07	2008-05-07	65	66
223	14658	P0658-01-B967-U133Plus-2.CEL	03/16/2004 16:23:00.000	TT2	U133Plus-P658	68.1894	female	other	IgG	1.6	1	0.6	127	4.4	12.2	10	7.5	14	0	0	1	38.4333	1	38.4333	Training	0	0	0	1934-12-04	2002-10-31	2002-12-05		2006-01-31	2006-01-31	0	1	2006-01-31	2006-01-31	37	39
224	14608	P0659-01-B957-U133Plus-2.CEL	03/24/2004 18:23:00.000	TT2	U133Plus-P659	58.3665	male	white	IgA	1.9	5	1.2	132	4.6	12	40	35	0	1	0	0	61.2333	0	61.2333	Training	1	0	0	1944-09-18	2002-10-08	2002-12-03		2007-12-14		0	0	2007-12-14	2007-12-14	60	62
225	14773	P0663-01-C52-U133Plus-2.CEL	03/24/2004 17:27:00.000	TT2	U133Plus-P663	60.3761	female	white	FLC	1.7	13.5	0.7	264	4.1	11.5	65	25	27	0	1	1	48.7	1	51.7	Training	0	0	0	1942-09-26	2002-11-20	2002-12-12	2006-12-12	2007-03-12	2007-03-12	1	1	2006-12-12	2007-03-12	48	52
227	14951	P0666-01-C104-U133Plus-2.CEL	03/24/2004 16:37:00.000	TT2	U133Plus-P666	50.9485	female	white	IgG	2.6	3	0.8	100	3.9	11	60	70	3	0	1	0	61.7667	0	61.7667	Training	0	0	0	1952-03-25	2003-01-14	2003-01-15		2008-02-11		0	0	2008-02-11	2008-02-11	61	61
228	14921	P0667-01-C98-U133Plus-2.CEL	03/16/2004 17:26:00.000	TT2	U133Plus-P667	38.4434	male	white	IgA	1	3.8	0.6	159	5.2	13.8	27.5	27.5	28	1	0	1	25.2667	0	66.3	Training	0	0	0	1964-09-11	2003-01-09	2003-01-13	2005-02-09	2008-06-24		1	0	2005-02-09	2008-06-24	25	65
229	14869	P0669-01-C95-U133Plus-2.CEL	03/24/2004 16:13:00.000	TT2	U133Plus-P669	71.1544	male	white	IgG	3.2	1.7	1	201	3.9	11.8	45	40	5	1	0	1	50.1667	0	65.7333	Training	0	0	0	1932-02-13	2002-12-30	2003-01-29	2007-03-14	2008-06-23		1	0	2007-03-14	2008-06-23	50	66
230	14967	P0670-01-C132-U133Plus-2.CEL	02/20/2004 23:37:00.000	TT2	U133Plus-P670	53.7543	male	other	IgG	2.8	3	1.2	166	2.9	13.3	65	50	21	1	0	0	65.5333	0	65.5333	Training	1	0	0	1949-06-21	2003-01-17	2003-01-29		2008-06-17		0	0	2008-06-17	2008-06-17	65	65
231	15019	P0672-01-C147-U133Plus-2.CEL	03/24/2004 19:12:00.000	TT2	U133Plus-P672	55.1956	male	white	IgA	2.9	9.3	1.1	145	4	14	25	17.5	3	1	1	0	64.6667	0	64.6667	Training	0	0	0	1948-01-19	2003-01-29	2003-02-04		2008-05-28		0	0	2008-05-28	2008-05-28	63	64
232	14899	P0673-01-C144-U133Plus-2.CEL	03/24/2004 16:50:00.000	TT2	U133Plus-P673	70.9046	male	white	IgG	13.8	1	2.3	249	4.5	11.5	40	80		1	0	1	18.0667	1	21.3667	Training	0	1	1	1932-05-16	2003-01-06	2003-01-31	2004-07-26	2004-11-02	2004-11-02	1	1	2004-07-26	2004-11-02	18	22
234	14980	P0678-01-C118-U133Plus-2.CEL	03/24/2004 18:11:00.000	TT2	U133Plus-P678	69.5676	female	white	IgG	2	4.7	0.7	117	4.2	10.9	65	7.5	0	0	1	1	39.1333	0	65.8333	Training	0	0	0	1933-09-07	2003-01-21	2003-01-23	2006-04-11	2008-06-20		1	0	2006-04-11	2008-06-20	39	65
235	14906	P0681-01-C86-U133Plus-2.CEL	02/26/2004 09:01:00.000	TT2	U133Plus-P681	65.7982	female	white	IgA	6.1	8.6	1.3	177	4.5	8.6	80	60		0	1	0	66.3667	0	66.3667	Training	1	0	0	1937-05-26	2003-01-07	2003-01-07		2008-06-20		0	0	2008-06-20	2008-06-20	65	65
236	14941	P0684-01-C114-U133Plus-2.CEL	02/20/2004 22:47:00.000	TT2	U133Plus-P684	64.162	female	white	IgA	1.5	23.9	0.6	185	4.2	9.1	30	25	15	0	0	1	54.8	0	66.1333	Training	1	0	0	1939-01-22	2003-01-13	2003-01-17	2007-07-19	2008-06-23		1	0	2007-07-19	2008-06-23	54	65
237	14982	P0686-01-C122-U133Plus-2.CEL	03/24/2004 19:25:00.000	TT2	U133Plus-P686	67.3493	female	white	IgG	2.4	45	1	140	4.8	12.1	23	25	9	0	0	0	65.2333	0	65.2333	Training	0	0	0	1935-11-25	2003-01-22	2003-01-24		2008-06-03		0	0	2008-06-03	2008-06-03	65	65
238	15053	P0689-01-C180-U133Plus-2.CEL	03/24/2004 16:00:00.000	TT2	U133Plus-P689	64.0659	female	white	IgG	4	1.4	0.9	223	4.6	9.5	80	75	0	0	1	1	7.26667	0	64.7	Training	0	1	0	1939-03-31	2003-02-05	2003-02-19	2003-09-25	2008-06-13		1	0	2003-09-25	2008-06-13	7	64
239	15081	P0691-01-C189-U133Plus-2.CEL	03/30/2004 15:41:00.000	TT2	U133Plus-P691	49.5484	female	white	IgA	1.8	1	0.8	103	4.3	12.7	30	25	1	0	0	0	60.5	0	60.5	Training	0	0	0	1956-09-26	2003-02-12	2003-02-24		2008-02-13		0	0	2008-02-13	2008-02-13	60	60
240	15058	P0692-01-C192-U133Plus-2.CEL	02/20/2004 23:24:00.000	TT2	U133Plus-P692	39.9121	female	white	FLC	4.5	18.9	0.8	245	4.1	8.7	20	55	7	0	1	0	64.3667	0	64.3667	Training	1	0	0	1963-05-10	2003-02-06	2003-02-27		2008-06-11		0	0	2008-06-11	2008-06-11	64	64
241	15147	P0695-01-C220-U133Plus-2.CEL	03/16/2004 16:36:00.000	TT2	U133Plus-P695	66.2347	female	white	IgA	8	5.1	3.3	105	3.6	11	80	85	0	0	1	0	64.5	0	64.5	Training	1	0	0	1937-02-12	2003-02-27	2003-03-04		2008-06-20		0	0	2008-06-20	2008-06-20	63	64
242	15072	P0698-01-C234-U133Plus-2.CEL	03/16/2004 15:59:00.000	TT2	U133Plus-P698	70.0728	female	white	IgA	2.7	9.4	0.6	177	4.5	11	54	80	0	0	1	1	6.53333	1	6.53333	Training	1	1	1	1933-04-18	2003-02-11	2003-03-06		2003-09-18	2003-09-18	0	1	2003-09-18	2003-09-18	6	7
243	15026	P0702-01-C171-U133Plus-2.CEL	03/23/2004 16:15:00.000	TT2	U133Plus-P702	48.8675	female	white	IgA	2.3	20.2	1.1	144	4.5	10.7	32.5	17.5	0	0	1	0	27.7667	0	27.7667	Training	0	0	0	1954-05-21	2003-01-30	2003-02-13		2005-05-26		0	0	2005-05-26	2005-05-26	27	28
244	15199	P0705-01-C282-U133Plus-2.CEL	03/23/2004 16:28:00.000	TT2	U133Plus-P705	64.2032	female	white	IgD	4.8	4	0.9	202	4.3	8.8	70	80	1	0	0	1	24.6	0	63.0333	Training	0	0	0	1939-03-28	2003-03-13	2003-04-07	2005-04-14	2008-06-10		1	0	2005-04-14	2008-06-10	24	63
245	15092	P0707-01-C226-U133Plus-2.CEL	03/15/2004 15:39:00.000	TT2	U133Plus-P707	59.7035	female	white	IgA	3.9	5.8	1.1	241	4.3	10.5	12.5	70	41	0	0	1	5.06667	1	5.06667	Training	1	1	1	1943-09-11	2003-02-14	2003-03-27		2003-08-26	2003-08-26	0	1	2003-08-26	2003-08-26	5	6
246	15202	P0712-01-C271-U133Plus-2.CEL	03/24/2004 17:58:00.000	TT2	U133Plus-P712	48.1894	female	other	IgG	4.4	3.2	1.2	166	3.9	10.6	40	45	0	0	1	0	60.7	0	60.7	Training	0	0	0	1955-04-16	2003-03-14	2003-05-07		2008-05-01		0	0	2008-05-01	2008-05-01	60	62
247	15169	P0713-01-C272-U133Plus-2.CEL	03/24/2004 18:48:00.000	TT2	U133Plus-P713	53.3233	male	white	FLC	15.7	1	3.1	211	4.3	10.3	80	75	52	1	1	0	63.9	0	63.9	Training	0	0	0	1950-01-22	2003-03-06	2003-03-26		2008-06-24		0	0	2008-06-24	2008-06-24	63	63
248	15091	P0718-01-C250-U133Plus-2.CEL	03/23/2004 16:40:00.000	TT2	U133Plus-P718	42.7481	female	other	IgG	1.5	1.4	1	111	3.5	9.8	50	20	1	0	0	0	63.2	0	63.2	Training	0	0	0	1960-07-31	2003-02-14	2003-03-19		2008-05-27		0	0	2008-05-27	2008-05-27	62	63
249	15242	P0722-01-C290-U133Plus-2.CEL	02/20/2004 19:15:00.000	TT2	U133Plus-P722	44.0357	male	other	IgG	1.9	1	1.2	166	4.6	14	27.5	27.5	0	1	1	0	60.6333	0	60.6333	Training	1	0	0	1959-07-19	2003-03-26	2003-06-18		2008-06-10		0	0	2008-06-10	2008-06-10	60	63
250	15221	P0723-01-C277-U133Plus-2.CEL	03/24/2004 14:58:00.000	TT2	U133Plus-P723	38.4708	female	white	IgG	1.5	2.7	0.9	244	4.2	12.6	30	15	20	0	0	0	61.4667	0	61.4667	Training	0	0	0	1964-11-17	2003-03-19	2003-03-31		2008-04-17		0	0	2008-04-17	2008-04-17	61	61
251	15168	P0724-01-C258-U133Plus-2.CEL	03/23/2004 13:51:00.000	TT2	U133Plus-P724	65.3699	male	white	IgA	5	31.8	1	235	4.7	14.7	45	80	0	1	1	0	63.3333	0	63.3333	Training	0	0	0	1938-01-20	2003-03-06	2003-03-31		2008-06-12		0	0	2008-06-12	2008-06-12	63	63
252	15177	P0725-01-C278-U133Plus-2.CEL	03/23/2004 13:14:00.000	TT2	U133Plus-P725	66.5422	female	white	NULL	4.7	8.5	0.7	223	4.1	10.3	60	60	0	0	1	0	62.0333	0	62.0333	Training	0	0	0	1936-12-12	2003-03-10	2003-04-23		2008-05-27		0	0	2008-05-27	2008-05-27	61	62
253	15180	P0727-01-C297-U133Plus-2.CEL	03/24/2004 14:45:00.000	TT2	U133Plus-P727	71.7035	female	white	FLC	16.5	12.5	2.7	288	4.4	10.9	75	60	31	0	0	1	48.1667	1	48.1667	Training	0	0	0	1931-10-13	2003-03-10	2003-04-16		2007-03-31	2007-03-31	0	1	2007-03-31	2007-03-31	47	48
254	15244	P0730-01-Fake1-U133Plus-2.CEL	03/24/2004 18:35:00.000	TT2	U133Plus-P730	60.5491	female	other	IgG	2.5	15.7	0.7	135	3.7	10.7	20	5		0	0	0	57.6333	0	57.6333	Training	0	0	0	1942-12-06	2003-03-27	2003-04-25		2008-01-18		0	0	2008-01-18	2008-01-18	57	58
255	15414	P0731-02-C350-U133Plus-2.CEL	03/25/2004 15:41:00.000	TT2	U133Plus-P731-2	39.8435	female	white	IgA	1.3	9.5	0.6	144	4	10.8	30	30	17	0	1	0	61.4	0	61.4	Training	0	0	0	1963-08-17	2003-04-28	2003-05-12		2008-05-27		0	0	2008-05-27	2008-05-27	60	61
257	15357	P0734-01-C311-U133Plus-2.CEL	03/15/2004 15:14:00.000	TT2	U133Plus-P734	65.5402	female	white	IgA	3.2	8.2	0.9	155	4	12.5	35	40	1	0	1	1	51.4333	0	62.2	Training	1	0	0	1937-12-07	2003-04-17	2003-04-18	2007-07-09	2008-05-27		1	0	2007-07-09	2008-05-27	51	61
258	15339	P0735-01-C326-U133Plus-2.CEL	03/24/2004 17:02:00.000	TT2	U133Plus-P735	67.4537	male	white	Nonsecretory	2.4	1.8	1.5	195	4.7	14.6	7.5	5	24	1	1	0	61.1667	0	61.1667	Training	0	0	0	1936-02-18	2003-04-08	2003-05-27		2008-06-04		0	0	2008-06-04	2008-06-04	61	62
259	15378	P0737-01-C330-U133Plus-2.CEL	01/23/2004 14:01:00.000	TT2	U133Plus-P737	62.9595	female	white	FLC	2.5	24.4	0.4	156	3.8	12	40	45	15	0	1	0	61.8667	0	61.8667	Training	0	0	0	1940-07-29	2003-04-24	2003-05-13		2008-06-11		0	0	2008-06-11	2008-06-11	61	62
260	15407	P0739-01-C341-U133Plus-2.CEL	02/21/2004 00:27:00.000	TT2	U133Plus-P739	59.4427	female	white	IgG	1.5		0.9	210	4.2	12.2	17.5	5	14	0	1	0	59.2	0	59.2	Training	1	0	0	1944-01-24	2003-04-25	2003-05-07		2008-03-17		0	0	2008-03-17	2008-03-17	58	59
261	15359	P0740-01-C343-U133Plus-2.CEL	03/23/2004 17:05:00.000	TT2	U133Plus-P740	61.8723	female	white	IgA	7.3	4.8	0.7	234	4.2	7.4	60	35	0	0	1	1	1.66667	1	60.3333	Training	0	1	0	1941-08-23	2003-04-14	2003-05-07	2003-06-26	2008-04-20	2008-04-20	1	1	2003-06-26	2008-04-20	1	60
262	15340	P0741-01-C323-U133Plus-2.CEL	03/23/2004 17:18:00.000	TT2	U133Plus-P741	57.7323	male	white	IgG	2.6	4.6	0.9	150	4.2	12.8	45	20	1	1	1	0	56.5333	0	56.5333	Training	0	0	0	1946-09-25	2003-04-08	2003-04-23		2007-12-14		0	0	2007-12-14	2007-12-14	56	56
263	15487	P0746-01-C401-U133Plus-2.CEL	03/25/2004 17:19:00.000	TT2	U133Plus-P746	45.4001	male	white	IgA	4.6	108	1.3	347	4.3	11.1	80	80	5	1	0	1	11.8667	1	11.8667	Training	1	1	1	1958-02-25	2003-05-20	2003-06-06		2004-05-27	2004-05-27	0	1	2004-05-27	2004-05-27	11	12
265	15484	P0749-01-C394-U133Plus-2.CEL	03/26/2004 14:53:00.000	TT2	U133Plus-P749	60.4695	male	white	NULL	3.7	1	1.6	172	4.7	9.6	80	70	0	1	0	0	60.8667	0	60.8667	Training	0	0	0	1943-02-13	2003-05-20	2003-06-04		2008-06-03		0	0	2008-06-03	2008-06-03	60	61
266	15245	P0750-01-C372-U133Plus-2.CEL	03/25/2004 14:27:00.000	TT2	U133Plus-P750	43.3109	female	white	FLC	2.3	1	0.8	170	4.3	10.9	5	7.5	21	0	1	0	55.3	0	55.3	Training	0	0	0	1960-03-10	2003-03-27	2003-05-20		2007-12-04		0	0	2007-12-04	2007-12-04	55	57
268	15562	P0755-01-C436-U133Plus-2.CEL	03/26/2004 15:05:00.000	TT2	U133Plus-P755	58.6795	male	white	IgA	6	19.4	1.3	128	3.6	10	54	80	0	1	1	0	58.6	0	58.6	Training	0	0	0	1945-01-01	2003-06-06	2003-07-10		2008-05-02		0	0	2008-05-02	2008-05-02	58	59
269	15610	P0758-01-C467-U133Plus-2.CEL	03/30/2004 15:16:00.000	TT2	U133Plus-P758	49.3837	male	white	IgG	2	1	1.1	123	4.3	11.7	26	40	0	1	1	1	30.8667	0	58.8333	Training	0	0	0	1954-05-26	2003-06-18	2003-08-25	2006-03-08	2008-06-24		1	0	2006-03-08	2008-06-24	31	60
270	15356	P0760-01-C342-U133Plus-2.CEL	03/25/2004 16:42:00.000	TT2	U133Plus-P760	53.7625	male	white	IgG	3.4	1	0.9	117	3.5	13	25	17.5	0	1	0	1	45.4333	0	61.2667	Training	0	0	0	1949-10-16	2003-04-11	2003-05-30	2007-02-21	2008-06-10		1	0	2007-02-21	2008-06-10	45	62
271	15408	P0762-01-C375-U133Plus-2.CEL	03/17/2004 14:30:00.000	TT2	U133Plus-P762	66.6822	male	white	IgG	3.9	10.8	1.1	313	3.2	9	70	80	0	1	0	0	61.5333	0	61.5333	Training	1	0	0	1936-11-20	2003-04-25	2003-05-22		2008-06-10		0	0	2008-06-10	2008-06-10	61	62
272	15717	P0766-01-C517-U133Plus-2.CEL	03/25/2004 14:39:00.000	TT2	U133Plus-P766	56.6781	female	white	FLC	2.7	9.5	0.7	179	4.3	12	5	5	9	0	1	1	7.33333	1	7.33333	Training	0	1	1	1947-01-25	2003-07-15	2003-08-04		2004-03-11	2004-03-11	0	1	2004-03-11	2004-03-11	7	8
273	15432	P0767-01-C348-U133Plus-2.CEL	03/26/2004 15:18:00.000	TT2	U133Plus-P767	58.3253	female	white	FLC	2.4	2.8	0.7	176	4.6	10.9	80	60	7	0	1	1	32.9667	0	62.0667	Training	0	0	0	1945-03-12	2003-05-02	2003-05-12	2006-01-25	2008-06-16		1	0	2006-01-25	2008-06-16	32	61
274	15434	P0768-01-C363-U133Plus-2.CEL	03/26/2004 14:28:00.000	TT2	U133Plus-P768	59.0446	female	white	FLC	8.5	1	1.8	302	4.9	11.7	70	80	0	0	1	1	7.13333	1	7.13333	Training	0	1	1	1944-06-30	2003-05-05	2003-05-19		2003-12-19	2003-12-19	0	1	2003-12-19	2003-12-19	7	7
275	15745	P0769-01-C499-U133Plus-2.CEL	02/03/2004 13:05:00.000	TT2	U133Plus-P769	65.0487	male	white	IgA	2.9	12.1	1	195	4.1	13.5	33	30	33	1	1	1	23.1333	1	47.4333	Training	0	1	0	1938-09-08	2003-07-22	2003-07-23	2005-06-16	2007-06-15	2007-06-15	1	1	2005-06-16	2007-06-15	23	47
276	15714	P0770-01-C497-U133Plus-2.CEL	03/25/2004 16:30:00.000	TT2	U133Plus-P770	73.4248	female	white	IgG	5.2	1	1	194	3	10.5	73	80	3	0	0	1	13.5	1	14.7333	Training	0	1	1	1930-05-03	2003-07-14	2003-07-24	2004-09-01	2004-10-08	2004-10-08	1	1	2004-09-01	2004-10-08	14	15
277	15768	P0772-01-C519-U133Plus-2.CEL	03/23/2004 13:26:00.000	TT2	U133Plus-P772	51.9478	female	white	FLC	1.6	1	0.8	173	4.6	11.8	57	70		0	1	0	55.9333	0	55.9333	Training	0	0	0	1951-10-11	2003-07-28	2003-08-01		2008-03-05		0	0	2008-03-05	2008-03-05	55	56
278	15723	P0774-01-C511-U133Plus-2.CEL	01/23/2004 13:48:00.000	TT2	U133Plus-P774	42.0151	female	white	IgG	1.2	1	0.5	201	4	9.9	17	30	5	0	0	1	25.0667	0	57.5333	Training	0	0	0	1961-09-09	2003-07-16	2003-08-04	2005-08-25	2008-04-25		1	0	2005-08-25	2008-04-25	24	57
279	15691	P0775-01-C500-U133Plus-2.CEL	03/25/2004 16:18:00.000	TT2	U133Plus-P775	66.7618	female	white	IgG	3.1	12.9	0.8	206	3.7	14.3	11	15	7	0	1	0	58.8333	0	58.8333	Training	0	0	0	1937-01-07	2003-07-09	2003-08-07		2008-06-06		0	0	2008-06-06	2008-06-06	58	59
280	15468	P0777-01-C414-U133Plus-2.CEL	03/25/2004 16:54:00.000	TT2	U133Plus-P777	71.0721	female	white	IgA	6.5	1	0.6	139	4.2	11.1	80	65	1	0	0	0	61.1667	0	61.1667	Training	0	0	0	1932-07-30	2003-05-23	2003-06-16		2008-06-24		0	0	2008-06-24	2008-06-24	60	61
281	15520	P0778-01-C427-U133Plus-2.CEL	03/25/2004 14:14:00.000	TT2	U133Plus-P778	30.4955	male	other	IgG	1.5	1	1	116	4.5	12.7	55	45	1	1	1	0	60.1667	0	60.1667	Training	0	0	0	1973-02-02	2003-05-29	2003-07-03		2008-06-11		0	0	2008-06-11	2008-06-11	59	61
282	15681	P0779-01-C501-U133Plus-2.CEL	01/27/2004 12:34:00.000	TT2	U133Plus-P779	55.9643	female	white	IgG	2.1	1	0.6	172	4.4	12.4	35	30	14	0	0	1	45.4333	0	59.9	Training	0	0	0	1947-09-29	2003-07-08	2003-07-23	2007-04-16	2008-06-23		1	0	2007-04-16	2008-06-23	45	59
283	15614	P0782-01-C451-U133Plus-2.CEL	03/23/2004 17:43:00.000	TT2	U133Plus-P782	73.0981	female	white	IgG	2.2	1	0.8	147	3.7	10.4	45	30	3	0	1	1	46.6333	0	60.0333	Training	0	0	0	1936-08-07	2003-06-20	2003-07-01	2007-04-30	2008-06-05		1	0	2007-04-30	2008-06-05	45	60
284	15611	P0783-01-C461-U133Plus-2.CEL	03/25/2004 17:06:00.000	TT2	U133Plus-P783	43.7968	male	other	IgG	1.5	1	1	142	4.1	13.2	13	30	2	1	1	0	57.9	0	57.9	Training	0	0	0	1959-11-05	2003-06-18	2003-07-10		2008-04-11		0	0	2008-04-11	2008-04-11	57	58
285	15573	P0789-01-C458-U133Plus-2.CEL	01/23/2004 12:45:00.000	TT2	U133Plus-P789	54.6328	female	other	IgA	4.4	1	0.7	116	3.6	10.4	47	50	25	0	1	1	16.3333	1	25.3333	Training	1	1	0	1949-01-11	2003-06-10	2003-07-07	2004-11-08	2005-08-05	2005-08-05	1	1	2004-11-08	2005-08-05	16	26
286	15593	P0797-01-C469-U133Plus-2.CEL	03/25/2004 16:05:00.000	TT2	U133Plus-P797	49.3864	female	other	IgA	3.8	41.1	0.7	390	3.9	8.6	95	80	0	0	0	1	18.4667	1	38.3667	Training	0	1	0	1954-04-02	2003-06-12	2003-07-03	2005-01-07	2006-08-27	2006-08-27	1	1	2005-01-07	2006-08-27	18	38
287	15465	P0798-01-C389-U133Plus-2.CEL	01/23/2004 13:07:00.000	TT2	U133Plus-P798	55.7666	female	white	NULL	6.6	2.7	1.5	219	4.7	9.8	90	90	1	0	1	0	60.7333	0	60.7333	Training	0	0	0	1947-11-13	2003-05-15	2003-06-25		2008-06-20		0	0	2008-06-20	2008-06-20	60	61
288	15771	P0804-01-C545-U133Plus-2.CEL	03/17/2004 15:06:00.000	TT2	U133Plus-P804	68.4585	male	white	IgG	4.1	3.2	1	209	3.6	11.7	67	60		1	0	0	58.3333	0	58.3333	Training	1	0	0	1935-05-12	2003-07-30	2003-08-19		2008-06-03		0	0	2008-06-03	2008-06-03	58	59
289	15739	P0806-01-C527-U133Plus-2.CEL	03/25/2004 15:04:00.000	TT2	U133Plus-P806	40.6012	male	white	IgA	20.4	5.7	7.2	248	4.5	11.8	35	40	0	1	0	1	1.33333	1	44.3	Training	0	1	0	1963-02-08	2003-07-22	2003-08-06	2003-09-15	2007-03-27	2007-03-27	1	1	2003-09-15	2007-03-27	1	44
290	15820	P0807-01-C562-U133Plus-2.CEL	02/04/2004 10:10:00.000	TT2	U133Plus-P807	45.1668	male	white	IgG	16.3	22.3	10.3	288	2.7	8.6	70	60	12	1	0	1	16.8	1	37.1333	Training	1	1	0	1948-08-04	2003-08-12	2003-08-20	2005-01-05	2006-09-07	2006-09-07	1	1	2005-01-05	2006-09-07	17	37
291	15893	P0821-01-C606-U133Plus-2.CEL	01/27/2004 13:53:00.000	TT2	U133Plus-P821	48.9526	male	white	IgG	2.1	6.7	1	123	4.9	12.8	45	45	3	1	0	0	56.6333	0	56.6333	Training	0	0	0	1954-11-23	2003-09-09	2003-09-18		2008-05-13		0	0	2008-05-13	2008-05-13	56	56
292	15843	P0822-01-C598-U133Plus-2.CEL	03/25/2004 15:28:00.000	TT2	U133Plus-P822	66.4516	male	white	IgG	3.6	2.1	1.2	124	3.6	9.9	6	20	1	1	1	0	58.0333	0	58.0333	Training	0	0	0	1937-06-10	2003-08-21	2003-09-17		2008-06-23		0	0	2008-06-23	2008-06-23	57	58
293	15844	P0830-01-C596-U133Plus-2.CEL	01/27/2004 11:11:00.000	TT2	U133Plus-P830	56.2828	male	white	IgG	3.3	4.8	1.1	174	4.5	11.2	30	50	0	1	0	1	36.0667	0	57.3333	Training	0	0	0	1947-07-27	2003-08-22	2003-09-12	2006-08-29	2008-05-28		1	0	2006-08-29	2008-05-28	35	57
294	15878	P0834-01-C602-U133Plus-2.CEL	03/25/2004 15:16:00.000	TT2	U133Plus-P834	61.8202	male	white	IgA	3.8	10.7	1	146	4.1	13.2	45	60		1	0	0	57.4	0	57.4	Training	0	0	0	1942-02-11	2003-09-02	2003-10-07		2008-06-24		0	0	2008-06-24	2008-06-24	56	57
295	15930	P0842-01-C637-U133Plus-2.CEL	03/25/2004 15:53:00.000	TT2	U133Plus-P842	65.768	female	white	IgA	2.9	1.2	1	120	3.7	11.4	40	40	6	0	0	1	23	1	23	Training	1	1	1	1938-03-01	2003-09-18	2003-10-02		2005-08-22	2005-08-22	0	1	2005-08-22	2005-08-22	22	23
296	15955	P0845-01-C649-U133Plus-2.CEL	01/27/2004 12:47:00.000	TT2	U133Plus-P845	61.7872	male	white	IgA	3.4	4.5	0.9	168	4.3	9.8	62	30	4	1	1	0	57.2667	0	57.2667	Training	1	0	0	1942-02-23	2003-09-23	2003-10-07		2008-06-20		0	0	2008-06-20	2008-06-20	56	57
297	15919	P0846-01-C633-U133Plus-2.CEL	02/03/2004 10:47:00.000	TT2	U133Plus-P846	49.7351	male	white	IgG	3	9.9	1.3	146	3.4	14	11	7.5	45	1	1	1	29.2	0	57.6333	Training	0	0	0	1954-02-23	2003-09-15	2003-09-30	2006-02-22	2008-06-24		1	0	2006-02-22	2008-06-24	29	57
298	15916	P0854-01-C619-U133Plus-2.CEL	02/03/2004 12:15:00.000	TT2	U133Plus-P854	67.1819	male	white	IgG	3.5	1.8	1.1	202	3.7	13.6			27	1	0	1	26	0	56	Training	0	0	0	1936-09-19	2003-09-15	2003-09-19	2005-11-07	2008-04-25		1	0	2005-11-07	2008-04-25	26	55
299	15958	P0864-01-C645-U133Plus-2.CEL	03/25/2004 14:51:00.000	TT2	U133Plus-P864	68.8346	male	white	IgG	5.7	2.5	1.2	170	4.5	10.6	60	50	0	1	0	1	10	0	57.2333	Training	1	1	0	1935-02-13	2003-09-24	2003-10-07	2004-08-02	2008-06-19		1	0	2004-08-02	2008-06-19	10	57
300	16008	P0867-01-C683-U133Plus-2.CEL		TT2	U133Plus-P867	41.5347	male	white	IgG	5	4.5	1.3	95	3	11.3	75	12.5	3	1	1	1	39.6	0	56.5333		1	0	0	1962-05-21	2003-10-03	2003-10-22	2007-01-22	2008-06-13		1	0	2007-01-22	2008-06-13	39	56
301	15985	P0868-01-C670-U133Plus-2.CEL		TT2	U133Plus-P868	49.6747	female	white	IgA	2.1	68.4	0.7	85	3.1	8.5	47	60	32	0	1	1	18.9	1	53.9333		0	1	0	1954-04-01	2003-10-01	2003-10-15	2005-05-04	2008-03-20	2008-03-20	1	1	2005-05-04	2008-03-20	19	53
302	16097	P0871-01-C714-U133Plus-2.CEL	03/23/2004 15:01:00.000	TT2	U133Plus-P871	43.8243	female	white	IgG	1.8	1.1	0.7	124	4	12.3	10	10	0	0	1	0	50.9333	0	50.9333	Training	0	0	0	1960-02-20	2003-10-23	2003-11-04		2008-01-10		0	0	2008-01-10	2008-01-10	50	51
303	15973	P0875-01-C654-U133Plus-2.CEL		TT2	U133Plus-P875	49.4111	female	white	IgA	2.1	2	0.9	204	4.2	10.2	31	30	0	0	1	0	51.7	0	51.7		0	0	0	1954-07-01	2003-09-29	2003-10-10		2008-01-08		0	0	2008-01-08	2008-01-08	51	52
304	16041	P0877-01-C707-U133Plus-2.CEL		TT2	U133Plus-P877	57.4358	female	white	IgA	4.3	1	0.8	114	4.4	9.8	80	80	3	0	0	1	28.5667	1	46.8333		0	0	0	1946-07-21	2003-10-10	2003-10-31	2006-03-06	2007-09-05	2007-09-05	1	1	2006-03-06	2007-09-05	29	47
305	15991	P0889-01-C671-U133Plus-2.CEL	03/30/2004 17:07:00.000	TT2	U133Plus-P889	57.4084	male	white	FLC	3	1	1	180	4.1	13.4	86	90		1	0	1	37.6	0	56	Training	0	0	0	1946-08-10	2003-10-01	2003-11-10	2006-12-12	2008-06-16		1	0	2006-12-12	2008-06-16	37	56
306	10013	P0890-01-C657-U133Plus-2.CEL	02/04/2004 11:34:00.000	TT2	U133Plus-P890	51.558	female	white	IgG	2	3.1	0.9	200	4.4	13.4	23	20		0	1	0	56.2333	0	56.2333	Training	0	0	0	1952-05-30	2000-06-29	2003-10-30		2008-06-12		0	0	2008-06-12	2008-06-12	56	96
307	15964	P0892-01-C647-U133Plus-2.CEL		TT2	U133Plus-P892	41.7296	male	white	IgA	2.9	2.5	0.8	95	3.4	9.1	33	90	0	1	1	1	18.6	0	57.1667		0	1	0	1962-02-25	2003-09-26	2003-10-08	2005-04-18	2008-06-18		1	0	2005-04-18	2008-06-18	18	57
308	16116	P0894-01-C713-U133Plus-2.CEL		TT2	U133Plus-P894	46.9375	female	white	FLC	47.7	1	7.9	402	4.2	10	80	80	1	0	0	1	0.266667	1	51.6667		1	1	0	1957-01-13	2003-10-28	2003-11-05	2003-11-13	2008-02-02	2008-02-02	1	1	2003-11-13	2008-02-02	0	52
309	16085	P0896-01-C711-U133Plus-2.CEL	03/23/2004 12:35:00.000	TT2	U133Plus-P896	58.0947	male	white	IgG	1.7	16.9	0.9	235	4.5	9.2	50	7.5	19	1	1	0	54.3333	0	54.3333	Training	1	0	0	1945-11-23	2003-10-21	2003-10-31		2008-04-17		0	0	2008-04-17	2008-04-17	54	54
310	16323	P0907-01-C859-U133Plus-2.CEL	03/05/2004 14:27:00.000	TT2	U133Plus-P907	60.5957	male	white	IgG	3.4	4.9	1	166	3.4	11.9			29	1	1	1	10.3333	1	16.9667	Training	0	1	1	1943-08-03	2003-12-30	2004-01-07	2004-11-12	2005-05-30	2005-05-30	1	1	2004-11-12	2005-05-30	10	17
311	15864	P0908-01-C702-U133Plus-2.CEL	01/23/2004 16:29:00.000	TT2	U133Plus-P908	50.0426	male	white	IgG	1.6	1.2	1.1	144	4.8	13.9	30	25	7	1	1	0	54.7667	0	54.7667	Training	0	0	0	1954-01-07	2003-08-26	2003-12-04		2008-06-03		0	0	2008-06-03	2008-06-03	54	58
312	16094	P0911-01-C725-U133Plus-2.CEL	01/27/2004 13:06:00.000	TT2	U133Plus-P911	47.1819	female	white	IgG	1.8	1.5	0.7	134	4.2	12.8	44	50	0	0	1	0	53.3667	0	53.3667	Training	0	0	0	1956-12-20	2003-10-22	2004-01-09		2008-05-28		0	0	2008-05-28	2008-05-28	52	55
313	15769	P0912-01-C555-U133Plus-2.CEL	01/23/2004 16:14:00.000	TT2	U133Plus-P912	56.0165	male	white	IgG	9.5	1.4	1.1	122	4	10.4	63	30	0	1	1	0	57.8	0	57.8	Training	0	0	0	1947-10-03	2003-07-29	2003-08-14		2008-05-13		0	0	2008-05-13	2008-05-13	57	58
314	16099	P0913-01-C741-U133Plus-2.CEL	01/23/2004 11:57:00.000	TT2	U133Plus-P913	61.5209	female	white	FLC	2.5	6.7	0.8	167	4.5	15.5	39	40	21	0	0	0	55.9667	0	55.9667	Training	0	0	0	1942-07-08	2003-10-23	2003-11-14		2008-06-19		0	0	2008-06-19	2008-06-19	55	56
315	15797	P0915-01-C547-U133Plus-2.CEL	03/26/2004 14:16:00.000	TT2	U133Plus-P915	51.4015	female	white	IgG	2.1	2.4	0.8	200	3.8	11.5	43	40	1	0	1	0	59	0	59	Training	0	0	0	1952-05-11	2003-08-05	2003-08-15		2008-06-19		0	0	2008-06-19	2008-06-19	58	58
316	16157	P0916-01-C823-U133Plus-2.CEL	03/31/2004 21:08:00.000	TT2	U133Plus-P916	60.5353	female	white	IgG	2.9	5.1	0.8	143	3.8	11.4	30	40	3	0	0	0	54.1333	0	54.1333	Training	0	0	0	1943-08-06	2003-11-10	2003-12-19		2008-05-30		0	0	2008-05-30	2008-05-30	53	54
317	16263	P0917-01-C821-U133Plus-2.CEL	03/30/2004 17:44:00.000	TT2	U133Plus-P917	63.9616	male	white	IgG	6.4	1	2.2	231	3.3	11	67	70	53	1	0	0	54.7667	0	54.7667	Training	0	0	0	1940-03-05	2003-12-11	2003-12-18		2008-06-17		0	0	2008-06-17	2008-06-17	54	54
318	16224	P0918-01-C789-U133Plus-2.CEL	03/30/2004 17:57:00.000	TT2	U133Plus-P918	63.0336	male	white	IgG	4.8	4.9	1.9	149	3.8	9.9	35	30	17	1	0	1	10.2667	1	10.2667	Training	1	1	1	1941-02-06	2003-12-03	2003-12-18		2004-10-21	2004-10-21	0	1	2004-10-21	2004-10-21	10	10
319	5084	P0919-02-C490-U133Plus-2.CEL	01/23/2004 10:48:00.000	TT2	U133Plus-P919-2	54.2759	male	white	IgG	3.8	3.7	1	117	3.4	9	90	80	0	1	1	0	56.2667	0	56.2667	Training	1	0	0	1949-06-06	1985-10-25	2003-07-23		2008-03-06		0	0	2008-03-06	2008-03-06	56	269
320	16052	P0920-01-C693-U133Plus-2.CEL	01/27/2004 11:52:00.000	TT2	U133Plus-P920	56.9911	male	white	FLC	1.8	2.7	0.9	199	4.2	13.2	55	35	3	1	1	0	56.4333	0	56.4333	Training	0	0	0	1947-01-04	2003-10-15	2003-11-05		2008-06-24		0	0	2008-06-24	2008-06-24	55	56
321	16163	P0921-01-C769-U133Plus-2.CEL	01/28/2004 13:45:00.000	TT2	U133Plus-P921	48.5353	female	white	FLC	1.6		0.7	170	4.3	13.1	5	30	0	0	1	0	54.8667	0	54.8667	Training	0	0	0	1955-07-01	2003-11-12	2003-11-25		2008-05-28		0	0	2008-05-28	2008-05-28	54	54
322	16208	P0923-01-C788-U133Plus-2.CEL	01/28/2004 12:52:00.000	TT2	U133Plus-P923	53.5154	male	other	IgG	1.5	11	1.1	116	4.1	13	18	15	10	1	0	0	53.3667	0	53.3667	Training	1	0	0	1950-09-03	2003-11-26	2004-01-16		2008-06-04		0	0	2008-06-04	2008-06-04	53	55
323	16390	P0924-01-C899-U133Plus-2.CEL	01/28/2004 12:08:00.000	TT2	U133Plus-P924	65.3123	male	white	IgG	1.8	2.8	1.1	138	4.4	12.1	70		0	1	0	0	52.2667	0	52.2667	Training	1	0	0	1938-12-04	2004-01-15	2004-01-22		2008-05-08		0	0	2008-05-08	2008-05-08	52	52
324	16245	P0927-03-C787-U133Plus-2.CEL	03/30/2004 18:09:00.000	TT2	U133Plus-P927-3	56.9032	male	white	IgG	7.6	3.1	1.3	280	4.4	9.1	60	40	24	1	0	1	19.3	1	24.4	Training	1	1	0	1947-03-20	2003-12-08	2003-12-18	2005-07-19	2005-12-19	2005-12-19	1	1	2005-07-19	2005-12-19	19	24
325	15810	P0930-01-C574-U133Plus-2.CEL	02/04/2004 09:37:00.000	TT2	U133Plus-P930	60.3075	male	white	FLC	1.6	1.1	1.1	214	4.6	14.9	10	30	3	1	0	0	51.4667	0	51.4667	Training	0	0	0	1943-07-07	2003-08-07	2003-08-28		2007-11-19		0	0	2007-11-19	2007-11-19	51	51
326	15959	P0931-01-C648-U133Plus-2.CEL	04/02/2004 20:05:00.000	TT2	U133Plus-P931	68.873	female	white	FLC	9.4	2.3	1.7	275	4.3	9	76	80	0	0	1	0	55.1333	0	55.1333	Training	1	0	0	1935-01-31	2003-10-03	2003-10-08		2008-04-18		0	0	2008-04-18	2008-04-18	54	54
327	16185	P0934-01-C764-U133Plus-2.CEL	02/09/2004 09:59:00.000	TT2	U133Plus-P934	45.0981	male	white	IgG	9	13.7	2.1	224	3.5	9.8	44	80	0	1	0	1	5.9	1	9.86667	Training	0	1	1	1958-12-04	2003-11-19	2003-11-25	2004-05-20	2004-09-16	2004-09-16	1	1	2004-05-20	2004-09-16	6	10
328	16309	P0935-02-C847-U133Plus-2.CEL	03/31/2004 19:41:00.000	TT2	U133Plus-P935-2	43.0583	female	white	FLC	15.1	6	4.4	379	4.7	10.6	68	80	13	0	1	1	4.2	0	54.1	Training	0	1	0	1961-01-23	2003-12-29	2004-01-02	2004-05-07	2008-06-12		1	0	2004-05-07	2008-06-12	4	54
329	16279	P0937-02-C826-U133Plus-2.CEL	03/02/2004 16:41:00.000	TT2	U133Plus-P937-2	69.3672	female	white	IgA	8.2	10.5	0.8	137	4.3	8.3	80	80	0	0	0	0	54.1667	0	54.1667	Training	0	0	0	1934-10-25	2003-12-16	2003-12-29		2008-06-10		0	0	2008-06-10	2008-06-10	54	54
330	16280	P0939-02-C830-U133Plus-2.CEL	04/06/2004 16:17:00.000	TT2	U133Plus-P939-2	73.5182	female	white	IgG	9.5	4.8	3.1	296	3.9	9.6	45	30	12	0	0	1	40.8	0	53.6667	Training	1	0	0	1930-09-05	2003-12-16	2003-12-30	2007-05-07	2008-05-27		1	0	2007-05-07	2008-05-27	41	53
332	16155	P0954-01-C768-U133Plus-2.CEL	03/03/2004 09:45:00.000	TT2	U133Plus-P954	40.0357	male	white	IgA	5.3	1	1.3	231	4.5	9.3	68	80	0	1	0	1	32.4333	0	54.6333	Training	0	0	0	1964-01-04	2003-11-10	2003-12-08	2006-08-07	2008-06-03		1	0	2006-08-07	2008-06-03	32	55
333	16387	P0955-01-C950-U133Plus-2.CEL	03/03/2004 08:42:00.000	TT2	U133Plus-P955	35.838	female	white	FLC	4.7	1	1.1	187	4.6	11.7	20	70	24	0	1	0	52.1	0	52.1	Training	0	0	0	1968-05-07	2004-01-14	2004-02-02		2008-05-14		0	0	2008-05-14	2008-05-14	51	52
334	16072	P0957-01-C716-U133Plus-2.CEL	03/17/2004 15:28:00.000	TT2	U133Plus-P957	41.8943	male	white	IgA	2.4	7.4	1	165	3.7	12.8	7.5	15	17	1	1	1	25.7667	1	27.3	Training	1	0	0	1962-01-22	2003-10-17	2003-11-03	2005-12-15	2006-01-30	2006-01-30	1	1	2005-12-15	2006-01-30	25	27
335	16385	P0958-00-C922-U133Plus-2.CEL	04/02/2004 21:32:00.000	TT2	U133Plus-P958-0	35.2313	male	white	IgA	2.1	4.3	1	378	4.4	13.8	80	95	5	1	0	1	12.8	1	27.1667	Training	1	1	0	1968-12-09	2004-01-14	2004-01-28	2005-02-15	2006-04-22	2006-04-22	1	1	2005-02-15	2006-04-22	13	27
336	16378	P0959-00-C915-U133Plus-2.CEL	04/02/2004 21:07:00.000	TT2	U133Plus-P959-0	49.8641	female	white	IgG	3.1	7.5	0.6	181	4.8	12.3	38	70	0	0	1	0	52.6	0	52.6	Training	0	0	0	1954-05-05	2004-01-13	2004-01-26		2008-05-22		0	0	2008-05-22	2008-05-22	52	52
337	16416	P0960-01-C933-U133Plus-2.CEL	03/05/2004 13:16:00.000	TT2	U133Plus-P960	64.582	male	white	IgA	1.5	1.4	0.9	181	4.7	15.1	20	30	24	1	0	0	52.5333	0	52.5333	Training	0	0	0	1939-09-03	2004-01-22	2004-01-29		2008-05-23		0	0	2008-05-23	2008-05-23	52	52
338	16322	P0961-01-C891-U133Plus-2.CEL	03/05/2004 13:29:00.000	TT2	U133Plus-P961	65.8257	male	white	IgA	4	1	1.2	133	4.9	11.1	51	50	0	1	1	0	52.7333	0	52.7333	Training	0	0	0	1938-06-21	2003-12-30	2004-02-12		2008-06-12		0	0	2008-06-12	2008-06-12	52	54
339	16349	P0965-01-C860-U133Plus-2.CEL	03/05/2004 12:52:00.000	TT2	U133Plus-P965	51.105	male	white	IgA	2.3	29	1.1	138	4.2	12.1	16	30	2	1	0	0	53.4333	0	53.4333	Training	0	0	0	1953-01-21	2004-01-06	2004-01-09		2008-05-30		0	0	2008-05-30	2008-05-30	52	52
340	16058	P0966-01-C708-U133Plus-2.CEL	03/30/2004 17:32:00.000	TT2	U133Plus-P966	42.1167	female	white	IgG	1.7	4	0.8	147	3.8	11.1	7.5	80	14	0	0	0	50.8	0	50.8	Training	0	0	0	1961-11-12	2003-10-16	2003-11-13		2008-01-15		0	0	2008-01-15	2008-01-15	50	51
341	16060	P0967-01-C704-U133Plus-2.CEL	03/30/2004 17:20:00.000	TT2	U133Plus-P967	66.4049	female	white	IgG	4	23	0.5	307	2.9	11.7	25	30	16	0	0	1	2.26667	1	2.26667	Training	1	1	1	1937-08-09	2003-10-16	2003-10-30		2004-01-06	2004-01-06	0	1	2004-01-06	2004-01-06	3	3
342	15639	P0969-01-C464-U133Plus-2.CEL	03/30/2004 15:28:00.000	TT2	U133Plus-P969	52.0686	male	other	IgA	3.2	32.1	1.4	135	4.2	12.4	20	50	14	1	0	0	57.8667	0	57.8667	Training	0	0	0	1951-10-14	2003-06-26	2003-09-17		2008-06-18		0	0	2008-06-18	2008-06-18	57	60
343	16359	P0971-01-C885-U133Plus-2.CEL	03/30/2004 18:34:00.000	TT2	U133Plus-P971	48.1839	male	white	IgG	3.1	1.6	1.2	110	4.3	13	24	30	3	1	1	0	53.1	0	53.1	Training	0	0	0	1955-12-28	2004-01-08	2004-01-16		2008-05-27		0	0	2008-05-27	2008-05-27	52	52
344	16351	P0972-01-C889-U133Plus-2.CEL	03/30/2004 18:46:00.000	TT2	U133Plus-P972	53.628	male	white	IgA	25.6	1	7.7	94	3.7	8.3	76	80	11	1	1	1	34.7	1	50	Training	0	0	0	1950-07-24	2004-01-06	2004-01-16	2006-11-22	2008-02-24	2008-02-24	1	1	2006-11-22	2008-02-24	34	49
345	16407	P0973-01-C948-U133Plus-2.CEL	03/30/2004 18:59:00.000	TT2	U133Plus-P973	57.5841	female	white	IgG	2.4	1	0.8	229	4.6	12.1	60.5	40	16	0	1	0	52.7667	0	52.7667	Training	0	0	0	1946-09-01	2004-01-21	2004-02-04		2008-06-05		0	0	2008-06-05	2008-06-05	52	53
346	16283	P0975-01-C842-U133Plus-2.CEL	03/31/2004 19:53:00.000	TT2	U133Plus-P975	72.5161	male	white	IgA	13	1.1	1.2	151	2.9	9.7	73	80	1	1	0	1	32.6	1	41.2333	Training	1	0	0	1931-09-14	2003-12-17	2004-01-08	2006-09-12	2007-05-29	2007-05-29	1	1	2006-09-12	2007-05-29	32	41
347	16308	P0976-01-C848-U133Plus-2.CEL	03/31/2004 19:28:00.000	TT2	U133Plus-P976	73.7378	male	white	IgG	6.5	26.5	1.2	122	2.8	10.1	89	80	0	1	1	1	31.8333	0	54.3667	Training	0	0	0	1930-06-17	2003-12-26	2003-12-30	2006-08-11	2008-06-17		1	0	2006-08-11	2008-06-17	32	54
348	16306	P0977-01-C877-U133Plus-2.CEL	03/31/2004 20:18:00.000	TT2	U133Plus-P977	57.348	male	white	IgG	3.4	7.1	0.7	225	4	11	18	60	44	1	0	1	9.83333	1	17.9	Training	0	1	1	1946-11-04	2003-12-26	2004-01-13	2004-11-03	2005-07-03	2005-07-03	1	1	2004-11-03	2005-07-03	10	19
349	16360	P0978-01-C884-U133Plus-2.CEL	03/31/2004 20:55:00.000	TT2	U133Plus-P978	52.0686	male	white	FLC	2.3	1.5	0.8	210	4.5	14.2	15	20	23	1	0	0	53.4667	0	53.4667	Training	0	0	0	1952-02-17	2004-01-08	2004-01-21		2008-06-12		0	0	2008-06-12	2008-06-12	53	53
350	16356	P0979-01-C870-U133Plus-2.CEL	03/31/2004 20:31:00.000	TT2	U133Plus-P979	54.0755	female	white	IgG	15.5	11.9	5.6	149	4.4	10.5		50	1	0	1	0	53.3333	0	53.3333	Training	0	0	0	1950-02-10	2004-01-07	2004-01-15		2008-06-02		0	0	2008-06-02	2008-06-02	53	53
351	16338	P0981-01-C890-U133Plus-2.CEL	04/02/2004 19:40:00.000	TT2	U133Plus-P981	60.8538	male	white	IgA	3.7	16.8	1.4	157	4.8	12.7	42	50	28	1	0	0	53.8333	0	53.8333	Training	1	0	0	1943-05-15	2004-01-05	2004-01-21		2008-06-23		0	0	2008-06-23	2008-06-23	53	53
353	16205	P0986-01-C780-U133Plus-2.CEL	04/06/2004 18:10:00.000	TT2	U133Plus-P986	64.8538	female	other	IgA	3.6	11.1	0.8	152	3.5	10.9	65	70		0	0	1	12.6	1	12.6	Training	0	1	1	1939-05-15	2003-11-25	2004-01-07		2005-01-19	2005-01-19	0	1	2005-01-19	2005-01-19	12	14
354	16438	P0990-02-C968-U133Plus-2.CEL	04/15/2004 15:47:00.000	TT3	U133Plus-P990-2	61	male	white	IgA	2.2	2.4	1.1	145	4.3	13	34	30	24	1	1	0	52.4	0	52.4	Validation	1	0	0	1943-05-11	2004-01-28	2004-02-27		2008-06-17		0	0	2008-06-17	2008-06-17	52	53
355	16462	P0993-00-D003-U133Plus-2.CEL	04/15/2004 12:37:00.000	TT3	U133Plus-P993-0	53	male	white	IgA	3.9	3	1.2	120	4.5	10.9	35	30	2	1	0	0	51.5333	0	51.5333	Validation	0	0	0	1951-09-19	2004-02-04	2004-03-18		2008-06-11		0	0	2008-06-11	2008-06-11	51	52
356	16626	P0995-02-D102-U133Plus-2.CEL	05/26/2004 14:55:00.000	TT3	U133Plus-P995-2	61	female	white	IgG	2	9.2	0.7	146	4.3	15.4	7	15	43	0	0	0	50.9333	0	50.9333	Validation	1	0	0	1943-01-23	2004-03-11	2004-04-14		2008-06-20		0	0	2008-06-20	2008-06-20	50	51
357	16563	P0996-04-D062-U133Plus-2.CEL	04/28/2004 17:56:00.000	TT3	U133Plus-P996-4	61	female	white	IgG	3.2	4.8	0.8	160	4	11	10	15	8	0	1	1	20.5	1	29.0333	Validation	1	1	0	1942-10-23	2004-02-25	2004-03-23	2005-11-28	2006-08-11	2006-08-11	1	1	2005-11-28	2006-08-11	20	30
358	16593	P0997-02-D076-U133Plus-2.CEL	04/22/2004 16:27:00.000	TT3	U133Plus-P997-2	64	male	white	IgG	2.3	3.7	1.2	132	4.3	15.7			6	1	1	0	51.3667	0	51.3667	Validation	0	0	0	1939-12-17	2004-03-02	2004-03-30		2008-06-18		0	0	2008-06-18	2008-06-18	51	51
359	16574	P1003-02-D033-U133Plus-2.CEL	04/15/2004 15:59:00.000	TT3	U133Plus-P1003-2	61	male	white	IgG	11.3	5.8	1.1	187	3.2	9.6	90	90	0	1	1	1	27.0333	1	40.6333	Validation	1	0	0	1943-05-04	2004-02-26	2004-03-03	2006-05-23	2007-07-05	2007-07-05	1	1	2006-05-23	2007-07-05	26	41
360	16570	P1010-01-D039-U133Plus-2.CEL	04/27/2004 21:35:00.000	TT3	U133Plus-P1010	55	male	white	IgG	4.2	3.3	1	119	4.7	11	70	80	0	1	1	0	52.4	0	52.4	Validation	0	0	0	1949-01-28	2004-02-25	2004-03-05		2008-06-24		0	0	2008-06-24	2008-06-24	51	52
361	16518	P1011-01-D025-U133Plus-2.CEL	04/27/2004 21:11:00.000	TT3	U133Plus-P1011	66	female	white	IgA	5.8	9.4	1.2	243	4.1	8.7	80	90	0	0	1	0	51.5667	0	51.5667	Validation	1	0	0	1938-02-15	2004-02-18	2004-03-03		2008-05-28		0	0	2008-05-28	2008-05-28	50	51
362	16600	P1013-01-D098-U133Plus-2.CEL	04/29/2004 11:03:00.000	TT3	U133Plus-P1013	53	male	white	IgG	2.7	14.9	1	146	5	13.3		4.9	5	1	1	0	50.8667	0	50.8667	Validation	0	0	0	1951-05-04	2004-03-04	2004-03-30		2008-06-03		0	0	2008-06-03	2008-06-03	51	51
363	9995	P1016-04-E483-U133Plus-2.CEL	07/14/2005 12:32:00.000	TT3	U133Plus-P1016-04	63	female	white	IgG	3	0.99	0.7	146	4.5	9.8	46	81	0	0	0	0	38.7	0	38.7	Validation	0	0	0	1942-01-01	2000-06-26	2005-04-07		2008-06-11		0	0	2008-06-11	2008-06-11	38	96
364	16608	P1017-01-D092-U133Plus-2.CEL	04/28/2004 18:21:00.000	TT3	U133Plus-P1017	56	male	white	IgA	2.1	0.99	0.8	135	4.3	11.8	39	50	0	1	0	0	48.0667	0	48.0667	Validation	0	0	0	1947-12-10	2004-03-07	2004-04-19		2008-03-31		0	0	2008-03-31	2008-03-31	47	48
365	16482	P1023-01-D006-U133Plus-2.CEL	04/30/2004 20:40:00.000	TT3	U133Plus-P1023	57	female	white	IgA	2.2	0.99	0.7	138	5.2	12.9	30	40	2	0	0	0	51.0667	0	51.0667	Validation	0	0	0	1946-11-23	2004-02-09	2004-03-24		2008-06-03		0	0	2008-06-03	2008-06-03	51	52
366	16586	P1027-02-D051-U133Plus-2.CEL	05/26/2004 11:01:00.000	TT3	U133Plus-P1027-2	52	male	white	IgG	2	0.99	1	158	3.8	13	20		4	1	1	0	50.5667	0	50.5667	Validation	0	0	0	1952-08-08	2004-03-02	2004-04-08		2008-06-03		0	0	2008-06-03	2008-06-03	50	51
367	16623	P1049-01-D097-U133Plus-2.CEL	05/21/2004 13:25:00.000	TT3	U133Plus-P1049	53	female	white	IgG	8.1	15.6	1.6	238	4	11.6	80	81	7	0	1	0	51.5	0	51.5	Validation	0	0	0	1951-08-17	2004-03-10	2004-03-31		2008-06-23		0	0	2008-06-23	2008-06-23	51	51
368	16621	P1052-01-D070-U133Plus-2.CEL	05/26/2004 13:13:00.000	TT3	U133Plus-P1052	63	male	white	IgG	6.2	28.6	1.2	124	3	9.1	55	60	0	1	1	0	51.6333	0	51.6333	Validation	0	0	0	1940-12-31	2004-03-10	2004-03-23		2008-06-19		0	0	2008-06-19	2008-06-19	51	51
369	16215	P1053-02-D082-U133Plus-2.CEL	05/26/2004 12:36:00.000	TT3	U133Plus-P1053-2	55	male	white	IgA	5.7	2.4	1.3	150	3.7	11.1	70	60	8	1	0	0	51.0667	0	51.0667	Validation	1	0	0	1949-04-08	2003-12-01	2004-03-31		2008-06-10		0	0	2008-06-10	2008-06-10	51	54
370	16740	P1055-03-D246-U133Plus-2.CEL	07/29/2004 19:01:00.000	TT3	U133Plus-P1055-3	73	male	white	IgG	2	0.99	0.8	168	4.1	13.2	7.5	4.9	18	1	0	0	49.6667	0	49.6667	Validation	0	0	0	1931-05-06	2004-04-14	2004-04-28		2008-05-27		0	0	2008-05-27	2008-05-27	49	49
371	16496	P1063-01-C981-U133Plus-2.CEL	05/26/2004 11:41:00.000	TT3	U133Plus-P1063	60	male	other	FLC	4.9	25.9	0.8	245	3.9	10.5	81		2	1	0	0	52.5333	0	52.5333	Validation	0	0	0	1943-12-20	2004-02-10	2004-02-25		2008-06-19		0	0	2008-06-19	2008-06-19	52	52
372	16464	P1064-01-C986-U133Plus-2.CEL	05/26/2004 10:48:00.000	TT3	U133Plus-P1064	48	female	white	IgA	4	2.2	0.8	98	4	10.2		70	10	0	1	0	46.6333	0	46.6333	Validation	0	0	0	1956-09-05	2004-02-04	2004-03-16		2008-01-14		0	0	2008-01-14	2008-01-14	46	47
373	16490	P1065-01-D005-U133Plus-2.CEL	05/26/2004 16:15:00.000	TT3	U133Plus-P1065	70	male	white	IgG	26.1	57.5	8.6	121	3.3	9.7	50	81	0	1	0	1	1.2	1	1.2	Validation	0	1	1	1934-01-24	2004-02-10	2004-03-05		2004-04-10	2004-04-10	0	1	2004-04-10	2004-04-10	1	2
374	16648	P1066-01-D115-U133Plus-2.CEL	05/26/2004 12:49:00.000	TT3	U133Plus-P1066	69	male	white	FLC	2.4	0.99	1.2	217	4.3	13.7	55	50	0	1	0	1	4.06667	1	40.7	Validation	0	1	0	1934-11-30	2004-03-17	2004-04-12	2004-08-12	2007-08-16	2007-08-16	1	1	2004-08-12	2007-08-16	4	41
375	16581	P1067-01-D131-U133Plus-2.CEL	05/26/2004 14:06:00.000	TT3	U133Plus-P1067	54	male	white	IgG	2	0.99	0.9	150	5.3	13.5	30	30	0	1	1	0	51	0	51	Validation	0	0	0	1950-05-15	2004-03-01	2004-04-05		2008-06-13		0	0	2008-06-13	2008-06-13	50	51
376	16628	P1068-01-D099-U133Plus-2.CEL	05/26/2004 12:11:00.000	TT3	U133Plus-P1068	47	male	white	FLC	12.8	38.3	6	267	3.6	8.9	39	50	14	1	1	1	25.1	0	51.5667	Validation	0	0	0	1956-11-28	2004-03-11	2004-03-24	2006-04-16	2008-06-18		1	0	2006-04-16	2008-06-18	25	51
377	16730	P1070-01-D245-U133Plus-2.CEL	06/04/2004 12:02:00.000	TT3	U133Plus-P1070	32	female	white	FLC	2.6	4.6	0.6	202	4.9	11.1	24	15	0	0	0	0	49.1	0	49.1	Validation	0	0	0	1971-11-26	2004-04-12	2004-05-17		2008-05-29		0	0	2008-05-29	2008-05-29	48	49
378	16766	P1077-02-D264-U133Plus-2.CEL	07/29/2004 14:10:00.000	TT3	U133Plus-P1077-2	75	male	white	IgG	2.9	2.3	1.1	122	3.8	12.6	13	4.9	12	1	0	0	49.4333	0	49.4333	Validation	0	0	0	2029-11-16	2004-04-22	2004-05-28		2008-06-19		0	0	2008-06-19	2008-06-19	49	50
379	16767	P1079-02-D278-U133Plus-2.CEL	07/09/2004 16:23:00.000	TT3	U133Plus-P1079-2	61	male	white	IgG	1.9	12.9	0.8	129	4	12.7	20	17.5	3	1	1	1	13.1667	1	13.1667	Validation	0	1	1	1943-03-28	2004-04-22	2004-05-17		2005-06-16	2005-06-16	0	1	2005-06-16	2005-06-16	13	14
380	16803	P1080-02-D300-U133Plus-2.CEL	07/13/2004 17:44:00.000	TT3	U133Plus-P1080-2	59	female	white	FLC	6.9	2.7	1	296	4.6	12.2	63	30	37	0	0	0	49.6667	0	49.6667	Validation	1	0	0	1945-05-27	2004-05-03	2004-05-12		2008-06-10		0	0	2008-06-10	2008-06-10	49	49
381	16777	P1081-02-D279-U133Plus-2.CEL	06/25/2004 13:53:00.000	TT3	U133Plus-P1081-2	49	male	white	IgG	5.1	120.4	0.8	221	3.7	9.1	46	65	20	1	0	1	43.1	0	49.9	Validation	1	0	0	1955-01-20	2004-04-26	2004-05-14	2007-11-28	2008-06-19		1	0	2007-11-28	2008-06-19	42	50
382	16715	P1086-01-D205-U133Plus-2.CEL	07/30/2004 14:22:00.000	TT3	U133Plus-P1086	57	male	white	IgG	2.6	3.6	1.3	102	3.9	8.7	33.5	50	2	1	0	0	49	0	49	Validation	0	0	0	1947-07-19	2004-04-06	2004-05-19		2008-05-28		0	0	2008-05-28	2008-05-28	48	49
383	16776	P1088-01-D251-U133Plus-2.CEL	07/01/2004 15:00:00.000	TT3	U133Plus-P1088	52	female	white	IgA	8.1	80.6	1.9	596	3.5	9.6		81		0	0	1	7.66667	1	8.46667	Validation	1	1	1	1952-01-23	2004-04-26	2004-04-28	2004-12-14	2005-01-07	2005-01-07	1	1	2004-12-14	2005-01-07	8	9
384	16773	P1092-01-D262-U133Plus-2.CEL	07/01/2004 14:48:00.000	TT3	U133Plus-P1092	56	male	white	IgG	9.1	43.7	2.7	290	3.9	8.7	74	81	15	1	0	1	21.9667	1	21.9667	Validation	1	1	1	1948-04-07	2004-04-26	2004-05-07		2006-02-25	2006-02-25	0	1	2006-02-25	2006-02-25	21	22
385	16898	P1093-01-D394-U133Plus-2.CEL	07/01/2004 14:35:00.000	TT3	U133Plus-P1093	53	female	white	IgG	8.2	2	0.9	149	4	9.1	52	81	14	0	1	1	26.3667	1	43.9	Validation	0	0	0	1951-03-01	2004-05-24	2004-06-02	2006-08-02	2008-01-10	2008-01-10	1	1	2006-08-02	2008-01-10	26	44
386	16933	P1094-01-D451-U133Plus-2.CEL	07/01/2004 12:06:00.000	TT3	U133Plus-P1094	67	male	white	IgA	3.9	4.3	0.7	139	4.2	10.5	70	81	40	1	1	1	15.6	1	15.6	Validation	0	1	1	1937-06-19	2004-06-04	2004-06-17		2005-09-28	2005-09-28	0	1	2005-09-28	2005-09-28	15	15
387	16920	P1100-01-D431-U133Plus-2.CEL	07/01/2004 15:13:00.000	TT3	U133Plus-P1100	58	female	white	IgG	2.5	0.99	0.8	164	4.8	10.9	44	60	1	0	0	0	47.8667	0	47.8667	Validation	1	0	0	1946-10-28	2004-05-28	2004-07-14		2008-06-19		0	0	2008-06-19	2008-06-19	47	49
388	16948	P1101-02-D459-U133Plus-2.CEL	07/29/2004 15:13:00.000	TT3	U133Plus-P1101-2	59	female	white	IgG	16.2	3.4	3.4	146	4.4	10.1	30	30	2	0	0	0	45	0	45	Validation	1	0	0	1945-05-17	2004-06-08	2004-06-25		2008-03-06		0	0	2008-03-06	2008-03-06	45	45
389	16827	P1112-01-D320-U133Plus-2.CEL	07/13/2004 17:06:00.000	TT3	U133Plus-P1112	64	male	white	FLC	2.7	2.6	0.9	249	4.1	12		5	1	1	1	1	17.7	1	20	Validation	1	1	1	1940-08-11	2004-05-07	2004-05-26	2005-11-08	2006-01-16	2006-01-16	1	1	2005-11-08	2006-01-16	18	20
390	16869	P1113-01-D323-U133Plus-2.CEL	07/13/2004 14:16:00.000	TT3	U133Plus-P1113	54	male	white	IgG	3.8	125.6	0.8	148	2.8	10.3	25	20	10	1	1	0	49.2	0	49.2	Validation	0	0	0	1950-05-12	2004-05-17	2004-05-19		2008-06-03		0	0	2008-06-03	2008-06-03	49	49
391	16829	P1114-01-D342-U133Plus-2.CEL	07/13/2004 13:51:00.000	TT3	U133Plus-P1114	50	female	other	IgA	1.5	0.99	0.9	116	4	11.8	40	50	0	0	1	0	44.7	0	44.7	Validation	1	0	0	1955-01-11	2004-05-08	2004-10-15		2008-06-17		0	0	2008-06-17	2008-06-17	44	49
392	16938	P1116-00-D453-U133Plus-2.CEL	07/28/2004 15:36:00.000	TT3	U133Plus-P1116-0	68	female	white	IgA	3.2	8.7	0.9	249	3.5	10.9	10	10	18	0	0	1	14.8333	1	14.8333	Validation	0	1	1	1936-07-06	2004-06-04	2004-06-18		2005-09-06	2005-09-06	0	1	2005-09-06	2005-09-06	15	15
393	16844	P1117-00-D346-U133Plus-2.CEL	07/28/2004 16:01:00.000	TT3	U133Plus-P1117-0	47	male	white	IgG	1.5	2.5	0.8	115	4.3	12.2	30	30	4	1	1	0	48.2333	0	48.2333	Validation	0	0	0	1957-09-29	2004-05-11	2004-06-18		2008-06-04		0	0	2008-06-04	2008-06-04	48	49
394	16976	P1118-00-D465-U133Plus-2.CEL	07/29/2004 14:35:00.000	TT3	U133Plus-P1118-0	57	male	white	IgG	32.1	49.6	9.9	157	3.4	11.3	32	50		1	1	0	45.2	0	45.2	Validation	0	0	0	1947-12-18	2004-06-15	2004-06-19		2008-03-06		0	0	2008-03-06	2008-03-06	45	45
395	16986	P1119-01-D487-U133Plus-2.CEL	07/15/2004 14:13:00.000	TT3	U133Plus-P1119	61	male	white	IgG	4.8	0.99	1.5	96	4.2	13	36	70	8	1	1	0	46.1333	0	46.1333	Validation	0	0	0	1943-06-21	2004-06-16	2004-09-08		2008-06-23		0	0	2008-06-23	2008-06-23	45	48
396	16333	P1120-01-C865-U133Plus-2.CEL	07/29/2004 19:14:00.000	TT3	U133Plus-P1120	62	male	white	IgG	2.9	1.1	0.8	200	4.6	13.8	20	4.9	4	1	0	0	48.6667	0	48.6667	Validation	1	0	0	1942-07-31	2003-12-31	2004-06-17		2008-06-16		0	0	2008-06-16	2008-06-16	48	54
397	16985	P1121-01-D491-U133Plus-2.CEL	07/15/2004 17:02:00.000	TT3	U133Plus-P1121	58	female	white	IgG	2.1	0.99	0.9	148	4.2	12	38	40	0	0	1	0	40.7667	0	40.7667	Validation	0	0	0	1946-12-02	2004-06-16	2005-01-14		2008-05-21		0	0	2008-05-21	2008-05-21	40	47
398	16940	P1122-00-D443-U133Plus-2.CEL	07/28/2004 14:09:00.000	TT3	U133Plus-P1122-0	49	female	other	IgG	5.9	6.8	0.8	168	3.9	11.1	81	70	27	0	0	1	4.63333	1	4.63333	Validation	0	1	1	1955-09-02	2004-06-07	2004-06-23		2004-11-09	2004-11-09	0	1	2004-11-09	2004-11-09	5	5
399	16922	P1130-03-D440-U133Plus-2.CEL	09/08/2004 14:52:00.000	TT3	U133Plus-P1130-3	61	male	white	FLC	5.9	2.6	1.9	190	4.2	10.2	65	81	27	1	1	0	48.1667	0	48.1667	Validation	1	0	0	1943-06-03	2004-06-01	2004-07-02		2008-06-16		0	0	2008-06-16	2008-06-16	47	48
400	16966	P1132-03-D485-U133Plus-2.CEL	09/08/2004 12:45:00.000	TT3	U133Plus-P1132-3	46	female	white	FLC	2.4	5.8	0.6	179	4.4	13.2	10	7.5	10	0	0	0	47.8667	0	47.8667	Validation	0	0	0	1958-09-15	2004-06-11	2004-07-08		2008-06-13		0	0	2008-06-13	2008-06-13	47	48
401	16864	P1138-02-D405-U133Plus-2.CEL	09/03/2004 13:28:00.000	TT3	U133Plus-P1138-2	67	male	white	FLC	3.1	3.6	1	151	4.4	11.9	50	50	22	1	1	0	48.3333	0	48.3333	Validation	0	0	0	1937-12-23	2004-05-14	2004-06-30		2008-06-19		0	0	2008-06-19	2008-06-19	48	49
402	16739	P1139-01-D229-U133Plus-2.CEL	07/29/2004 14:23:00.000	TT3	U133Plus-P1139	65	female	white	FLC	5.8	25.2	1.1	198	3.9	10.5	30	30	26	0	0	0	49.8333	0	49.8333	Validation	0	0	0	1939-09-19	2004-04-14	2004-04-29		2008-06-02		0	0	2008-06-02	2008-06-02	50	50
403	16820	P1140-01-D331-U133Plus-2.CEL	07/28/2004 17:54:00.000	TT3	U133Plus-P1140	74	male	white	IgG	3.8	4.6	1	180	3.3	10.5	60	60	3	1	1	0	48.7667	0	48.7667	Validation	0	0	0	1930-11-01	2004-05-05	2004-06-02		2008-06-04		0	0	2008-06-04	2008-06-04	48	49
404	16839	P1141-01-D334-U133Plus-2.CEL	07/28/2004 18:44:00.000	TT3	U133Plus-P1141	72	male	white	IgA	2.9	0.99	1	88	4.5	10	60	70	0	1	1	1	43.3667	0	49.7333	Validation	0	0	0	1932-02-06	2004-05-10	2004-05-18	2007-12-10	2008-06-18		1	0	2007-12-10	2008-06-18	43	49
405	16843	P1142-01-D343-U133Plus-2.CEL	07/28/2004 18:59:00.000	TT3	U133Plus-P1142	68	female	white	IgG	2.5	2.3	0.7	148	4	11.7	20	20	0	0	0	0	49.8667	0	49.8667	Validation	0	0	0	1936-09-25	2004-05-11	2004-05-20		2008-06-24		0	0	2008-06-24	2008-06-24	49	49
406	16714	P1143-01-D215-U133Plus-2.CEL	07/29/2004 12:19:00.000	TT3	U133Plus-P1143	66	male	white	IgG	2.5	32.5	1	127	4.4	12.7	40	40	8	1	1	0	50.0667	0	50.0667	Validation	0	0	0	1938-05-30	2004-04-06	2004-05-14		2008-06-24		0	0	2008-06-24	2008-06-24	49	50
407	16868	P1144-01-D361-U133Plus-2.CEL	07/28/2004 11:40:00.000	TT3	U133Plus-P1144	49	female	white	FLC	6.4	18.6	0.7	247	3.6	10.6		30		0	1	0	49.2	0	49.2	Validation	1	0	0	1954-12-12	2004-05-15	2004-05-28		2008-06-12		0	0	2008-06-12	2008-06-12	49	49
408	16935	P1145-01-D422-U133Plus-2.CEL	07/28/2004 12:17:00.000	TT3	U133Plus-P1145	58	male	white	IgG	2.9	0.99	1.2	133	4.4	11.8	44	35	0	1	0	0	48.2333	0	48.2333	Validation	0	0	0	1946-05-01	2004-06-04	2004-06-11		2008-05-28		0	0	2008-05-28	2008-05-28	47	47
409	16764	P1146-01-D263-U133Plus-2.CEL	07/29/2004 18:49:00.000	TT3	U133Plus-P1146	72	male	white	IgG	5.9	1.8	1.3	209	3.4	8.7	60	81	0	1	0	1	10.5667	1	10.5667	Validation	1	1	1	1932-07-13	2004-04-21	2004-05-28		2005-04-10	2005-04-10	0	1	2005-04-10	2005-04-10	11	12
410	16744	P1164-01-D505-U133Plus-2.CEL	08/25/2004 17:05:00.000	TT3	U133Plus-P1164	64	male	other	IgG	2.4	11	0.8	117	4.2	11.1	42	50	0	1	1	0	47.5333	0	47.5333	Validation	0	0	0	1941-01-01	2004-04-16	2004-07-02		2008-05-28		0	0	2008-05-28	2008-05-28	46	49
411	16914	P1165-01-D454-U133Plus-2.CEL	08/25/2004 16:53:00.000	TT3	U133Plus-P1165	45	male	white	FLC	1.3	3.6	0.8	166	4.6	13	20	10	4	1	0	0	46.7	0	46.7	Validation	0	0	0	1959-05-29	2004-05-27	2004-06-29		2008-04-30		0	0	2008-04-30	2008-04-30	46	47
412	16979	P1166-01-D468-U133Plus-2.CEL	09/03/2004 13:53:00.000	TT3	U133Plus-P1166	48	female	white	IgG	9.8	17.9	1.9	300	4.7	9.8	75	75	6	0	1	1	5.33333	1	5.33333	Validation	1	1	1	1956-10-30	2004-06-15	2004-06-30		2004-12-07	2004-12-07	0	1	2004-12-07	2004-12-07	6	6
413	16896	P1167-01-D486-U133Plus-2.CEL	09/10/2004 16:36:00.000	TT3	U133Plus-P1167	68	male	white	FLC	2	7.3	1	159	4.3	12.4	4.9	7.5	66	1	0	0	47.4	0	47.4	Validation	0	0	0	1936-10-12	2004-05-21	2004-07-07		2008-05-29		0	0	2008-05-29	2008-05-29	46	48
414	16995	P1169-01-D553-U133Plus-2.CEL	08/27/2004 17:12:00.000	TT3	U133Plus-P1169	49	male	white	IgG	3.1	60.1	0.8	119	2.6	11.3	34	10	4	1	0	1	42.6667	0	47.1	Validation	0	0	0	1955-06-17	2004-06-17	2004-08-11	2008-02-12	2008-06-24		1	0	2008-02-12	2008-06-24	42	48
415	16988	P1173-01-D516-U133Plus-2.CEL	09/08/2004 11:55:00.000	TT3	U133Plus-P1173	66	male	white	FLC	2.5	5.2	1.5	174	4.5	16.9	30	30	13	1	1	0	47.3667	0	47.3667	Validation	0	0	0	1938-04-27	2004-06-16	2004-07-20		2008-06-10		0	0	2008-06-10	2008-06-10	47	48
416	17037	P1176-01-D600-U133Plus-2.CEL	09/01/2004 16:16:00.000	TT3	U133Plus-P1176	36	female	other	IgG	23.2	5.5	4.3	162	3	7.9	81	81	0	0	1	1	20.0667	1	28.8	Validation	1	1	0	1968-03-12	2004-07-02	2004-07-21	2006-03-15	2006-12-02	2006-12-02	1	1	2006-03-15	2006-12-02	20	29
417	17113	P1177-01-D639-U133Plus-2.CEL	09/02/2004 14:49:00.000	TT3	U133Plus-P1177	67	male	white	IgG	1.7	1.4	0.7	123	4.4	12.5	15	10	1	1	0	0	46.6667	0	46.6667	Validation	0	0	0	1937-10-15	2004-07-21	2004-08-12		2008-06-12		0	0	2008-06-12	2008-06-12	46	47
418	17004	P1178-01-D566-U133Plus-2.CEL	09/02/2004 15:14:00.000	TT3	U133Plus-P1178	59	male	white	IgA	1.9	25.2	0.7	102	4.2	11.4	28	30	0	1	0	0	46.0333	0	46.0333	Validation	0	0	0	1945-04-09	2004-06-22	2004-08-10		2008-05-22		0	0	2008-05-22	2008-05-22	45	47
419	17087	P1181-01-D629-U133Plus-2.CEL	09/08/2004 13:50:00.000	TT3	U133Plus-P1181	67	male	white	IgG	3	3.7	1.1	133	4	9.3	10	7.5	11	1	0	1	10.9667	1	41.4667	Validation	0	1	0	1937-06-10	2004-07-19	2004-08-06	2005-07-01	2008-01-02	2008-01-02	1	1	2005-07-01	2008-01-02	11	42
420	17068	P1182-01-D617-U133Plus-2.CEL	09/08/2004 12:58:00.000	TT3	U133Plus-P1182	68	male	white	IgG	9.2	1	1.5	202	3.9	9.8	39	80	1	1	1	0	47.2333	0	47.2333	Validation	0	0	0	1936-09-10	2004-07-14	2004-08-06		2008-06-23		0	0	2008-06-23	2008-06-23	46	47
421	16900	P1183-01-D417-U133Plus-2.CEL	09/08/2004 12:33:00.000	TT3	U133Plus-P1183	50	male	white	FLC	11.1	3.5	6	190	5.1	9.2	14	70	0	1	0	0	43.8333	0	43.8333	Validation	0	0	0	1954-08-11	2004-05-25	2004-06-30		2008-02-05		0	0	2008-02-05	2008-02-05	44	45
422	17075	P1184-01-D637-U133Plus-2.CEL	09/08/2004 12:20:00.000	TT3	U133Plus-P1184	67	male	white	IgG	8.4	178.5	2.9	177	3	9.1	21	40	0	1	1	1	31.4667	0	47.4667	Validation	0	0	0	1937-05-08	2004-07-15	2004-07-30	2007-03-01	2008-06-23		1	0	2007-03-01	2008-06-23	32	47
423	17040	P1185-01-D588-U133Plus-2.CEL	09/08/2004 11:42:00.000	TT3	U133Plus-P1185	66	male	white	IgG	3.4	7	1.3	166	3.5	9.1		30	3	1	1	0	47.4667	0	47.4667	Validation	0	0	0	1938-08-27	2004-07-07	2004-07-30		2008-06-23		0	0	2008-06-23	2008-06-23	47	47
424	17051	P1186-01-D612-U133Plus-2.CEL	09/28/2004 17:12:00.000	TT3	U133Plus-P1186	60	male	white	IgG	5	2.8	1.1	108	4.2	9.5	42	80	0	1	1	0	46.2667	0	46.2667	Validation	0	0	0	1944-10-26	2004-07-08	2004-08-09		2008-05-28		0	0	2008-05-28	2008-05-28	45	46
425	16946	P1187-01-D657-U133Plus-2.CEL	09/08/2004 14:02:00.000	TT3	U133Plus-P1187	46	female	white	IgA	1.6	0.99	0.6	229	5	12.1	29	35	0	0	1	1	33.2333	0	46.9667	Validation	0	0	0	1958-07-09	2004-06-08	2004-08-03	2007-04-27	2008-06-12		1	0	2007-04-27	2008-06-12	32	48
426	17029	P1188-01-D658-U133Plus-2.CEL	09/08/2004 14:27:00.000	TT3	U133Plus-P1188	69	female	white	IgG	3.4	8.6	0.6	116	3.8	12	37	40	2	0	0	1	35	1	35	Validation	0	0	0	1935-06-25	2004-07-01	2004-08-09		2007-06-25	2007-06-25	0	1	2007-06-25	2007-06-25	34	35
427	17138	P1189-01-D662-U133Plus-2.CEL	09/24/2004 16:26:00.000	TT3	U133Plus-P1189	55	female	white	IgA	5.1	9.7	1.2	485	4	12.1	18	20	11	0	0	1	4.53333	1	6.86667	Validation	1	1	1	1949-04-26	2004-07-29	2004-08-16	2004-12-30	2005-03-10	2005-03-10	1	1	2004-12-30	2005-03-10	4	8
428	17162	P1190-01-D723-U133Plus-2.CEL	09/10/2004 14:13:00.000	TT3	U133Plus-P1190	66	female	white	IgA	3.5	1.7	0.6	153	4	9.9	7.5	20		0	1	0	45.8667	0	45.8667	Validation	0	0	0	1938-06-07	2004-08-05	2004-08-27		2008-06-03		0	0	2008-06-03	2008-06-03	46	46
429	17207	P1191-01-D722-U133Plus-2.CEL	09/10/2004 14:26:00.000	TT3	U133Plus-P1191	56	male	white	IgG	2.4	0.99	0.9	130	4.4	14.9	17	10	1	1	0	0	44.4667	0	44.4667	Validation	0	0	0	1948-06-28	2004-08-13	2004-10-15		2008-06-10		0	0	2008-06-10	2008-06-10	44	46
430	17098	P1195-01-D624-U133Plus-2.CEL	09/21/2004 12:11:00.000	TT3	U133Plus-P1195	62	male	white	IgA	2.3	10.4	1	85	3.9	13.1	50	70	0	1	1	1	37.7333	1	37.7333	Validation	0	0	0	1942-09-12	2004-07-20	2004-08-21		2007-09-27	2007-09-27	0	1	2007-09-27	2007-09-27	37	38
431	16895	P1196-01-D432-U133Plus-2.CEL	09/28/2004 16:58:00.000	TT3	U133Plus-P1196	61	male	white	IgG	2.5	0.99	1.2	121	3.6	11	44	50	0	1	0	0	47.8333	0	47.8333	Validation	0	0	0	1943-02-19	2004-05-21	2004-07-12		2008-06-16		0	0	2008-06-16	2008-06-16	47	49
432	17188	P1201-01-D769-U133Plus-2.CEL	09/28/2004 12:50:00.000	TT3	U133Plus-P1201	52	male	white	IgG	8.3	13.2	1.6	109	3.1	12.6	19	60	45	1	1	0	44.5333	0	44.5333	Validation	0	0	0	1953-03-13	2004-08-09	2004-08-31		2008-04-28		0	0	2008-04-28	2008-04-28	44	44
433	16965	P1223-02-D452-U133Plus-2.CEL	07/28/2004 13:44:00.000	TT3	U133Plus-P1223-02	69	male	white	IgG	29.5	25	4.5	116	2.1	10.5	19	81	49	1	0	1	7.23333	1	7.23333	Validation	1	1	1	1935-10-04	2004-06-11	2004-06-24		2005-01-27	2005-01-27	0	1	2005-01-27	2005-01-27	7	7
434	17226	P1224-01-D803-U133Plus-2.CEL	09/24/2004 11:18:00.000	TT3	U133Plus-P1224	51	male	other	IgA	1.3	8.7	0.9	120	4.3	11.1	45	50	57	1	0	0	45.7	0	45.7	Validation	1	0	0	1953-03-29	2004-08-20	2004-09-09		2008-06-11		0	0	2008-06-11	2008-06-11	45	46
435	17239	P1225-01-D807-U133Plus-2.CEL	09/24/2004 16:56:00.000	TT3	U133Plus-P1225	67	male	white	IgG	2	13.8	0.6	134	4.9	13.4	4.9	4.9	9	1	0	1	37.8	0	46.0667	Validation	0	0	0	1937-10-22	2004-08-25	2004-09-10	2007-10-19	2008-06-23		1	0	2007-10-19	2008-06-23	37	46
436	17304	P1228-01-D816-U133Plus-2.CEL	09/24/2004 12:59:00.000	TT3	U133Plus-P1228	50	male	white	FLC	5.9	27.9	2.8	123	4.2	10.7	50	50	46	1	0	0	40.5333	0	40.5333	Validation	0	0	0	1954-07-01	2004-09-13	2004-09-17		2008-01-16		0	0	2008-01-16	2008-01-16	40	40
437	17050	P1231-01-D615-U133Plus-2.CEL	09/24/2004 13:36:00.000	TT3	U133Plus-P1231	71	male	white	FLC	2.5	0.99	1.1	124	4.8	12.1	60	70	0	1	1	0	46.1667	0	46.1667	Validation	0	0	0	1933-04-26	2004-07-08	2004-08-24		2008-06-09		0	0	2008-06-09	2008-06-09	46	47
438	17140	P1232-01-D646-U133Plus-2.CEL	09/24/2004 16:13:00.000	TT3	U133Plus-P1232	68	female	white	IgG	10.4	2.3	1.9	138	3.9	10.8	70	81	0	0	0	1	41.9	0	47	Validation	1	0	0	1936-09-12	2004-07-30	2004-08-13	2008-01-22	2008-06-23		1	0	2008-01-22	2008-06-23	41	47
439	17199	P1235-01-D729-U133Plus-2.CEL	09/28/2004 14:06:00.000	TT3	U133Plus-P1235	64	male	white	IgG	21	66.1	1.3	154	2.5	10.6	30	40	0	1	1	1	15.1333	1	15.1333	Validation	1	1	1	1940-10-01	2004-08-10	2004-08-25		2005-11-22	2005-11-22	0	1	2005-11-22	2005-11-22	15	15
440	17216	P1236-01-D742-U133Plus-2.CEL	09/28/2004 14:43:00.000	TT3	U133Plus-P1236	52	male	white	IgG	1.9	2	0.9	141	3.7	10.5	70	40	4	1	1	1	25.9333	1	37.2333	Validation	1	0	0	1952-12-10	2004-08-18	2004-08-30	2006-10-17	2007-09-21	2007-09-21	1	1	2006-10-17	2007-09-21	26	37
441	17235	P1239-01-D778A-U133Plus-2.CEL	09/28/2004 11:47:00.000	TT3	U133Plus-P1239	65	male	white	IgA	3	0.99	1.1	146	4.3	11.2	70	81		1	1	0	45	0	45	Validation	0	0	0	1939-04-19	2004-08-24	2004-09-17		2008-05-29		0	0	2008-05-29	2008-05-29	44	45
442	17244	P1248-01-D777-U133Plus-2.CEL	09/28/2004 13:41:00.000	TT3	U133Plus-P1248	63	male	white	IgG	2.9	1.6	1.2	146	4.3	12.3	70	40		1	1	0	44.1667	0	44.1667	Validation	1	0	0	1942-01-17	2004-08-26	2004-09-15		2008-05-02		0	0	2008-05-02	2008-05-02	44	45
443	17302	P1259-01-D865-U133Plus-2.CEL	10/14/2004 14:23:00.000	TT3	U133Plus-P1259	70	male	white	IgG	5.5	8.5	1	87	3.7	9.8	31	91		1	1	1	25.4667	0	45.2667	Validation	0	0	0	1934-10-29	2004-09-13	2004-09-29	2006-11-02	2008-06-18		1	0	2006-11-02	2008-06-18	26	45
444	17136	P1263-01-D755-U133Plus-2.CEL	10/19/2004 12:48:00.000	TT3	U133Plus-P1263	61	male	white	IgG	3.4	0.99	1.2	108	4.7	12	38	7.5	3	1	1	0	45.4333	0	45.4333	Validation	0	0	0	1943-08-26	2004-07-29	2004-09-30		2008-06-24		0	0	2008-06-24	2008-06-24	45	47
445	17333	P1271-01-D891-U133Plus-2.CEL	10/20/2004 17:15:00.000	TT3	U133Plus-P1271	70	female	white	FLC	8.3	4.4	1.8	231	0.3	10.1		50	2	0	0	0	43.5	0	43.5	Validation	0	0	0	1934-06-08	2004-09-27	2004-10-08		2008-05-05		0	0	2008-05-05	2008-05-05	43	44
446	17387	P1282-01-D962-U133Plus-2.CEL	11/18/2004 12:59:00.000	TT3	U133Plus-P1282-01	54	male	white	IgG	2.3	0.99	0.9	135	4.5	12.5	34	40	4	1	1	0	43.9	0	43.9	Validation	0	0	0	1951-04-19	2004-10-07	2004-10-27		2008-06-05		0	0	2008-06-05	2008-06-05	44	44
447	17378	P1283-01-D918-U133Plus-2.CEL	11/18/2004 12:21:00.000	TT3	U133Plus-P1283-01	70	female	white	IgA	5.3	20.2	0.8	264	3.3	9.5		81	57	0	1	1	4.66667	1	5.4	Validation	1	1	1	1934-06-13	2004-10-05	2004-10-22	2005-03-11	2005-04-02	2005-04-02	1	1	2005-03-11	2005-04-02	5	6
448	17324	P1291-02-E002-U133Plus-2.CEL	11/18/2004 12:34:00.000	TT3	U133Plus-P1291-02	74	male	other	IgG	3.5	2.4	1.2	220	2.8	12.5	17	20	12	1	1	1	4.16667	1	4.5	Validation	1	1	1	1931-05-02	2004-09-22	2004-10-29	2005-03-03	2005-03-13	2005-03-13	1	1	2005-03-03	2005-03-13	5	6
449	17439	P1295-01-E043-U133Plus-2.CEL	02/16/2005 12:46:00.000	TT3	U133Plus-P1295-01	71	male	white	IgG	2.5	0.99		179	4.6	12	30	70	15	1	1	0	43.2667	0	43.2667	Validation	0	0	0	1934-06-17	2004-10-21	2004-12-03		2008-06-23		0	0	2008-06-23	2008-06-23	42	44
450	17399	P1296-00-D980-U133Plus-2.CEL	12/03/2004 19:36:00.000	TT3	U133Plus-P1296-00	38	male	white	FLC	3.2	0.99	2.4	119	4.8	13	26	30	12	1	1	0	44.1333	0	44.1333	Validation	0	0	0	1966-06-07	2004-10-13	2004-11-03		2008-06-19		0	0	2008-06-19	2008-06-19	43	44
451	17482	P1305-01-E053-U133Plus-2.CEL	12/03/2004 13:00:00.000	TT3	U133Plus-P1305-01	54	male	other	IgG	3.2	2.4	1	180	3.8	9.5	97	60	18	1	1	1	36.7333	1	36.7333	Validation	0	0	0	1951-05-02	2004-11-04	2004-12-03		2007-12-10	2007-12-10	0	1	2007-12-10	2007-12-10	36	37
452	17473	P1307-01-E064-U133Plus-2.CEL	12/03/2004 12:23:00.000	TT3	U133Plus-P1307-01	49	female	other	IgG	3.6	3	0.7	229	3.7	9	45	81	0	0	1	1	28.7	0	38.8	Validation	0	0	0	1956-01-16	2004-11-02	2004-11-22	2007-04-02	2008-01-30		1	0	2007-04-02	2008-01-30	29	38
453	17475	P1308-01-E066-U133Plus-2.CEL	12/03/2004 13:13:00.000	TT3	U133Plus-P1308-01	66	male	white	FLC	3.7	22.7	1.4	235	4.6	9.2	50	40	52	1	0	0	43.1667	0	43.1667	Validation	1	0	0	1938-07-27	2004-11-02	2004-11-17		2008-06-04		0	0	2008-06-04	2008-06-04	43	43
454	17480	P1309-01-E068-U133Plus-2.CEL	12/03/2004 11:25:00.000	TT3	U133Plus-P1309-01	64	female	white	FLC	25.4	13.4	9.9	196	4.1	9.5	21	30	29	0	1	1	8.2	1	8.2	Validation	1	1	1	1941-04-16	2004-11-04	2004-11-18		2005-07-22	2005-07-22	0	1	2005-07-22	2005-07-22	8	8
455	17426	P1312-02-D995-U133Plus-2.CEL	12/22/2004 12:57:00.000	TT3	U133Plus-P1312-02	62	female	white	FLC	4.2	4.7	0.9	152	4.4	12.3	17	70	14	0	1	1	34.4	1	34.4	Validation	0	0	0	1943-03-19	2004-10-19	2004-11-02		2007-08-31	2007-08-31	0	1	2007-08-31	2007-08-31	33	34
456	17403	P1313-02-D975-U133Plus-2.CEL	02/16/2005 12:09:00.000	TT3	U133Plus-P1313-02	58	male	white	IgA	2.1	14.7	0.8	149	4.5	13.1		7.5		1	0	0	41.7	0	41.7	Validation	0	0	0	1946-09-05	2004-10-13	2004-11-19		2008-04-23		0	0	2008-04-23	2008-04-23	41	42
457	17353	P1314-00-D963-U133Plus-2.CEL	02/16/2005 15:10:00.000	TT3	U133Plus-P1314-00	70	male	white	FLC	4.9	2.3	1.5	207	4.5	11	21	81		1	1	0	43.5667	0	43.5667	Validation	0	0	0	1934-01-09	2004-09-30	2004-11-17		2008-06-16		0	0	2008-06-16	2008-06-16	43	45
458	17331	P1316-00-D934-U133Plus-2.CEL	02/16/2005 14:44:00.000	TT3	U133Plus-P1316-00	67	male	white	FLC	2.4	3.2	1.2	204	4.4	13.2	22	20	15	1	1	0	43.8	0	43.8	Validation	0	0	0	1937-09-05	2004-09-27	2004-11-17		2008-06-23		0	0	2008-06-23	2008-06-23	43	45
459	17477	P1320-01-E088-U133Plus-2.CEL	12/14/2004 12:37:00.000	TT3	U133Plus-P1320-01	68	female	white	IgG	2.3	2.5	0.8	156	3.9	12.4	25	20	2	0	0	0	42.7	0	42.7	Validation	0	0	0	1936-10-08	2004-11-02	2004-12-01		2008-06-04		0	0	2008-06-04	2008-06-04	42	43
460	17449	P1321-00-E004-U133Plus-2.CEL	01/21/2005 14:00:00.000	TT3	U133Plus-P1321-00	42	male	other	FLC	2.5	19.4	1.1	219	3.8	9.5	7.5	20	39	1	0	0	43.7667	0	43.7667	Validation	1	0	0	1962-07-06	2004-10-25	2004-11-04		2008-06-09		0	0	2008-06-09	2008-06-09	43	44
461	17492	P1323-01-E099-U133Plus-2.CEL	12/14/2004 14:01:00.000	TT3	U133Plus-P1323-01	45	male	other	IgG	3.5	0.99	0.9	140	3.5	10	77	40	0	1	1	0	37.8	0	37.8	Validation	0	0	0	1959-09-18	2004-11-08	2004-12-06		2008-01-14		0	0	2008-01-14	2008-01-14	37	38
462	17565	P1331-02-E169-U133Plus-2.CEL	01/11/2005 13:51:00.000	TT3	U133Plus-P1331-02	59	male	white	IgA	2.1	2.3	1.1	129	3.8	10.8	70	80		1	1	0	42.7	0	42.7	Validation	1	0	0	1946-04-04	2004-11-30	2004-12-21		2008-06-24		0	0	2008-06-24	2008-06-24	42	43
463	17546	P1336-02-E158-U133Plus-2.CEL	01/21/2005 15:07:00.000	TT3	U133Plus-P1336-02	64	male	white	IgG	4	3.6	1.1	150	4.1	9.8	50	50	11	1	1	0	41.6	0	41.6	Validation	0	0	0	1940-10-26	2004-11-22	2005-01-05		2008-06-06		0	0	2008-06-06	2008-06-06	41	43
464	17578	P1337-01-E200-U133Plus-2.CEL	01/21/2005 13:35:00.000	TT3	U133Plus-P1337-01	67	male	white	IgG	3	0.99	0.8	120	4.2	13.4	25	25	7	1	0	0	41.5333	0	41.5333	Validation	0	0	0	1937-09-14	2004-12-03	2005-01-10		2008-06-09		0	0	2008-06-09	2008-06-09	41	42
465	17540	P1338-01-E237-U133Plus-2.CEL	01/21/2005 13:23:00.000	TT3	U133Plus-P1338-01	46	male	other	IgG	2.3	1.5	1.2	111	4	10.5	25	30	3	1	1	0	42	0	42	Validation	1	0	0	1959-01-13	2004-11-22	2004-12-29		2008-06-11		0	0	2008-06-11	2008-06-11	42	43
466	17576	P1339-01-E247-U133Plus-2.CEL	01/21/2005 13:11:00.000	TT3	U133Plus-P1339-01	39	female	white	IgG	1.4	0.99	0.7	161	4.3	12.2		4.9	0	0	1	0	40.7	0	40.7	Validation	0	0	0	1966-06-24	2004-12-03	2005-01-31		2008-06-05		0	0	2008-06-05	2008-06-05	41	42
467	17548	P1341-01-E149-U133Plus-2.CEL	01/21/2005 14:25:00.000	TT3	U133Plus-P1341-01	66	male	white	IgG	4	0.99	1	134	4.1	13.1		81	6	1	1	0	42.9	0	42.9	Validation	0	0	0	1939-06-02	2004-11-22	2004-12-07		2008-06-16		0	0	2008-06-16	2008-06-16	42	43
468	17651	P1350-01-E288-U133Plus-2.CEL	02/04/2005 12:30:00.000	TT3	U133Plus-P1350-01	72	male	white	IgG	3.2	8.6	0.9	136	3.7	12.5	25	30	0	1	0	0	35.6667	0	35.6667	Validation	0	0	0	1932-10-14	2005-01-05	2005-02-18		2008-01-24		0	0	2008-01-24	2008-01-24	35	36
469	17684	P1354-01-E286-U133Plus-2.CEL	02/04/2005 13:31:00.000	TT3	U133Plus-P1354-01	61	male	white	FLC	2.7	3.5	1.2	121	4.4	12.2	33	30	18	1	1	0	40.8333	0	40.8333	Validation	0	0	0	1943-11-01	2005-01-13	2005-01-26		2008-06-04		0	0	2008-06-04	2008-06-04	41	41
470	17636	P1359-01-E293-U133Plus-2.CEL	02/16/2005 12:34:00.000	TT3	U133Plus-P1359-01	47	female	other	IgG	7.9	164.9	1.3	314	3.5	9.6		81	0	0	1	0	37.8	0	37.8	Validation	0	0	0	1958-03-04	2004-12-30	2005-01-21		2008-02-29		0	0	2008-02-29	2008-02-29	37	38
471	17414	P1361-01-D981-U133Plus-2.CEL	02/16/2005 13:27:00.000	TT3	U133Plus-P1361-01	57	male	white	IgG	3.8	2.6	1.3	172	3.3	10.2	17	40	9	1	1	0	43.2333	0	43.2333	Validation	0	0	0	1948-04-17	2004-10-14	2004-11-22		2008-06-11		0	0	2008-06-11	2008-06-11	43	44
472	17600	P1362-01-E229-U133Plus-2.CEL	02/16/2005 13:15:00.000	TT3	U133Plus-P1362-01	61	male	white	IgA	1.5	4.5	0.7	144	4.9	15.1	14	30	1	1	1	0	42.5667	0	42.5667	Validation	0	0	0	1944-07-04	2004-12-14	2004-12-24		2008-06-23		0	0	2008-06-23	2008-06-23	42	42
473	17631	P1363-01-E262-U133Plus-2.CEL	02/16/2005 14:07:00.000	TT3	U133Plus-P1363-01	53	male	white	IgG	1.9	1.4	0.7	160	3.8	11.6	30	30	6	1	1	0	41.9	0	41.9	Validation	0	0	0	1951-08-13	2004-12-29	2005-01-14		2008-06-24		0	0	2008-06-24	2008-06-24	41	42
474	17653	P1364-01-E278-U133Plus-2.CEL	02/16/2005 15:23:00.000	TT3	U133Plus-P1364-01	42	male	white	FLC	4.8	0.99	1.5	239	4.7	10.8	46	60	0	1	1	0	40.5	0	40.5	Validation	0	0	0	1962-12-01	2005-01-05	2005-01-21		2008-05-20		0	0	2008-05-20	2008-05-20	40	40
475	17542	P1365-01-E165-U133Plus-2.CEL	02/16/2005 14:56:00.000	TT3	U133Plus-P1365-01	75	male	white		47.2	15.8	2.7	232	4	9.4	30		42	1	1	1	13.4333	1	13.4333	Validation	1	1	1	1930-03-20	2004-11-22	2004-12-14		2006-01-21	2006-01-21	0	1	2006-01-21	2006-01-21	13	14
476	17604	P1366-01-E227-U133Plus-2.CEL	03/01/2005 14:11:00.000	TT3	U133Plus-P1366-01	69	male	white	IgA	3.3	1.5	1	183	4.5	9.5	60	60	27	1	0	1	5.5	1	5.5	Validation	1	1	1	1936-01-09	2004-12-15	2004-12-30		2005-06-13	2005-06-13	0	1	2005-06-13	2005-06-13	6	6
477	17625	P1367-01-E264-U133Plus-2.CEL	02/16/2005 14:32:00.000	TT3	U133Plus-P1367-01	52	female	white	IgG	5.5	3.2	1.2	113	3.5	9.4	42	60	1	0	0	0	41.7333	0	41.7333	Validation	0	0	0	1952-09-08	2004-12-28	2005-01-12		2008-06-17		0	0	2008-06-17	2008-06-17	41	42
478	17652	P1368-01-E276-U133Plus-2.CEL	02/16/2005 13:54:00.000	TT3	U133Plus-P1368-01	68	male	white	FLC	1.8	0.99		161	4.6	12.6	4.9	20	5	1	0	1	5.2	1	5.2	Validation	0	1	1	1937-03-29	2005-01-05	2005-01-21		2005-06-26	2005-06-26	0	1	2005-06-26	2005-06-26	5	5
479	17663	P1371-01-E336-U133Plus-2.CEL	03/01/2005 14:23:00.000	TT3	U133Plus-P1371-01	59	female	white	IgG	3	0.99	0.8	137	4.4	9.4		10	0	0	1	0	39.8667	0	39.8667	Validation	1	0	0	1946-04-29	2005-01-06	2005-02-18		2008-05-29		0	0	2008-05-29	2008-05-29	39	40
480	17660	P1372-01-E294+299-U133Plus-2.CEL	03/01/2005 15:00:00.000	TT3	U133Plus-P1372-01	47	male	white	IgA	<0.5	0.99	1	110	4.6	9.5	81	81	11	1	1	0	38.2667	0	38.2667	Validation	0	0	0	1957-10-05	2005-01-06	2005-02-04		2008-03-28		0	0	2008-03-28	2008-03-28	37	38
481	17764	P1374-01-E347-U133Plus-2.CEL	03/08/2005 14:13:00.000	TT3	U133Plus-P1374-01	55	male	white	IgG	3.3	0.99	0.8	86	3.1	10.9	27	60	0	1	0	0	39.5667	0	39.5667	Validation	0	0	0	1950-03-28	2005-02-04	2005-03-04		2008-06-03		0	0	2008-06-03	2008-06-03	39	40
482	17528	P1375-01-E113-U133Plus-2.CEL	03/08/2005 14:37:00.000	TT3	U133Plus-P1375-01	56	male	white	IgA	4	1.9	1	85	3.8	11.8	30	60	8	1	0	0	42.9	0	42.9	Validation	0	0	0	1948-10-29	2004-11-17	2004-12-03		2008-06-12		0	0	2008-06-12	2008-06-12	42	43
483	17703	P1383-01-E337-U133Plus-2.CEL	03/29/2005 12:35:00.000	TT3	U133Plus-P1383-01	59	female	white	IgG	2.2	0.99	0.7	149	4.3	9.3		50	1	0	1	0	40.3333	0	40.3333	Validation	1	0	0	1945-10-25	2005-01-17	2005-02-23		2008-06-17		0	0	2008-06-17	2008-06-17	40	41
484	17774	P1384-01-E385-U133Plus-2.CEL	03/29/2005 13:00:00.000	TT3	U133Plus-P1384-01	58	male	white	IgG	5	0.99	1.5	175	4.1	8.8	81	50	29	1	1	0	39.6333	0	39.6333	Validation	1	0	0	1947-02-18	2005-02-07	2005-03-02		2008-06-03		0	0	2008-06-03	2008-06-03	39	40
485	17421	P1389-00-E033-U133Plus-2.CEL	03/29/2005 13:37:00.000	TT3	U133Plus-P1389-00	68	male	white	IgG	4.3	0.99	1.3	118	4.1	13.4	8	7.5	17	1	1	0	40.3667	0	40.3667	Validation	1	0	0	1937-08-21	2004-10-18	2005-02-25		2008-06-20		0	0	2008-06-20	2008-06-20	40	44
486	17654	P1390-00-E300-U133Plus-2.CEL	03/29/2005 12:22:00.000	TT3	U133Plus-P1390-00	57	male	white	IgG	3.8	5.6	0.9	120	3.3	7.8		91	5	1	1	0	39.9333	0	39.9333	Validation	0	0	0	1948-05-08	2005-01-05	2005-02-09		2008-05-22		0	0	2008-05-22	2008-05-22	39	40
487	17740	P1391-00-E358-U133Plus-2.CEL	03/29/2005 13:12:00.000	TT3	U133Plus-P1391-00	57	male	white	FLC	8.6	0.99	4.3	159	4	9.7	45	60	11	1	0	0	40.6667	0	40.6667	Validation	0	0	0	1947-12-02	2005-01-28	2005-02-17		2008-06-21		0	0	2008-06-21	2008-06-21	40	41
488	17866	P1400-01-E435-U133Plus-2.CEL	04/22/2005 14:54:00.000	TT3	U133Plus-P1400-01	61	female	white	IgA	5.3	6.3	0.7	141	3.2	8.4	61	81	10	0	1	0	39.1667	0	39.1667	Validation	1	0	0	1943-12-31	2005-03-11	2005-03-18		2008-06-05		0	0	2008-06-05	2008-06-05	39	39
489	17853	P1401-01-E437-U133Plus-2.CEL	04/27/2005 12:27:00.000	TT3	U133Plus-P1401-01	64	female	white	IgA	4.5	7.5	0.9	89	3.7	6.9	48		33	0	1	0	39.3	0	39.3	Validation	1	0	0	1940-12-21	2005-03-04	2005-03-18		2008-06-09		0	0	2008-06-09	2008-06-09	39	39
490	17840	P1402-01-E441-U133Plus-2.CEL	04/22/2005 11:42:00.000	TT3	U133Plus-P1402-01	45	female	other	IgG	1.8	3.3	1.1	128	4.4	9.6	24	20	0	0	1	0	39.1333	0	39.1333	Validation	0	0	0	1960-01-22	2005-02-25	2005-03-16		2008-06-02		0	0	2008-06-02	2008-06-02	39	40
491	17897	P1403-01-E454-U133Plus-2.CEL	04/22/2005 11:54:00.000	TT3	U133Plus-P1403-01	55	male	white	IgG	3.2	0.99	1	137	2.6	9.5	48	60	0	1	1	0	39.2333	0	39.2333	Validation	1	0	0	1950-01-05	2005-03-23	2005-03-30		2008-06-19		0	0	2008-06-19	2008-06-19	39	39
492	17801	P1405-01-E440-U133Plus-2.CEL	04/22/2005 14:04:00.000	TT3	U133Plus-P1405-01	53	male	white	IgG	5.3	0.99	1.1	127	3.4	10.7	30	7.5	10	1	0	0	39.6667	0	39.6667	Validation	1	0	0	1952-08-24	2005-02-14	2005-03-17		2008-06-19		0	0	2008-06-19	2008-06-19	39	40
493	17923	P1407-01-E466-U133Plus-2.CEL	04/22/2005 12:19:00.000	TT3	U133Plus-P1407-01	64	female	white	IgA	49.1	0.99	7.9	193	4	8.7	26	60	7	0	1	1	5.1	1	5.1	Validation	0	1	1	1941-09-10	2005-03-30	2005-04-05		2005-09-05	2005-09-05	0	1	2005-09-05	2005-09-05	5	6
494	17890	P1408-01-E461-U133Plus-2.CEL	04/22/2005 15:06:00.000	TT3	U133Plus-P1408-01	54	female	white	IgG	3.8	0.99	0.7	111	3.8	11.2	48	70	15	0	1	1	20.3333	1	24.1333	Validation	1	1	0	1950-12-01	2005-03-22	2005-04-06	2006-12-07	2007-03-31	2007-03-31	1	1	2006-12-07	2007-03-31	20	24
495	17847	P1409-01-E433-U133Plus-2.CEL	04/22/2005 12:48:00.000	TT3	U133Plus-P1409-01	43	male	white	IgA	4	0.99	1.5	68	4	9	47	60	2	1	1	0	39.8333	0	39.8333	Validation	0	0	0	1962-02-25	2005-03-02	2005-03-16		2008-06-23		0	0	2008-06-23	2008-06-23	39	39
496	17934	P1412-01-E507-U133Plus-2.CEL	04/27/2005 11:50:00.000	TT3	U133Plus-P1412-01	51	female	white	NSE	1.8	4.4	0.6	191	4	13	30	15	39	0	0	0	38.7	0	38.7	Validation	1	0	0	1954-08-26	2005-04-06	2005-04-20		2008-06-24		0	0	2008-06-24	2008-06-24	38	38
497	17878	P1424-02-E484-U133Plus-2.CEL	07/08/2005 12:03:00.000	TT3	U133Plus-P1424-02	70	female	white	IgG	2.6	3.4	0.8	149	3.8	9.5	34.9	81	13	0	1	0	38.6333	0	38.6333	Validation	0	0	0	1935-05-14	2005-03-16	2005-04-08		2008-06-10		0	0	2008-06-10	2008-06-10	38	39
498	20514	P1432-01-E634-U133Plus-2.CEL	06/23/2005 13:10:00.000	TT3	U133Plus-P1432-01	49	male	white		2.2	4.95	0.9	134	4.2	12.8	58	50	16	1	1	0	34	0	34	Validation	0	0	0	1956-11-29	2005-05-25	2005-08-25		2008-06-10		0	0	2008-06-10	2008-06-10	34	37
499	18002	P1434-01-E537-U133Plus-2.CEL	06/23/2005 14:54:00.000	TT3	U133Plus-P1434-01	63	female	white	IgG	1.9	3.7	0.6	124	4.1	11.5	25	60	2	0	0	0	34.4667	0	34.4667	Validation	1	0	0	1942-10-14	2005-04-25	2005-05-19		2008-03-18		0	0	2008-03-18	2008-03-18	34	35
500	17940	P1437-01-E510-U133Plus-2.CEL	06/30/2005 13:09:00.000	TT3	U133Plus-P1437-01	70	male	white	IgG	3.5	0.99	0.8	160	4.4	10.8	40	40	0	1	0	0	38.2	0	38.2	Validation	0	0	0	1935-01-18	2005-04-07	2005-05-04		2008-06-23		0	0	2008-06-23	2008-06-23	37	38
501	17949	P1438-01-E539-U133Plus-2.CEL	06/30/2005 12:44:00.000	TT3	U133Plus-P1438-01	60	female	white	IgG	4.1	12.5	1.3	154	4.4	11.6	30	7.5	33	0	1	0	37.0667	0	37.0667	Validation	0	0	0	1945-01-08	2005-04-08	2005-05-20		2008-06-05		0	0	2008-06-05	2008-06-05	37	38
502	20226	P1439-01-E614-U133Plus-2.CEL	06/30/2005 12:32:00.000	TT3	U133Plus-P1439-01	54	male	white	NSE	1.4	0.99	1.1	295	4.6	13.7	45	60	7	1	1	0	36.4	0	36.4	Validation	1	0	0	1951-10-07	2005-05-20	2005-06-01		2008-05-28		0	0	2008-05-28	2008-05-28	35	36
503	17944	P1441-01-E567-U133Plus-2.CEL	07/01/2005 13:17:00.000	TT3	U133Plus-P1441-01	61	male	white	IgG	4.9	0.99	1.1	97	4	9.6	20	60	9	1	0	0	36.8667	0	36.8667	Validation	0	0	0	1944-03-27	2005-04-07	2005-05-27		2008-06-06		0	0	2008-06-06	2008-06-06	37	38
504	18006	P1442-01-E575-U133Plus-2.CEL	07/01/2005 13:42:00.000	TT3	U133Plus-P1442-01	66	male	white	IgG	15.9	10.1	8.3	192	4	9	15	20	0	1	1	1	30.5	0	37.7333	Validation	1	0	0	1939-06-09	2005-04-26	2005-05-19	2007-11-20	2008-06-24		1	0	2007-11-20	2008-06-24	30	38
505	17987	P1443-01-E544-U133Plus-2.CEL	07/01/2005 14:20:00.000	TT3	U133Plus-P1443-01	64	male	white	IgG	6.7	26.9	1.2	258	3.8	12	50	65		1	0	1	6.66667	1	6.66667	Validation	1	1	1	1941-06-01	2005-04-19	2005-05-18		2005-12-04	2005-12-04	0	1	2005-12-04	2005-12-04	7	8
506	18013	P1444-01-E568-U133Plus-2.CEL	07/01/2005 15:59:00.000	TT3	U133Plus-P1444-01	71	male	other	IgG	1.8	0.99	1	138	4.4	14.2	51	40	7	1	1	0	37.1	0	37.1	Validation	0	0	0	1934-03-19	2005-04-29	2005-05-25		2008-06-11		0	0	2008-06-11	2008-06-11	37	38
507	18945	P1445-01-E571-U133Plus-2.CEL	07/01/2005 15:22:00.000	TT3	U133Plus-P1445-01	57	female	white	IgG	5.2	1.8	0.9	202	4.2	9.3	40		22	0	1	0	37.3333	0	37.3333	Validation	0	0	0	1948-06-03	2005-05-05	2005-05-18		2008-06-11		0	0	2008-06-11	2008-06-11	37	37
508	17929	P1446-01-E504-U133Plus-2.CEL	07/01/2005 14:07:00.000	TT3	U133Plus-P1446-01	43	male	white	IgA	1.5	0.99	0.7	118	4.5	13.8	15	30	2	1	1	0	33.0667	0	33.0667	Validation	0	0	0	1962-05-14	2005-04-04	2005-05-11		2008-01-28		0	0	2008-01-28	2008-01-28	32	33
509	18009	P1447-01-E553-U133Plus-2.CEL	07/01/2005 13:54:00.000	TT3	U133Plus-P1447-01	47	male	white	IgG	2	0.99	0.9	110	4.2	12.4	20	30	33	1	0	0	37.3333	0	37.3333	Validation	0	0	0	1958-10-08	2005-04-27	2005-05-19		2008-06-12		0	0	2008-06-12	2008-06-12	37	38
510	18012	P1448-01-E561-U133Plus-2.CEL	07/06/2005 12:09:00.000	TT3	U133Plus-P1448-01	59	male	white	IgA	6.4	0.99	1.8	119	4.1	9.5	64	30	5	1	1	0	37.6333	0	37.6333	Validation	1	0	0	1945-12-17	2005-04-29	2005-05-18		2008-06-20		0	0	2008-06-20	2008-06-20	37	38
511	17904	P1450-01-E503-U133Plus-2.CEL	07/06/2005 11:56:00.000	TT3	U133Plus-P1450-01	65	male	white	IgG	3.3	0.99	1.1	147	4.6	11.7	24	10	4	1	1	0	38.0333	0	38.0333	Validation	0	0	0	1940-04-19	2005-03-25	2005-04-29		2008-06-13		0	0	2008-06-13	2008-06-13	38	39
512	17984	P1451-01-E558-U133Plus-2.CEL	07/07/2005 13:32:00.000	TT3	U133Plus-P1451-01	65	female	white	IgG	8.5	9	1	125	3.5	8.3	42	50	0	0	1	1	18.3333	1	19.3667	Validation	1	1	1	1940-09-23	2005-04-19	2005-05-06	2006-11-07	2006-12-08	2006-12-08	1	1	2006-11-07	2006-12-08	18	20
513	17933	P1453-01-E515-U133Plus-2.CEL	07/07/2005 13:20:00.000	TT3	U133Plus-P1453-01	42	female	white	FLC	4.5	0.99	0.7	209	3.8	9	7.5	45	10	0	1	1	25.8667	1	29.3	Validation	1	0	0	1962-12-31	2005-04-06	2005-06-02	2007-07-18	2007-10-29	2007-10-29	1	1	2007-07-18	2007-10-29	25	30
514	17926	P1454-01-E513-U133Plus-2.CEL	07/07/2005 13:58:00.000	TT3	U133Plus-P1454-01	55	female	other	IgG	2.8	0.99	0.8	187	4.8	8.8	50	40	0	0	1	0	34.5333	0	34.5333	Validation	0	0	0	1950-08-09	2005-03-30	2005-05-04		2008-03-05		0	0	2008-03-05	2008-03-05	34	36
515	18650	P1455-01-E588-U133Plus-2.CEL	07/07/2005 16:06:00.000	TT3	U133Plus-P1455-01	63	female	white	IgG	2.1	0.99	0.8	165	3.9	11.1	20	20	0	0	1	0	37.1333	0	37.1333	Validation	0	0	0	1942-05-09	2005-05-03	2005-06-01		2008-06-19		0	0	2008-06-19	2008-06-19	36	37
516	17794	P1456-01-E388-U133Plus-2.CEL	07/14/2005 14:52:00.000	TT3	U133Plus-P1456-01	54	female	white	IgG	2.7	0.99	0.9	106	4.1	11.1	7	20	0	0	0	0	36.7	0	36.7	Validation	0	0	0	1951-10-28	2005-02-10	2005-06-08		2008-06-13		0	0	2008-06-13	2008-06-13	36	40
517	17864	P1458-01-E488-U133Plus-2.CEL	07/14/2005 15:05:00.000	TT3	U133Plus-P1458-01	67	male	other	IgG	3.9	8.6	1.2	244	4.6	11.9	30	20	37	1	0	0	38.3667	0	38.3667	Validation	1	0	0	1938-07-20	2005-03-10	2005-04-15		2008-06-09		0	0	2008-06-09	2008-06-09	38	39
518	19434	P1463-01-E600-U133Plus-2.CEL	07/15/2005 14:25:00.000	TT3	U133Plus-P1463-01	61	female	white	IgG	5.2	0.99	0.8	192	3.6	12.3	44	60	5	0	1	1	25.6667	1	25.6667	Validation	0	0	0	1944-08-20	2005-05-11	2005-06-06		2007-07-16	2007-07-16	0	1	2007-07-16	2007-07-16	25	26
519	21058	P1465-01-E735-U133Plus-2.CEL	11/15/2006 11:41:00.000	TT3	U133Plus-P1465-01	67	female	white	FLC	6	14	1.1	182	4.1	8.6	23	55		0	0	0	33.8667	0	33.8667	Validation	0	0	0	1938-04-05	2005-06-21	2005-07-13		2008-04-24		0	0	2008-04-24	2008-04-24	33	34
520	21018	P1477-01-E681-U133Plus-2.CEL	08/04/2005 14:07:00.000	TT3	U133Plus-P1477-01	49	male	white	IgG	2.4	0.99	1.1	122	4.2	9.8	91	70	2	1	0	0	36	0	36	Validation	1	0	0	1956-03-14	2005-06-10	2005-06-28		2008-06-12		0	0	2008-06-12	2008-06-12	36	36
521	21052	P1480-01-E701-U133Plus-2.CEL	08/04/2005 12:10:00.000	TT3	U133Plus-P1480-01	70	female	white	IgG	4.9	6	1	194	4.3	10	12.5	60	17	0	1	0	35.9333	0	35.9333	Validation	1	0	0	1935-12-22	2005-06-21	2005-07-08		2008-06-20		0	0	2008-06-20	2008-06-20	35	36
522	21016	P1492-01-E680-U133Plus-2.CEL	08/04/2005 14:19:00.000	TT3	U133Plus-P1492-01	66	female	white	FLC	1.6	4.95	0.7	146	4	13.5	27.5	70	7	0	1	0	34.9333	0	34.9333	Validation	0	0	0	1939-03-24	2005-06-07	2005-07-20		2008-06-02		0	0	2008-06-02	2008-06-02	35	36
523	21129	P1502-01-E768-U133Plus-2.CEL	08/17/2005 11:58:00.000	TT3	U133Plus-P1502-01	52	male	white	IgA	4.2	7	1.6	130	3.8	12.6	66	81	1	1	0	0	35	0	35	Validation	1	0	0	1953-06-24	2005-07-13	2005-08-05		2008-06-20		0	0	2008-06-20	2008-06-20	34	35
524	17748	P1503-01-E387-U133Plus-2.CEL	08/17/2005 12:21:00.000	TT3	U133Plus-P1503-01	65	male	white	IgG	2.1	4.95	0.9	199	4.2	10.6	15	70		1	1	0	29.3333	0	29.3333	Validation	0	0	0	1940-09-11	2005-02-01	2006-01-12		2008-06-10		0	0	2008-06-10	2008-06-10	29	40
525	21176	P1507-01-E797-U133Plus-2.CEL	08/24/2005 12:42:00.000	TT3	U133Plus-P1507-01	62	female	white	IgG	2.1	9	0.7	117	3.7	11.5	4.9	4.9	6	0	1	0	33.6333	0	33.6333	Validation	1	0	0	1943-06-03	2005-07-27	2005-09-14		2008-06-19		0	0	2008-06-19	2008-06-19	33	35
526	21194	P1509-01-E814-U133Plus-2.CEL	08/24/2005 13:25:00.000	TT3	U133Plus-P1509-01	48	male	white	IgG	2	17	1.3	101	4	12.7	22	30	0	1	0	0	31.9333	0	31.9333	Validation	0	0	0	1957-09-09	2005-08-01	2005-10-28		2008-06-12		0	0	2008-06-12	2008-06-12	32	34
527	21206	P1529-01-E818-U133Plus-2.CEL	08/26/2005 11:18:00.000	TT3	U133Plus-P1529-01	64	male	white		1.7	4.95	0.7	124	4.2	12.8	20	7.5		1	1	0	34.4333	0	34.4333	Validation	0	0	0	1941-07-07	2005-08-03	2005-08-26		2008-06-24		0	0	2008-06-24	2008-06-24	34	34
528	20938	P1550-01-E679-U133Plus-2.CEL	09/21/2005 15:26:00.000	TT3	U133Plus-P1550-01	56	male	white	FLC	8.5	4.95	1.4	239	4.7	9.7		40		1	0	0	35.4	0	35.4	Validation	0	0	0	1949-04-12	2005-06-01	2005-06-30		2008-05-27		0	0	2008-05-27	2008-05-27	35	35
529	21079	P1558-02-E821-U133Plus-2.CEL	10/06/2005 12:49:00.000	TT3	U133Plus-P1558-02	47	female	white	IgG	2.4	6	0.9	151	4	12.1	10	12.5		0	1	0	34.7333	0	34.7333	Validation	0	0	0	1958-03-12	2005-06-28	2005-08-16		2008-06-23		0	0	2008-06-23	2008-06-23	34	36
530	21230	P1562-01-E829-U133Plus-2.CEL	10/06/2005 13:01:00.000	TT3	U133Plus-P1562-01	65	male	white		2.5	27	1.1	121	4.4	13.2	17	10	9	1	1	0	34.0667	0	34.0667	Validation	1	0	0	1940-12-17	2005-08-15	2005-08-31		2008-06-18		0	0	2008-06-18	2008-06-18	34	34
531	21314	P1569-01-E902-U133Plus-2.CEL	10/13/2005 12:05:00.000	TT3	U133Plus-P1569-01	62	female	other	IgA	4.5	8	1	151	3.4	10.7	26	17.5	10	0	0	0	32.2	0	32.2	Validation	0	0	0	1943-09-07	2005-09-13	2005-10-27		2008-06-19		0	0	2008-06-19	2008-06-19	32	33
532	20717	P1571-01-E644-U133Plus-2.CEL	10/13/2005 12:16:00.000	TT3	U133Plus-P1571-01	62	female	white	IgG	1.9	0.99	0.8	137	3.4	12.1	15	15	1	0	1	0	31.2667	0	31.2667	Validation	1	0	0	1943-12-06	2005-05-27	2005-06-29		2008-01-23		0	0	2008-01-23	2008-01-23	31	32
533	21297	P1579-01-E903-U133Plus-2.CEL	10/27/2005 12:21:00.000	TT3	U133Plus-P1579-01	56	male	white	IgA	10.4	4.95	0.9	90	3.7	10	20	70	0	1	1	0	30.4	0	30.4	Validation	0	0	0	1950-02-13	2005-09-10	2005-10-05		2008-04-04		0	0	2008-04-04	2008-04-04	30	31
534	21083	P1580-01-E714-U133Plus-2.CEL	11/09/2005 12:51:00.000	TT3	U133Plus-P1580-01	66	male	white	IgG	3.2	6	1.3	238	2.8	8.5	25	25	0	1	0	0	34.8667	0	34.8667	Validation	0	0	0	1939-08-22	2005-06-28	2005-07-29		2008-06-09		0	0	2008-06-09	2008-06-09	35	36
535	21184	P1581-01-E800-U133Plus-2.CEL	11/09/2005 11:22:00.000	TT3	U133Plus-P1581-01	63	male	white		4.5	4.95	1.5	123	3.7	9.9	81	70		1	1	0	34.5667	0	34.5667	Validation	0	0	0	1942-04-05	2005-07-29	2005-08-17		2008-06-19		0	0	2008-06-19	2008-06-19	34	35
536	21234	P1583-01-E853-U133Plus-2.CEL	11/09/2005 12:08:00.000	TT3	U133Plus-P1583-01	60	female	other		6	6	0.8	122	4.1	8.3	50	81	24	0	1	0	34.0333	0	34.0333	Validation	1	0	0	1946-02-10	2005-08-15	2005-09-07		2008-06-24		0	0	2008-06-24	2008-06-24	33	34
537	21097	P1586-01-E742-U133Plus-2.CEL	11/09/2005 14:18:00.000	TT3	U133Plus-P1586-01	48	male	white	IgG	2.6	10	1.3	127	3.1	12.3	43	60	0	1	1	0	35.1333	0	35.1333	Validation	0	0	0	1957-02-25	2005-07-01	2005-07-29		2008-06-17		0	0	2008-06-17	2008-06-17	35	35
538	21309	P1587-01-E921-U133Plus-2.CEL	11/09/2005 14:30:00.000	TT3	U133Plus-P1587-01	56	female	other	IgG	2.5	22	0.6	214	3.5	9.2			5	0	0	1	16.8333	1	20.8667	Validation	0	1	1	1949-08-01	2005-09-12	2005-10-11	2007-02-28	2007-06-29	2007-06-29	1	1	2007-02-28	2007-06-29	16	21
539	19764	P1589-01-E584-U133Plus-2.CEL	11/10/2005 14:15:00.000	TT3	U133Plus-P1589-01	53	female	white	IgA	3	49	0.7	137	3.6	8.7	81	60	52	0	0	1	30	0	37.4667	Validation	1	0	0	1952-09-08	2005-05-13	2005-05-27	2007-11-13	2008-06-24		1	0	2007-11-13	2008-06-24	30	37
540	21075	P1590-01-E719-U133Plus-2.CEL	11/10/2005 12:53:00.000	TT3	U133Plus-P1590-01	54	male	white	IgG	1.9	13	0.9	109	3.8	12.1	10	15	6	1	0	0	34.6	0	34.6	Validation	0	0	0	1951-03-11	2005-06-24	2005-07-26		2008-05-29		0	0	2008-05-29	2008-05-29	34	35
541	21076	P1591-01-E712-U133Plus-2.CEL	11/10/2005 12:41:00.000	TT3	U133Plus-P1591-01	42	female	other	IgG	2.9	52	0.7	237	2.5	6	60	81	6	0	1	1	12.3333	1	33.4	Validation	1	1	0	1963-07-18	2005-06-24	2005-07-20	2006-07-25	2008-04-17	2008-04-17	1	1	2006-07-25	2008-04-17	12	34
542	21088	P1592-01-E710-U133Plus-2.CEL	11/10/2005 12:07:00.000	TT3	U133Plus-P1592-01	59	female	white	FLC	2.1	4.95	0.6	143	4.7	13	8	4.9	26	0	0	0	35.0667	0	35.0667	Validation	0	0	0	1947-01-29	2005-06-29	2005-08-02		2008-06-19		0	0	2008-06-19	2008-06-19	34	36
543	21092	P1593-01-E738-U133Plus-2.CEL	11/10/2005 11:55:00.000	TT3	U133Plus-P1593-01	55	female	white	IgG	2.1	15	0.8	217	4.2	10.5	40	60	38	0	1	0	35.1667	0	35.1667	Validation	1	0	0	1950-08-07	2005-06-30	2005-07-28		2008-06-17		0	0	2008-06-17	2008-06-17	35	36
544	21131	P1594-01-E747-U133Plus-2.CEL	11/10/2005 14:27:00.000	TT3	U133Plus-P1594-01	61	female	white	IgA	3.8	4.95	0.8	182	4.4	9.2	70	70	1	0	0	0	33.2	0	33.2	Validation	0	0	0	1944-07-23	2005-07-14	2005-08-08		2008-04-30		0	0	2008-04-30	2008-04-30	32	33
545	21135	P1595-01-E769-U133Plus-2.CEL	11/10/2005 15:01:00.000	TT3	U133Plus-P1595-01	43	male	white	FLC	1.5	4.95	0.9	172	4.6	15.5	15	30	46	1	0	0	34.3333	0	34.3333	Validation	0	0	0	1962-07-14	2005-07-15	2005-08-03		2008-05-29		0	0	2008-05-29	2008-05-29	33	34
546	21142	P1596-01-E739-U133Plus-2.CEL	11/10/2005 14:50:00.000	TT3	U133Plus-P1596-01	53	male	other	IgG	4.7	8	2.5	147	3.3	10.6	30	45	50	1	0	1	20.3333	1	30.3	Validation	0	1	0	1952-07-10	2005-07-18	2005-08-15	2007-04-17	2008-02-10	2008-02-10	1	1	2007-04-17	2008-02-10	20	31
547	21180	P1597-01-E810-U133Plus-2.CEL	11/10/2005 13:52:00.000	TT3	U133Plus-P1597-01	57	male	white	FLC	3.4	8	1.7	225	4.2	13.9	18	40	63	1	0	1	2.33333	1	10.3	Validation	1	1	1	1948-04-17	2005-07-29	2005-08-17	2005-10-26	2006-06-22	2006-06-22	1	1	2005-10-26	2006-06-22	2	11
548	21196	P1598-01-E812-U133Plus-2.CEL	11/10/2005 13:04:00.000	TT3	U133Plus-P1598-01	73	male	white	IgG	3.9	8		228	4.1	11.4	4.9	4.9	45	1	0	0	32.5	0	32.5	Validation	0	0	0	1933-01-16	2005-08-02	2005-08-30		2008-05-01		0	0	2008-05-01	2008-05-01	33	33
549	21251	P1599-01-E877-U133Plus-2.CEL	11/10/2005 13:41:00.000	TT3	U133Plus-P1599-01	65	male	white	IgA	5	13	1.1	103	4	9.9	64	50	18	1	1	0	33.4	0	33.4	Validation	1	0	0	1940-05-25	2005-08-24	2005-09-13		2008-06-11		0	0	2008-06-11	2008-06-11	33	34
550	21263	P1600-01-E869-U133Plus-2.CEL	11/15/2005 13:01:00.000	TT3	U133Plus-P1600-01	73	male	white		4.4	4.95	0.8	100	4.6	9.5	81	65	0	1	1	0	32.5	0	32.5	Validation	0	0	0	1933-01-17	2005-08-29	2005-09-14		2008-05-16		0	0	2008-05-16	2008-05-16	32	33
551	21273	P1601-01-E893-U133Plus-2.CEL	11/15/2005 12:49:00.000	TT3	U133Plus-P1601-01	65	female	white	IgA	3.4	9	0.6	229	3.6	12	36.5	30	14	0	0	0	32.9667	0	32.9667	Validation	1	0	0	1940-07-06	2005-09-01	2005-10-04		2008-06-19		0	0	2008-06-19	2008-06-19	32	33
552	21319	P1602-01-E914-U133Plus-2.CEL	11/15/2005 12:38:00.000	TT3	U133Plus-P1602-01	65	male	white	IgG	2.3	4.95	0.9	172	3.7	12.4	20	7.5	26	1	0	0	32.5333	0	32.5333	Validation	0	0	0	1941-03-01	2005-09-13	2005-10-18		2008-06-20		0	0	2008-06-20	2008-06-20	32	33
553	21355	P1603-01-E929-U133Plus-2.CEL	11/15/2005 12:26:00.000	TT3	U133Plus-P1603-01	66	female	white		2.4	4.95	1	138	4	10.1		20	1	0	0	0	32.1	0	32.1	Validation	1	0	0	1939-09-01	2005-09-26	2005-10-14		2008-06-03		0	0	2008-06-03	2008-06-03	32	33
554	21366	P1604-01-E912-U133Plus-2.CEL	11/15/2005 12:15:00.000	TT3	U133Plus-P1604-01	50	male	white	IgG	4.5	7	1	110	3.5	9.5	57	70	5	1	0	0	32.2667	0	32.2667	Validation	1	0	0	1955-04-21	2005-09-27	2005-10-05		2008-05-30		0	0	2008-05-30	2008-05-30	31	32
555	21367	P1605-01-E926-U133Plus-2.CEL	11/15/2005 13:12:00.000	TT3	U133Plus-P1605-01	62	female	white	IgA	8.4	12	1.2	258	3.3	10.2	63	70	39	0	0	1	12.4	1	12.4	Validation	1	1	1	1943-09-14	2005-09-27	2005-10-14		2006-10-21	2006-10-21	0	1	2006-10-21	2006-10-21	12	13
556	21408	P1606-01-E950-U133Plus-2.CEL	11/15/2005 13:24:00.000	TT3	U133Plus-P1606-01	45	female	white	IgG	12.6	4.95	1	110	3.6	11.8	56	70	2	0	0	0	31.4	0	31.4	Validation	0	0	0	1960-12-16	2005-10-11	2005-10-24		2008-05-23		0	0	2008-05-23	2008-05-23	31	31
557	21472	P1614-01-E995-U133Plus-2.CEL	12/15/2005 16:23:00.000	TT3	U133Plus-P1614-01	49	male	white		2.1	8	1.1	105	4	11.3	7.5	5	0	1	0	0	30.9667	0	30.9667	Validation	1	0	0	1956-08-31	2005-11-01	2005-12-02		2008-06-18		0	0	2008-06-18	2008-06-18	30	31
558	21504	P1618-01-F008-U133Plus-2.CEL	12/15/2005 13:15:00.000	TT3	U133Plus-P1618-01	37	male	white	FLC	4	34	0.8	266	3.6	11.9	23.5	35	62	1	1	0	31.3667	0	31.3667	Validation	0	0	0	1968-08-01	2005-11-15	2005-11-18		2008-06-16		0	0	2008-06-16	2008-06-16	31	31
559	21478	P1622-01-E994-U133Plus-2.CEL	01/10/2006 13:01:00.000	TT3	U133Plus-P1622-01	44	male	white	IgG	3.9	71	0.8	315	3.3	11.8	70	81		1	1	0	31.5	0	31.5	Validation	0	0	0	1962-04-13	2005-11-02	2005-11-18		2008-06-20		0	0	2008-06-20	2008-06-20	31	31
560	21497	P1628-01-F023-U133Plus-2.CEL	01/24/2006 11:50:00.000	TT3	U133Plus-P1628-01	53	female	white		4.2	6	0.8	179	3.9	9.1	84	90	4	0	1	0	30.3	0	30.3	Validation	1	0	0	1952-06-29	2005-11-10	2005-12-06		2008-06-02		0	0	2008-06-02	2008-06-02	30	31
561	21431	P1635-01-E988-U133Plus-2.CEL	02/09/2006 11:43:00.000	TT3	U133Plus-P1635-01	60	male	white		2.7	4.95	1.2	154	3.6	10.1			0	1	1	0	31.2667	0	31.2667	Validation	1	0	0	1946-05-15	2005-10-19	2005-11-29		2008-06-24		0	0	2008-06-24	2008-06-24	31	32
562	21667	P1639-01-F130-U133Plus-2.CEL	02/22/2006 11:44:00.000	TT3	U133Plus-P1639-01	71	male	white		3.7	6	0.7	97	3.4	10.4	22	30		1	0	1	0.766667	1	0.766667	Validation	0	1	1	1935-06-07	2006-01-13	2006-02-22		2006-03-17	2006-03-17	0	1	2006-03-17	2006-03-17	1	2
563	21482	P1644-01-F006-U133Plus-2.CEL	02/24/2006 11:26:00.000	TT3	U133Plus-P1644-01	41	male	other		1.5	8	1.2	254	4.1	15	12	15	2	1	0	0	30.7	0	30.7	Validation	0	0	0	1965-02-10	2005-11-04	2005-12-08		2008-06-16		0	0	2008-06-16	2008-06-16	30	31
564	21542	P1645-01-F048-U133Plus-2.CEL	02/24/2006 11:39:00.000	TT3	U133Plus-P1645-01	59	male	white		1.8	4.95	0.7	89	4.4	12.6	25	81	5	1	1	0	29.8333	0	29.8333	Validation	0	0	0	1947-02-16	2005-11-29	2005-12-14		2008-05-27		0	0	2008-05-27	2008-05-27	29	30
565	21521	P1646-01-F012-U133Plus-2.CEL	02/24/2006 10:49:00.000	TT3	U133Plus-P1646-01	57	male	white		5.3	8	0.7	224	4.2	10.7	81	81	35	1	0	0	29.1333	0	29.1333	Validation	1	0	0	1948-06-26	2005-11-18	2005-12-01		2008-04-23		0	0	2008-04-23	2008-04-23	28	29
